# Supplementary material for: Synthesis and Characterization of Novel Methyl (3)5-(N-Boc-piperidinyl)-1H-pyrazole-4-carboxylates
Source: MDPI journal article supplement (doi:10.3390/molecules26133808), 2021-06-22
Supplement: s1 [file s1]

## **Synthesis and Characterization of Novel Methyl (3)5-(*N*-Boc-piperidinyl)- 1*H*-pyrazole-4-carboxylates**

Gita Matulevičiūtė <sup>1,2</sup>, Eglė Arbačiauskienė <sup>2,\*</sup>, Neringa Kleizienė <sup>1</sup>, Vilija Kederienė <sup>2</sup>,  
Greta Ragaitė <sup>1</sup>, Miglė Dagilienė <sup>1</sup>, Aurimas Bieliauskas <sup>1</sup>, Vaida Milišiūnaitė <sup>1</sup>, Frank A.  
Sløk <sup>3</sup> and Algirdas Šačkus <sup>1,\*</sup>

<sup>1</sup> Institute of Synthetic Chemistry, Kaunas University of Technology,  
K. Baršausko g. 59, Kaunas LT-51423, Lithuania;

<sup>2</sup> Department of Organic Chemistry, Kaunas University of Technology,  
Radvilenų pl. 19, Kaunas LT-50254, Lithuania;

<sup>3</sup> Vipergen ApS,  
Gammel Kongevej 23A, Copenhagen V DK-1610, Denmark

\* Corresponding authors

E-mail address: algirdas.sackus@ktu.lt (A. Šačkus), egle.arbaciauskiene@ktu.lt (E. Arbačiauskienė)

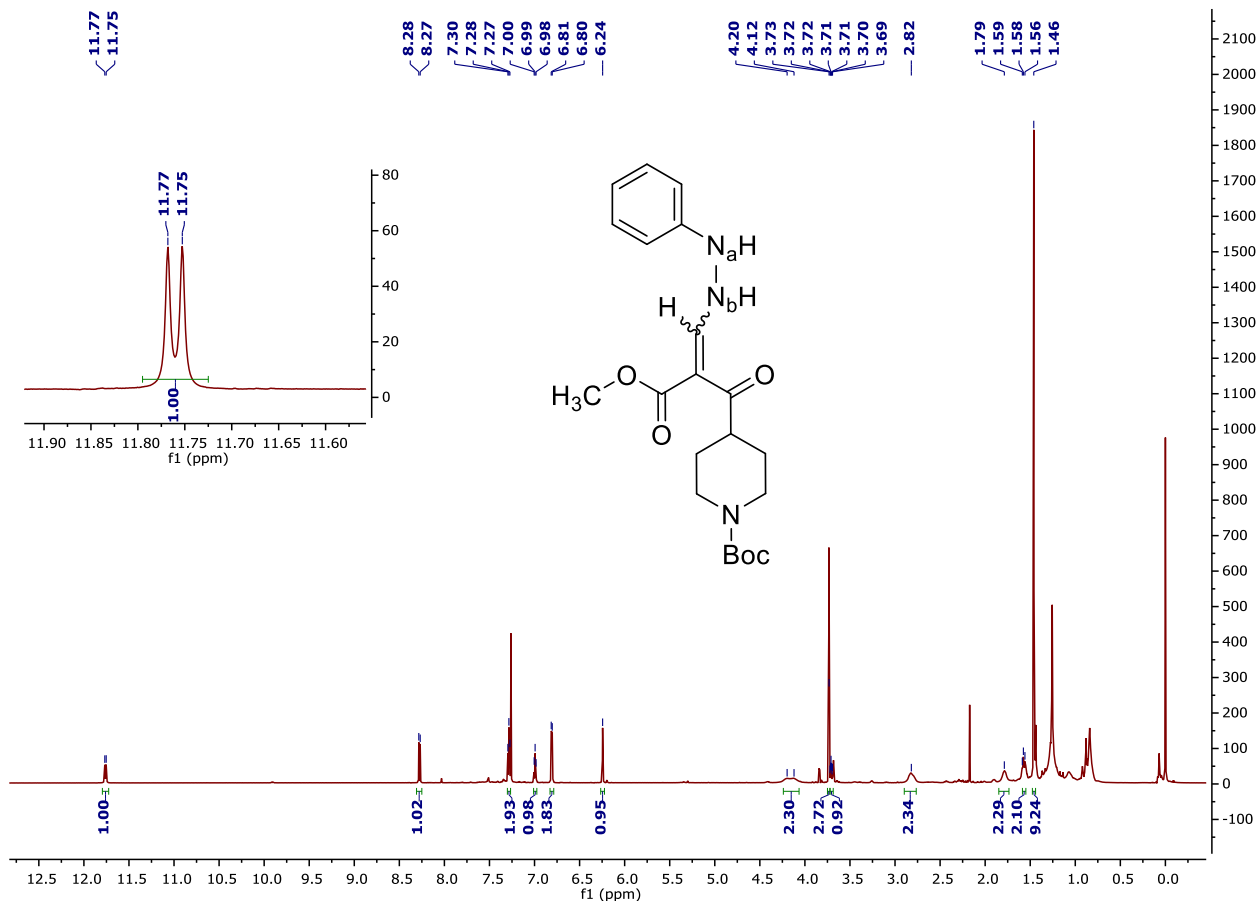

**Figure S1.** *tert*-Butyl 4-[(*E*(*Z*))-2-(methoxycarbonyl)-3-(2-phenylhydrazinyl)prop-2-enoyl]piperidine-1-carboxylate (**4a**). <sup>1</sup>H NMR spectrum (700 MHz, CDCl<sub>3</sub>).

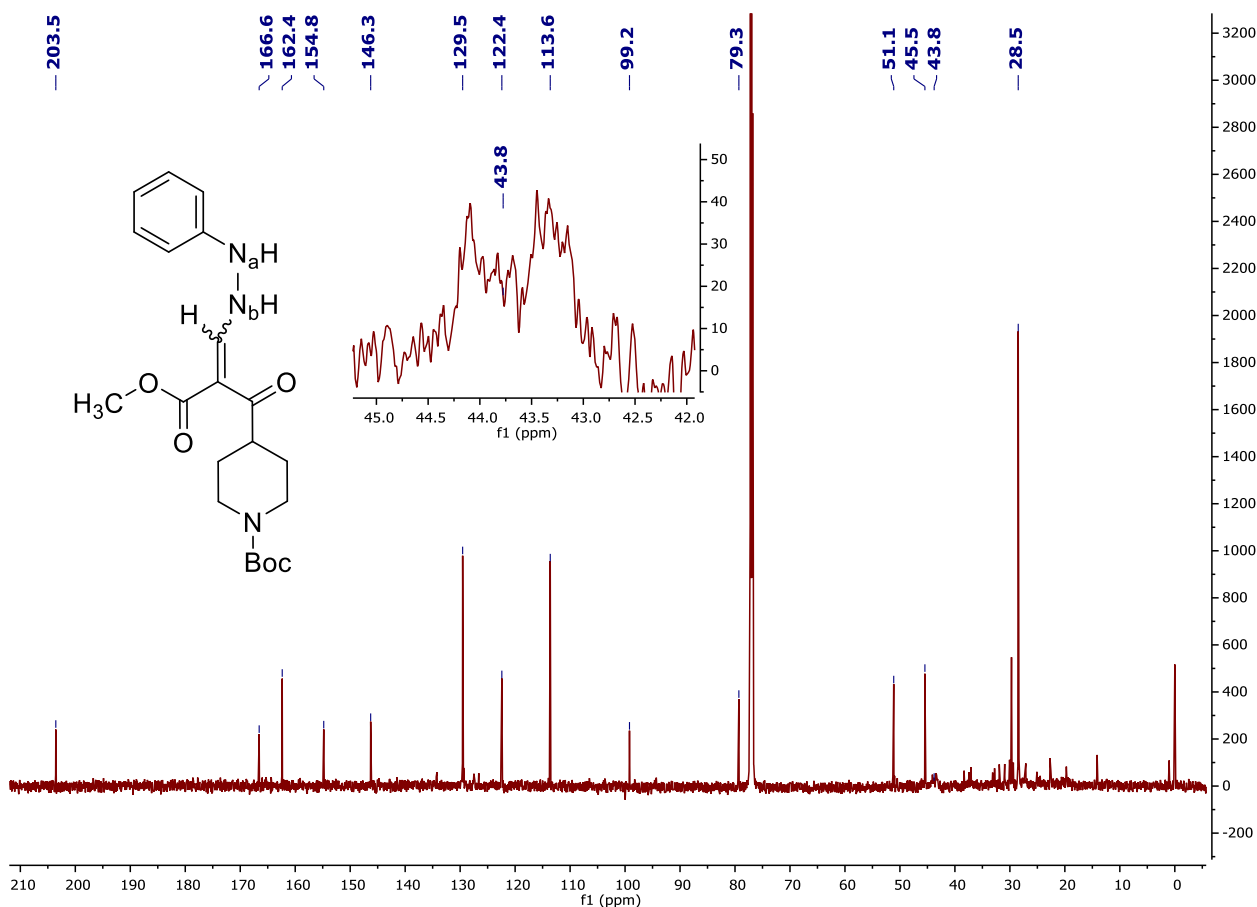

**Figure S2.** *tert*-Butyl 4-[(*E*(*Z*))-2-(methoxycarbonyl)-3-(2-phenylhydrazinyl)prop-2-enoyl]piperidine-1-carboxylate (**4a**). <sup>13</sup>C NMR spectrum (176 MHz, CDCl<sub>3</sub>).

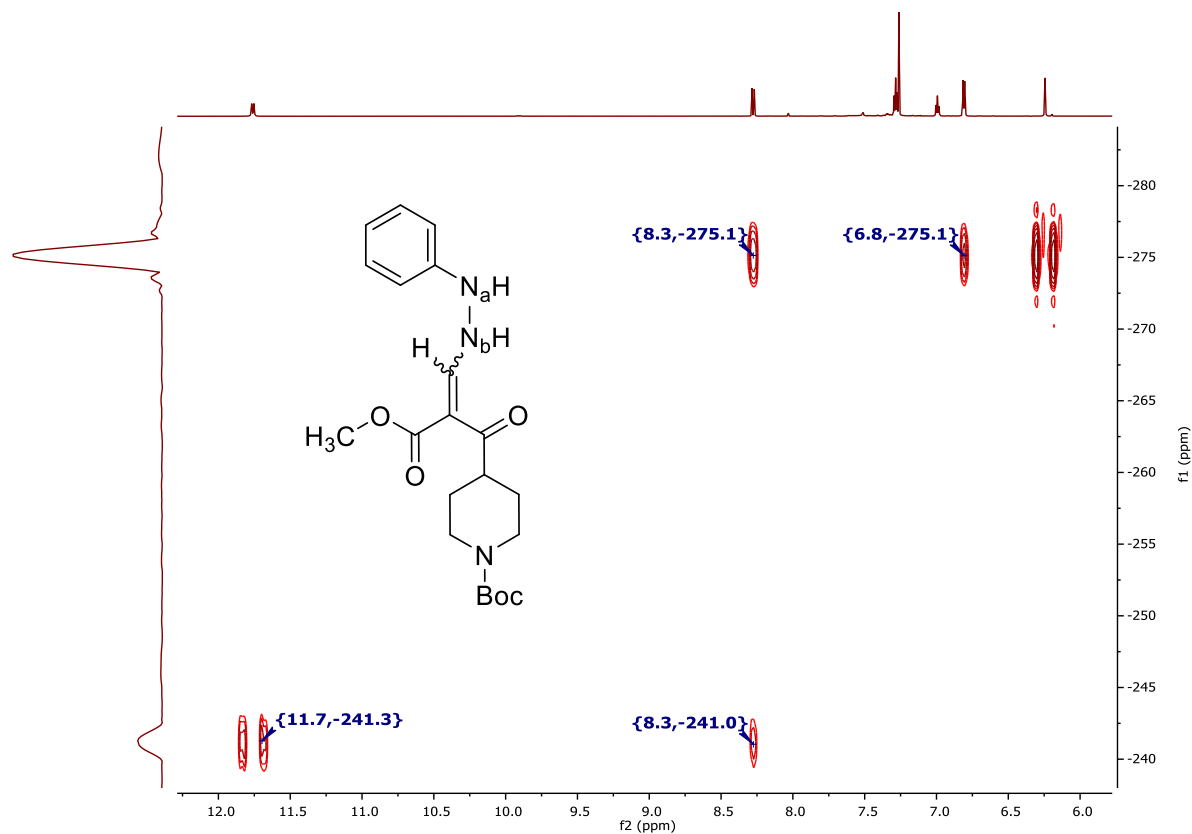

**Figure S3.** *tert*-Butyl 4-[(2*E*(*Z*))-2-(methoxycarbonyl)-3-(2-phenylhydrazinyl)prop-2-enoyl]piperidine-1-carboxylate (4a).  $^1\text{H}$ - $^{15}\text{N}$  HMBC spectrum (71 MHz,  $\text{CDCl}_3$ ).

# Compound Spectrum SmartFormula Report

## Analysis Info

Analysis Name D:\Data\GMP-601-E\_tarpinis.d  
 Method DirectInfusion\_TuneLow\_pos.m  
 Sample Name GMP-601-E\_tarpinis  
 Comment AB

Acquisition Date 12/5/2020 1:48:04 AM  
 Operator hplc  
 Instrument micrOTOF-Q III 8228888.20448

## Acquisition Parameter

|             |            |                       |           |                  |           |
|-------------|------------|-----------------------|-----------|------------------|-----------|
| Source Type | ESI        | Ion Polarity          | Positive  | Set Nebulizer    | 0.4 Bar   |
| Focus       | Not active | Set Capillary         | 4500 V    | Set Dry Heater   | 180 °C    |
| Scan Begin  | 50 m/z     | Set End Plate Offset  | -500 V    | Set Dry Gas      | 4.0 l/min |
| Scan End    | 1000 m/z   | Set Collision Cell RF | 140.0 Vpp | Set Divert Valve | Waste     |

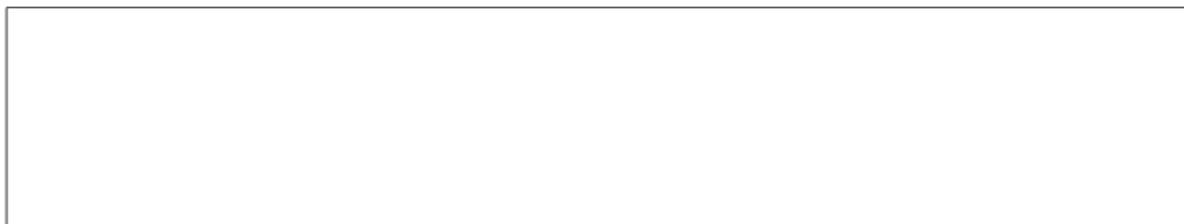

| #    | RT [min] | Area | Int. Type       | I    | S/N  | Chromatogram | Max. m/z | FWHM [min] |
|------|----------|------|-----------------|------|------|--------------|----------|------------|
| n.a. | 9.3      | n.a. | Single spectrum | n.a. | n.a. | n.a.         | 426.2001 | n.a.       |

## +MS, 9.3min #555

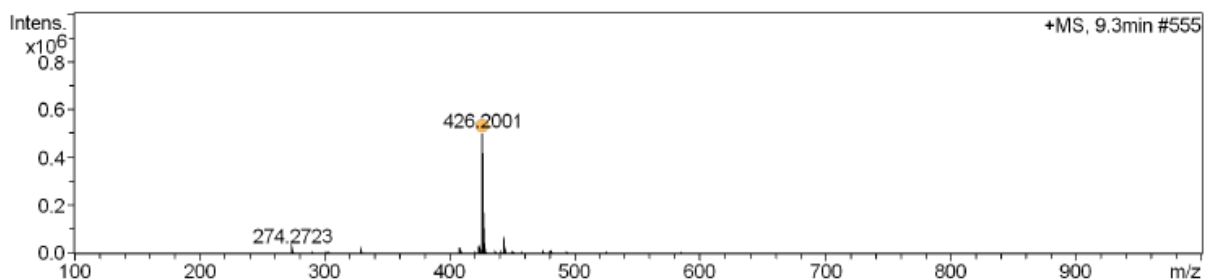

| Meas. m/z | # | Ion Formula                                                     | m/z      | err [ppm] | mSigma | # Sigma | Score  | rdb | e <sup>-</sup> Conf | N-Rule |
|-----------|---|-----------------------------------------------------------------|----------|-----------|--------|---------|--------|-----|---------------------|--------|
| 426.2001  | 1 | C <sub>21</sub> H <sub>29</sub> N <sub>3</sub> NaO <sub>5</sub> | 426.1999 | -0.5      | 7.3    | 1       | 100.00 | 8.5 | even                | ok     |

**Figure S4.** *tert*-Butyl 4-[(2*E*(*Z*))-2-(methoxycarbonyl)-3-(2-phenylhydrazinyl)prop-2-enoyl]piperidine-1-carboxylate (4a). HRMS (ESI-TOF).

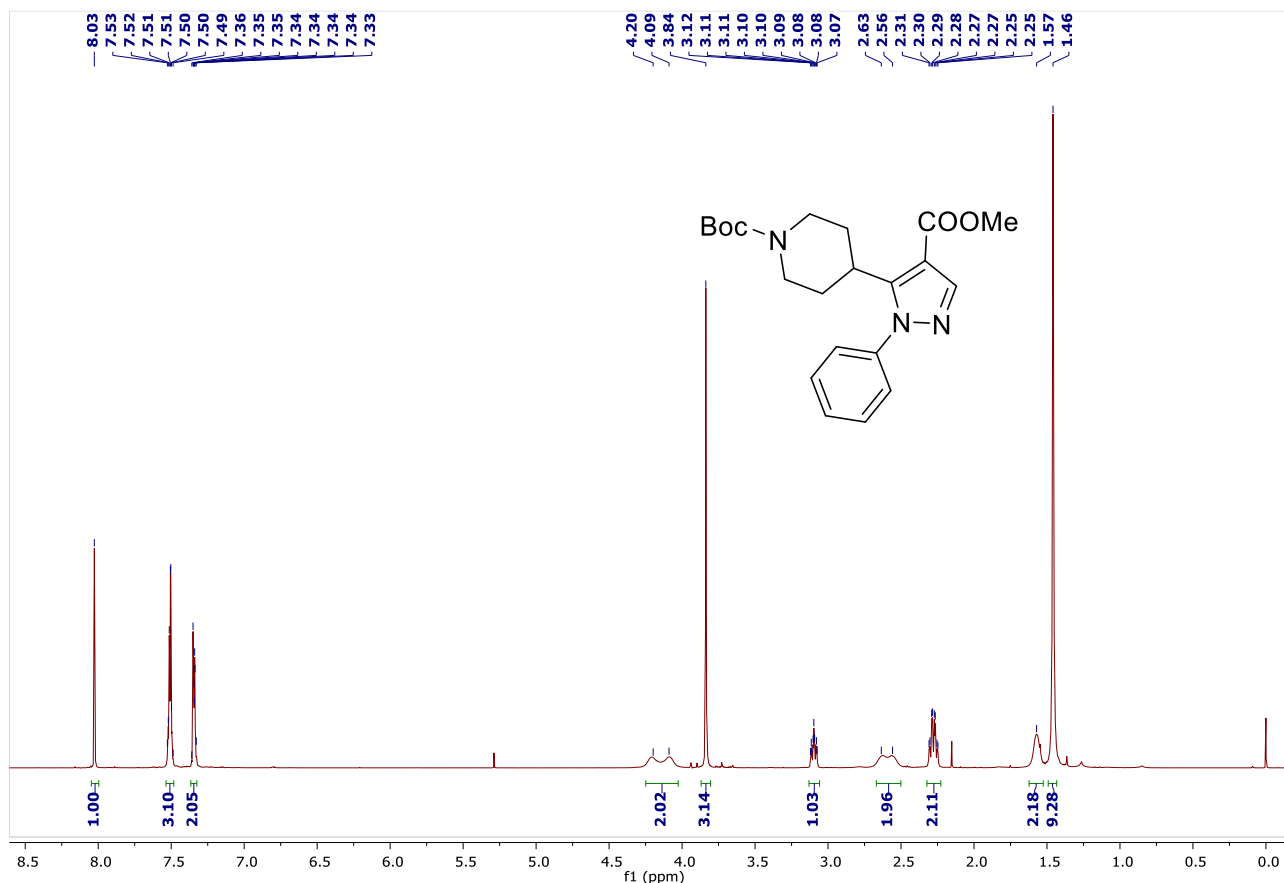

Figure S5. *tert*-Butyl 4-[4-(methoxycarbonyl)-1-phenyl-1*H*-pyrazol-5-yl]piperidine-1-carboxylate (5a). <sup>1</sup>H NMR spectrum (700 MHz, CDCl<sub>3</sub>).

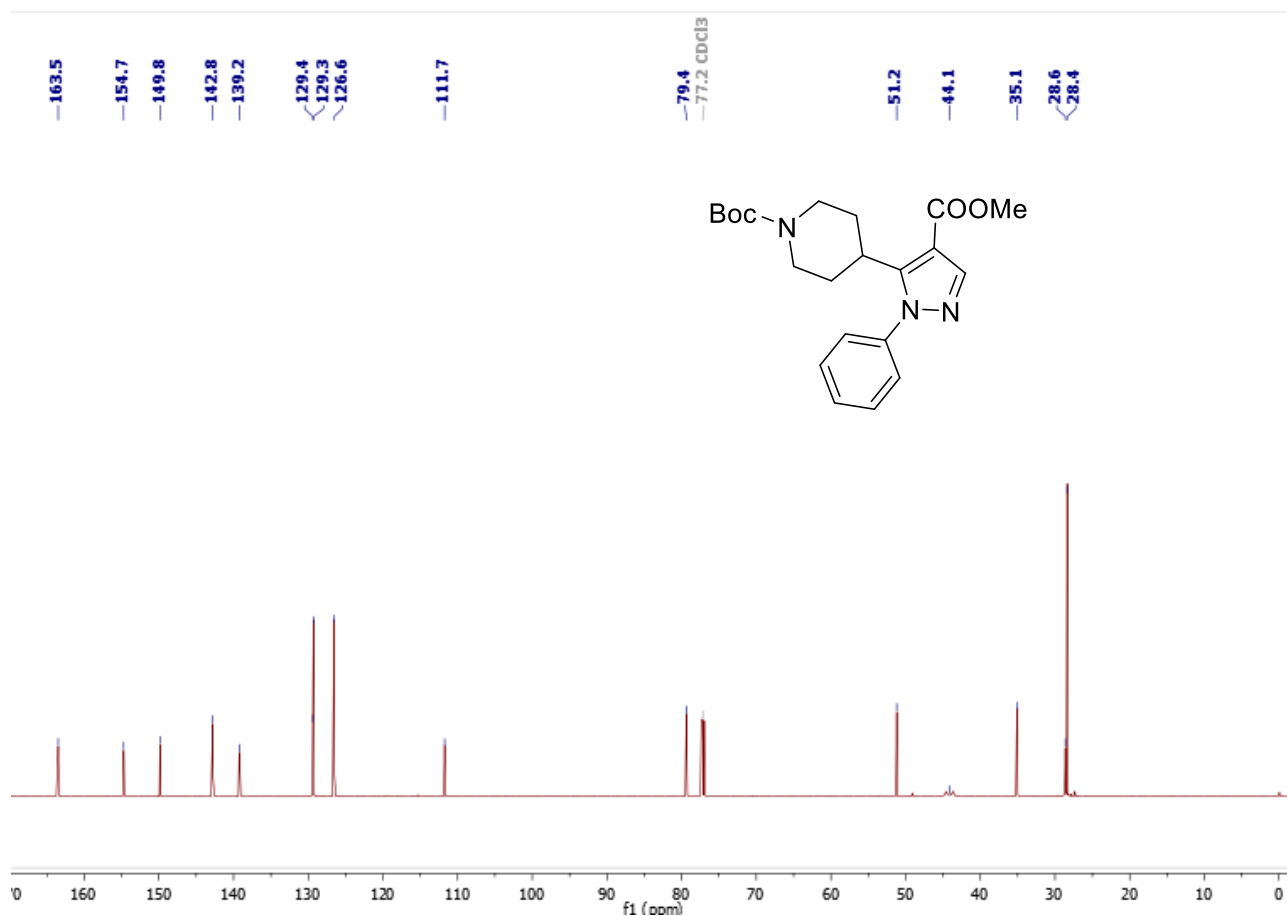

Figure S6. *tert*-Butyl 4-[4-(methoxycarbonyl)-1-phenyl-1*H*-pyrazol-5-yl]piperidine-1-carboxylate (5a). <sup>13</sup>C NMR spectrum (176 MHz, CDCl<sub>3</sub>).

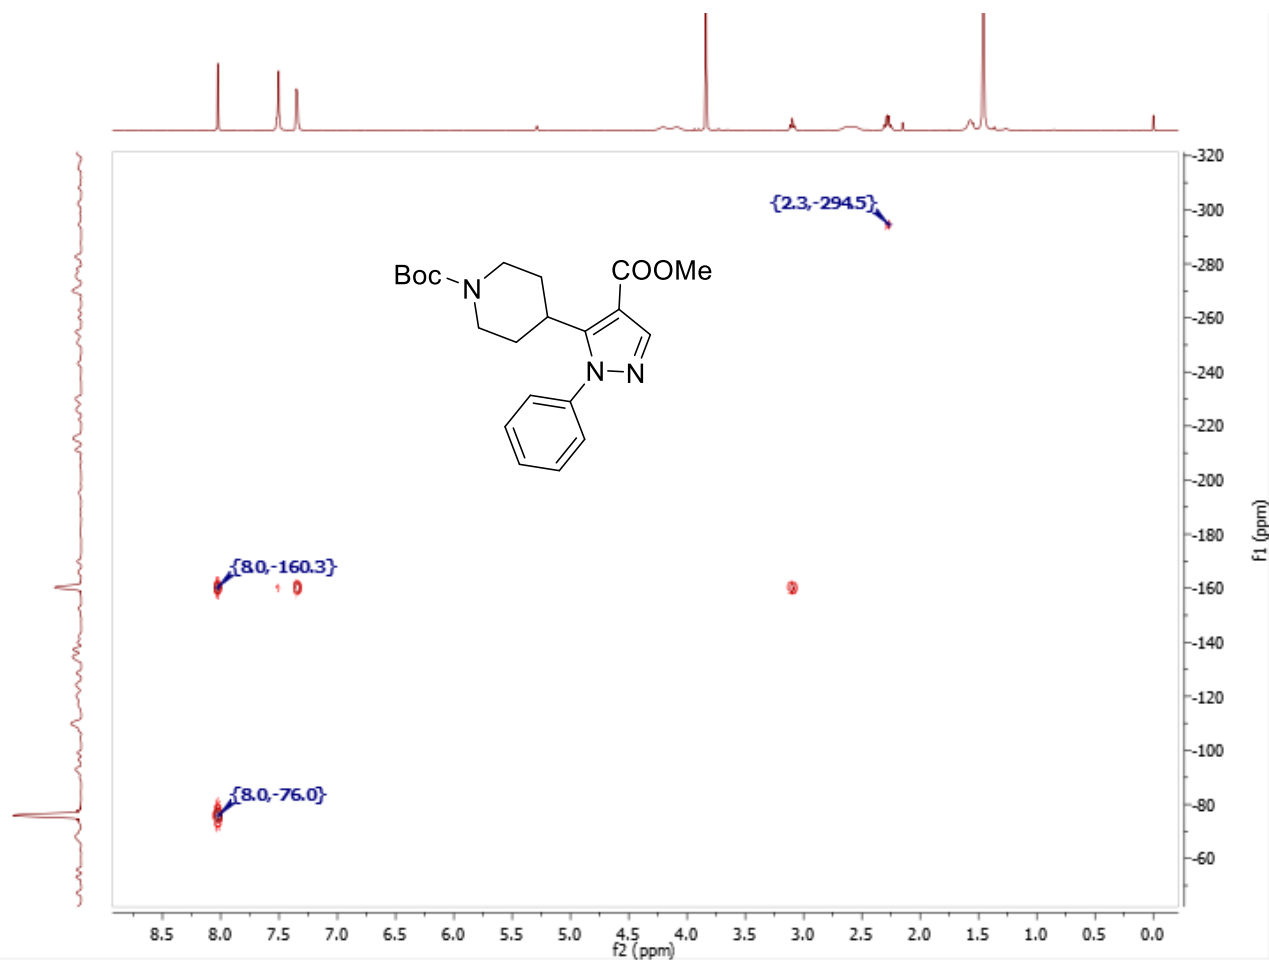

**Figure S7.** *tert*-Butyl 4-[4-(methoxycarbonyl)-1-phenyl-1*H*-pyrazol-5-yl]piperidine-1-carboxylate (5a).  $^1\text{H}$ - $^{15}\text{N}$  HMBC spectrum (71 MHz,  $\text{CDCl}_3$ ).

# Compound Spectrum SmartFormula Report

## Analysis Info

Analysis Name D:\Data\GMA-021.d  
Method DirectInfusion\_TuneLow\_pos.m  
Sample Name GMA-021  
Comment SB

Acquisition Date 11/27/2018 11:59:44 AM

Operator hplc  
Instrument micrOTOF-Q III 8228888.20448

## Acquisition Parameter

|             |            |                       |           |                  |           |
|-------------|------------|-----------------------|-----------|------------------|-----------|
| Source Type | ESI        | Ion Polarity          | Positive  | Set Nebulizer    | 0.4 Bar   |
| Focus       | Not active | Set Capillary         | 4500 V    | Set Dry Heater   | 180 °C    |
| Scan Begin  | 50 m/z     | Set End Plate Offset  | -500 V    | Set Dry Gas      | 4.0 l/min |
| Scan End    | 1000 m/z   | Set Collision Cell RF | 140.0 Vpp | Set Divert Valve | Waste     |

| #    | RT [min] | Area | Int. Type       | I    | S/N  | Chromatogram | Max. m/z | FWHM [min] |
|------|----------|------|-----------------|------|------|--------------|----------|------------|
| n.a. | 0.2      | n.a. | Single spectrum | n.a. | n.a. | n.a.         | 304.2632 | n.a.       |
| n.a. | 4.1      | n.a. | Single spectrum | n.a. | n.a. | n.a.         | 408.1894 | n.a.       |

## +MS, 4.1min #246

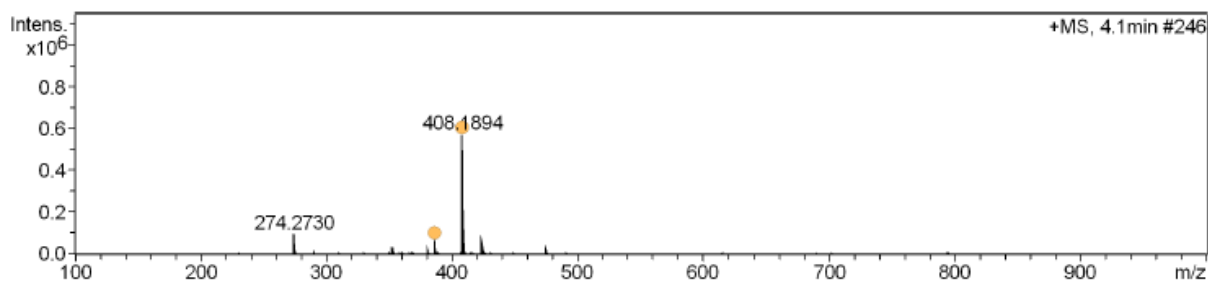

| Meas. m/z | # | Ion Formula  | m/z      | err [ppm] | mSigma | # Sigma | Score  | rdB | e <sup>-</sup> Conf | N-Rule |
|-----------|---|--------------|----------|-----------|--------|---------|--------|-----|---------------------|--------|
| 386.2075  | 1 | C21H28N3O4   | 386.2074 | -0.2      | 5.8    | 1       | 100.00 | 9.5 | even                | ok     |
| 408.1894  | 1 | C21H27N3NaO4 | 408.1894 | 0.1       | 1.4    | 1       | 100.00 | 9.5 | even                | ok     |

**Figure S8.** *tert*-Butyl 4-[4-(methoxycarbonyl)-1-phenyl-1*H*-pyrazol-5-yl]piperidine-1-carboxylate (5a). HRMS (ESI-TOF).

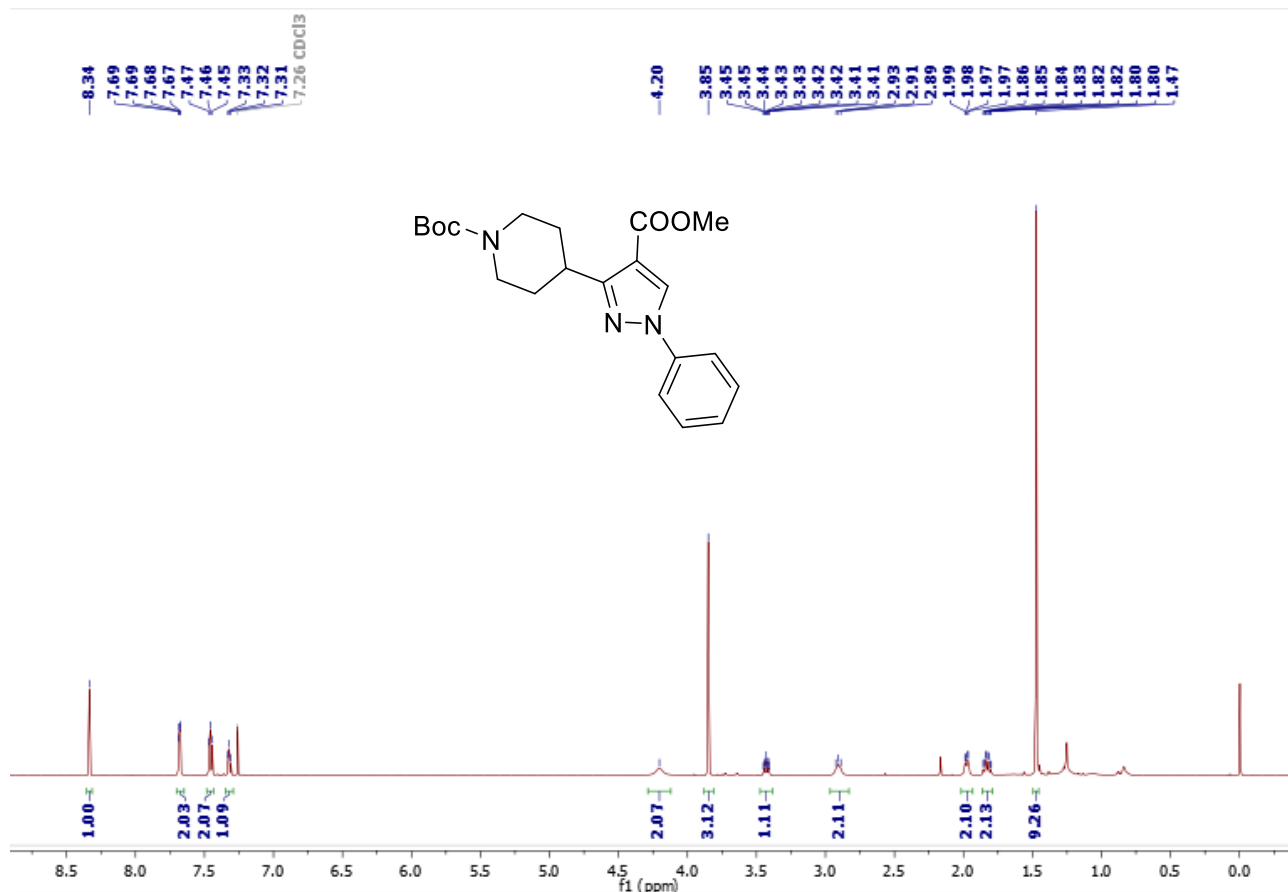

Figure S9. *tert*-Butyl 4-[4-(methoxycarbonyl)-1-phenyl-1*H*-pyrazol-3-yl]piperidine-1-carboxylate (6a). <sup>1</sup>H NMR spectrum (700 MHz, CDCl<sub>3</sub>).

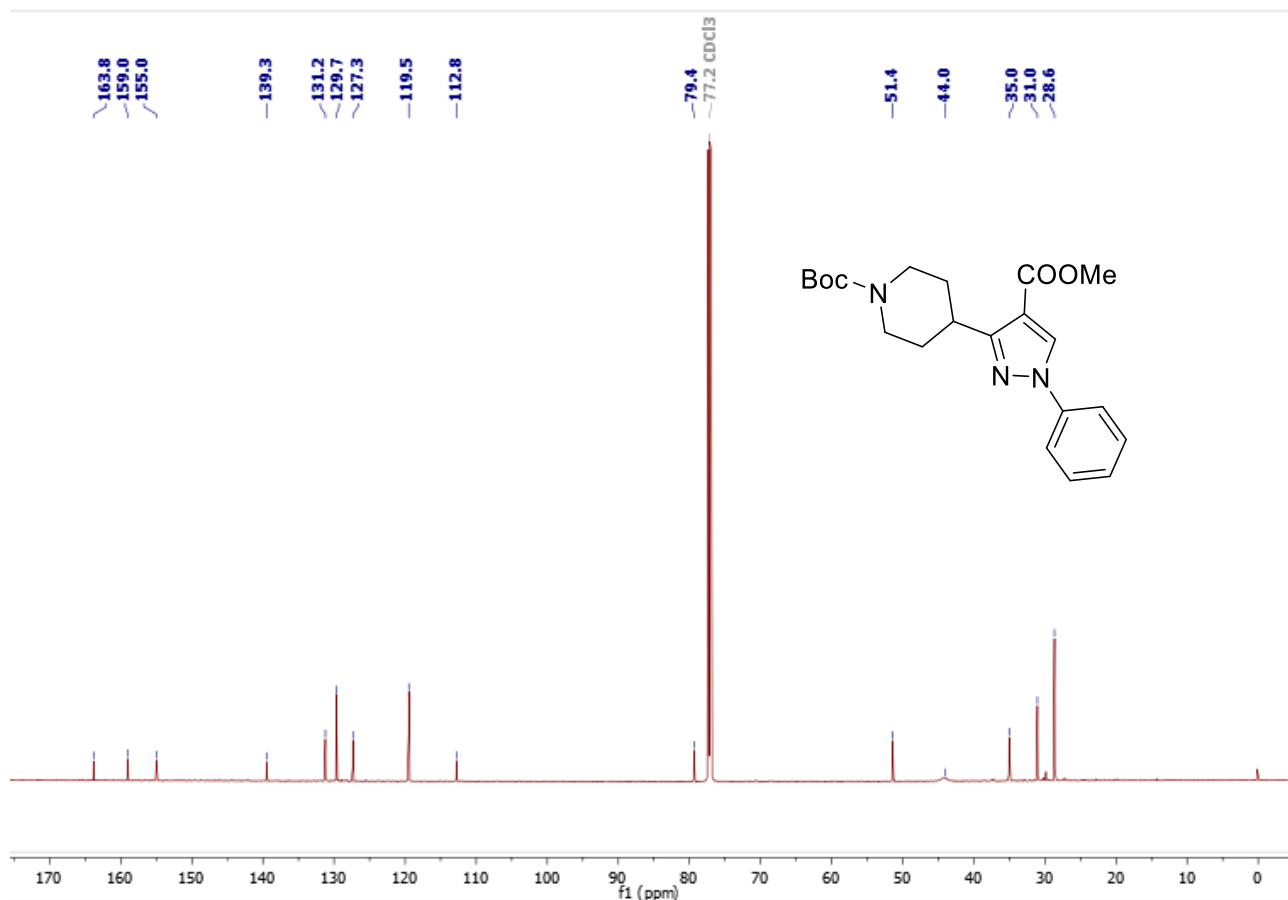

Figure S10. *tert*-Butyl 4-[4-(methoxycarbonyl)-1-phenyl-1*H*-pyrazol-3-yl]piperidine-1-carboxylate (6a). <sup>13</sup>C NMR spectrum (176 MHz, CDCl<sub>3</sub>).



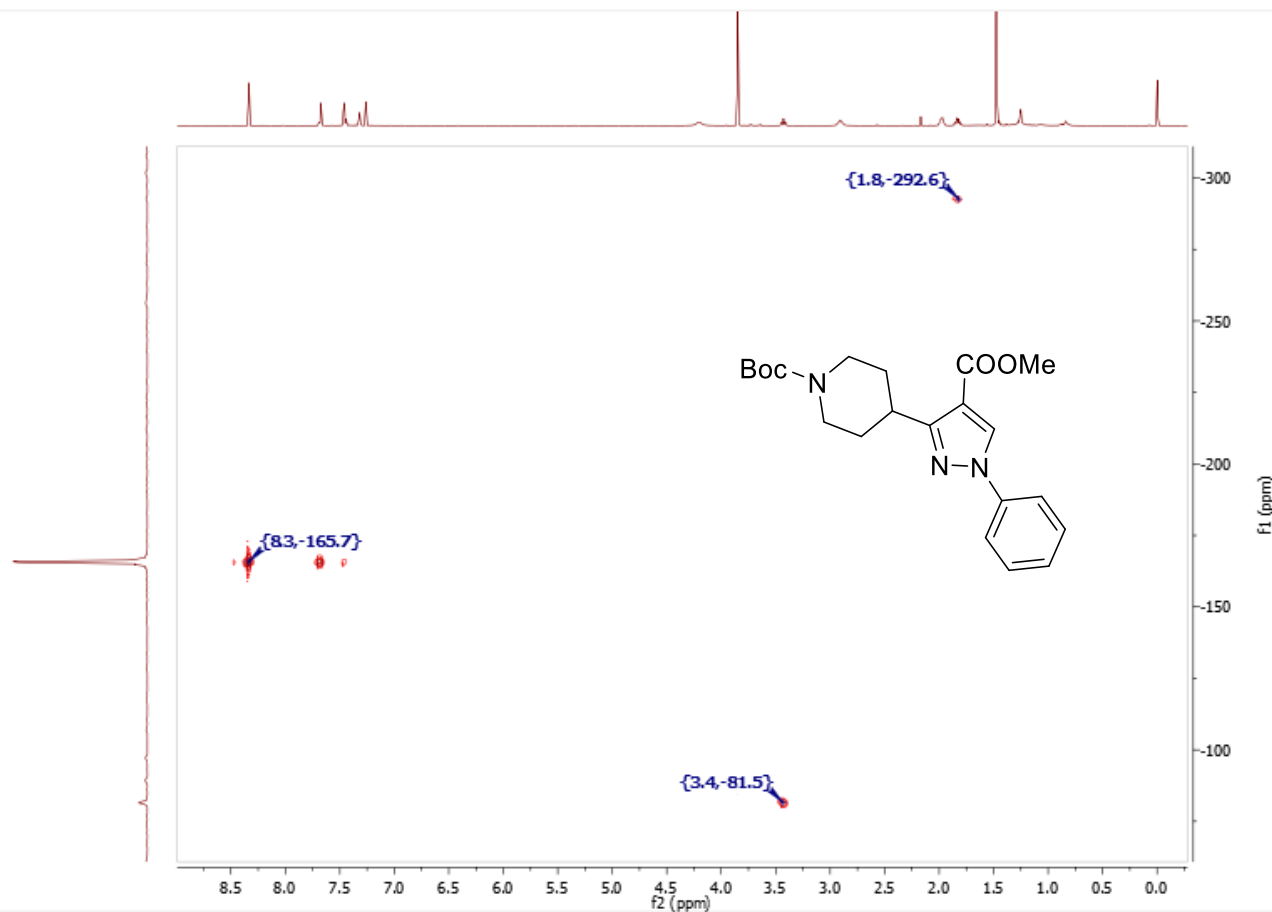

**Figure S11.** *tert*-Butyl 4-[4-(methoxycarbonyl)-1-phenyl-1*H*-pyrazol-3-yl]piperidine-1-carboxylate (6a).  $^1\text{H}$ - $^{15}\text{N}$  HMBC spectrum (71 MHz,  $\text{CDCl}_3$ ).

## Compound Spectrum SmartFormula Report

### Analysis Info

Analysis Name D:\Data\GMP-601-E1.d  
 Method DirectInfusion\_TuneLow\_pos.m  
 Sample Name GMP-601-E1  
 Comment AB

Acquisition Date 2/4/2021 11:29:42 PM

Operator hplc  
 Instrument micrOTOF-Q III 8228888.20448

### Acquisition Parameter

|             |            |                       |           |                  |           |
|-------------|------------|-----------------------|-----------|------------------|-----------|
| Source Type | ESI        | Ion Polarity          | Positive  | Set Nebulizer    | 0.4 Bar   |
| Focus       | Not active | Set Capillary         | 4500 V    | Set Dry Heater   | 180 °C    |
| Scan Begin  | 50 m/z     | Set End Plate Offset  | -500 V    | Set Dry Gas      | 4.0 l/min |
| Scan End    | 1000 m/z   | Set Collision Cell RF | 140.0 Vpp | Set Divert Valve | Waste     |

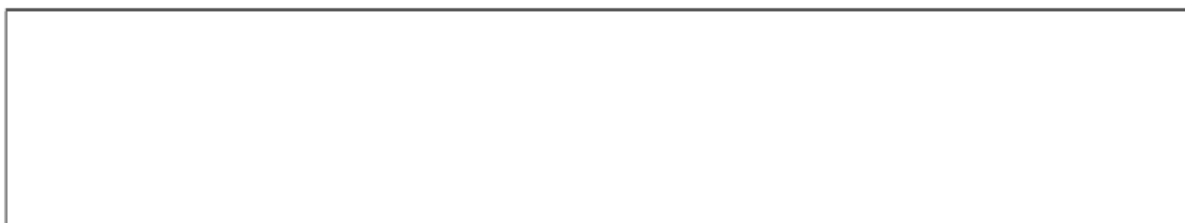

| #    | RT [min] | Area | Int. Type       | I    | S/N  | Chromatogram | Max. m/z | FWHM [min] |
|------|----------|------|-----------------|------|------|--------------|----------|------------|
| n.a. | 2.1      | n.a. | Single spectrum | n.a. | n.a. | n.a.         | 408.1894 | n.a.       |

### +MS, 2.1min #125

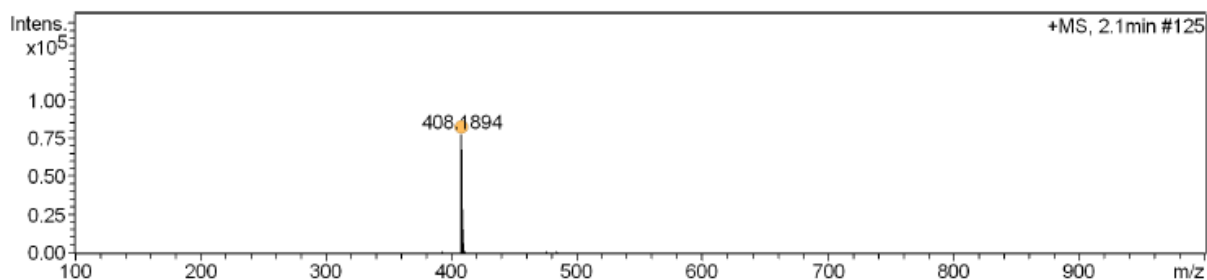

| Meas. m/z | # | Ion Formula                                                     | m/z      | err [ppm] | mSigma | # Sigma | Score  | rdb | e <sup>-</sup> Conf | N-Rule |
|-----------|---|-----------------------------------------------------------------|----------|-----------|--------|---------|--------|-----|---------------------|--------|
| 408.1894  | 1 | C <sub>21</sub> H <sub>27</sub> N <sub>3</sub> NaO <sub>4</sub> | 408.1894 | -0.1      | 5.8    | 1       | 100.00 | 9.5 | even                | ok     |

**Figure S12.** *tert*-Butyl 4-[4-(methoxycarbonyl)-1-phenyl-1*H*-pyrazol-3-yl]piperidine-1-carboxylate (6a). HRMS (ESI-TOF).

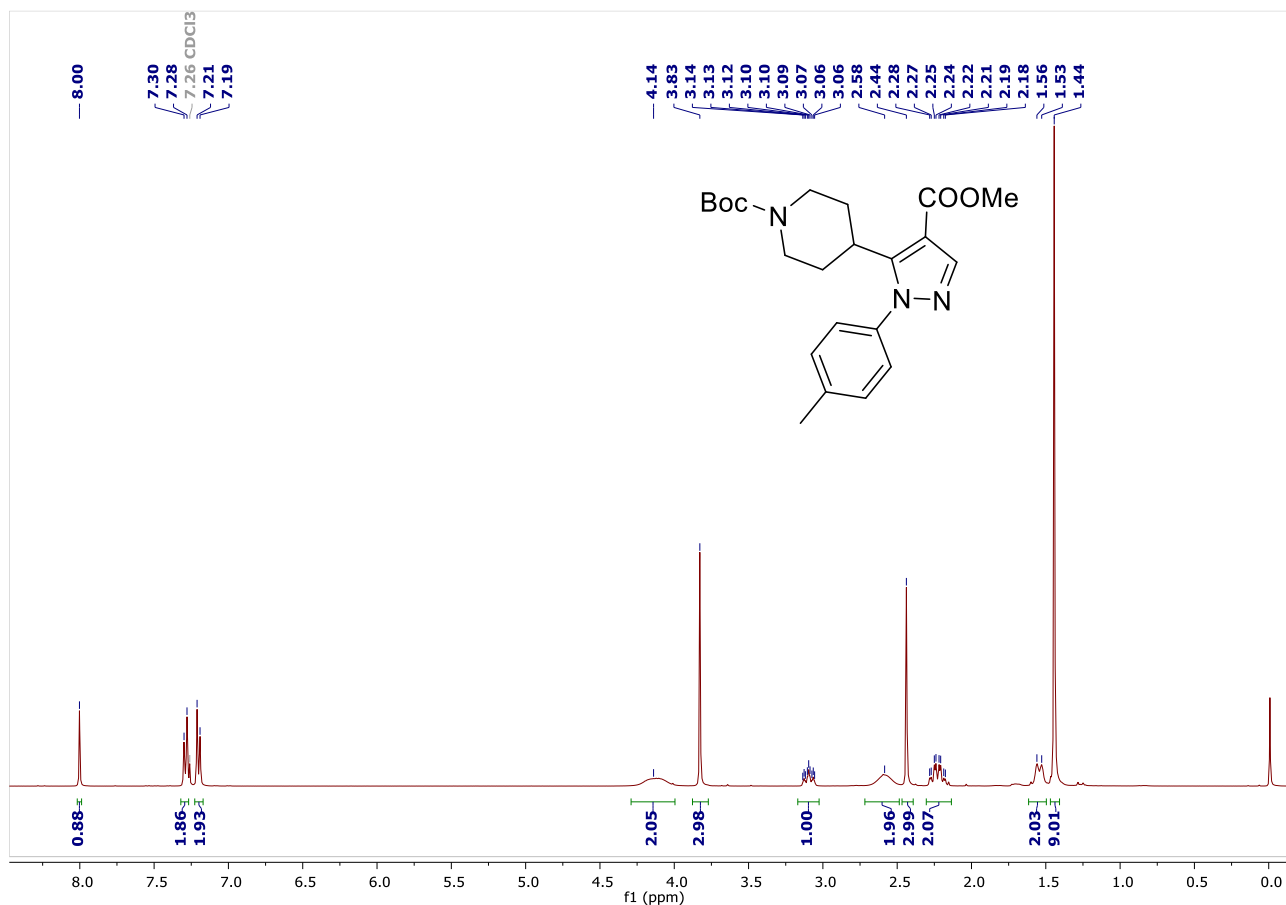

Figure S13. *tert*-Butyl 4-[4-(methoxycarbonyl)-1-(4-methylphenyl)-1*H*-pyrazol-5-yl]piperidine-1-carboxylate (5b). <sup>1</sup>H NMR spectrum (400 MHz, CDCl<sub>3</sub>).

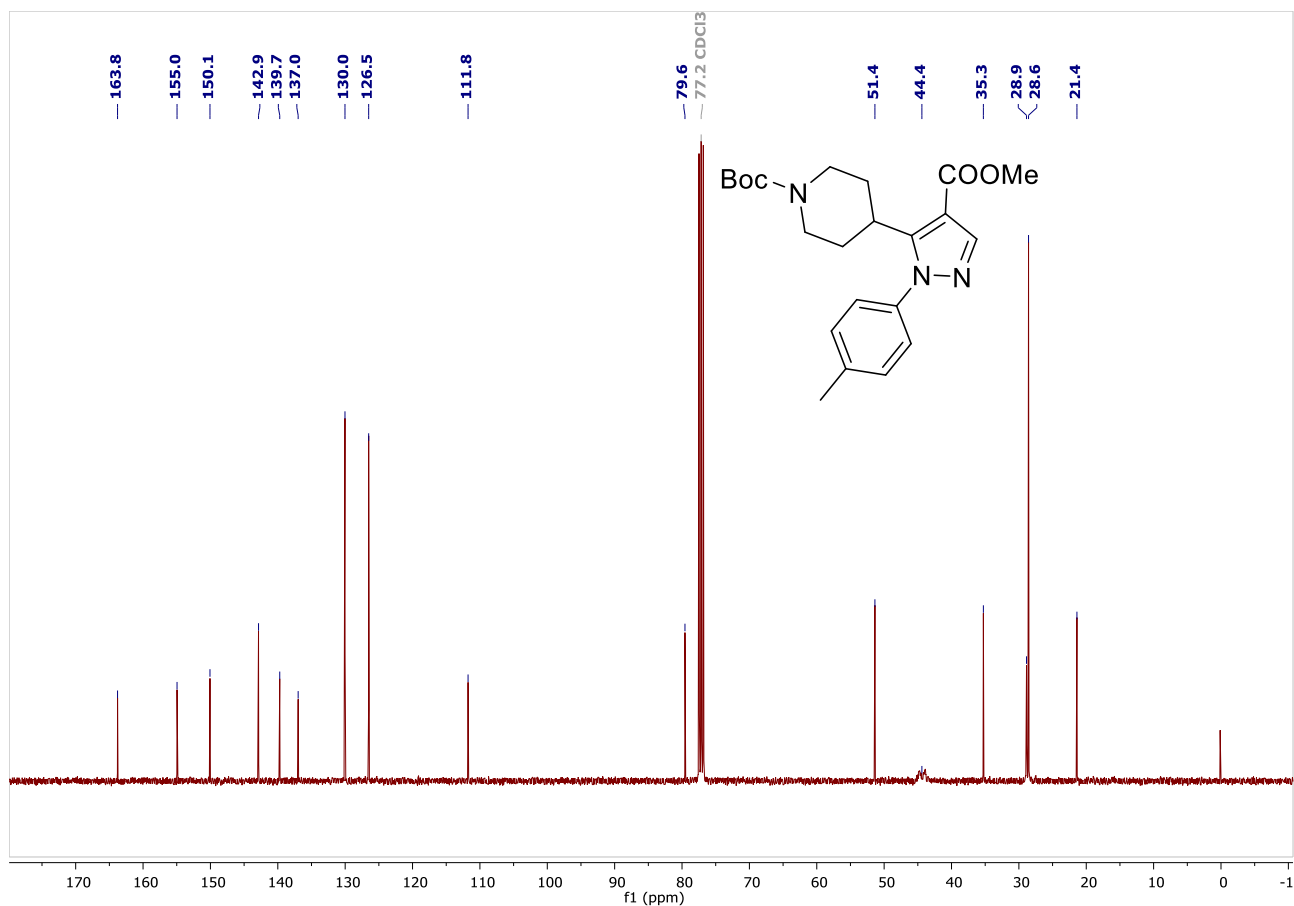

Figure S14. *tert*-Butyl 4-[4-(methoxycarbonyl)-1-(4-methylphenyl)-1*H*-pyrazol-5-yl]piperidine-1-carboxylate (5b). <sup>13</sup>C NMR spectrum (101 MHz, CDCl<sub>3</sub>).

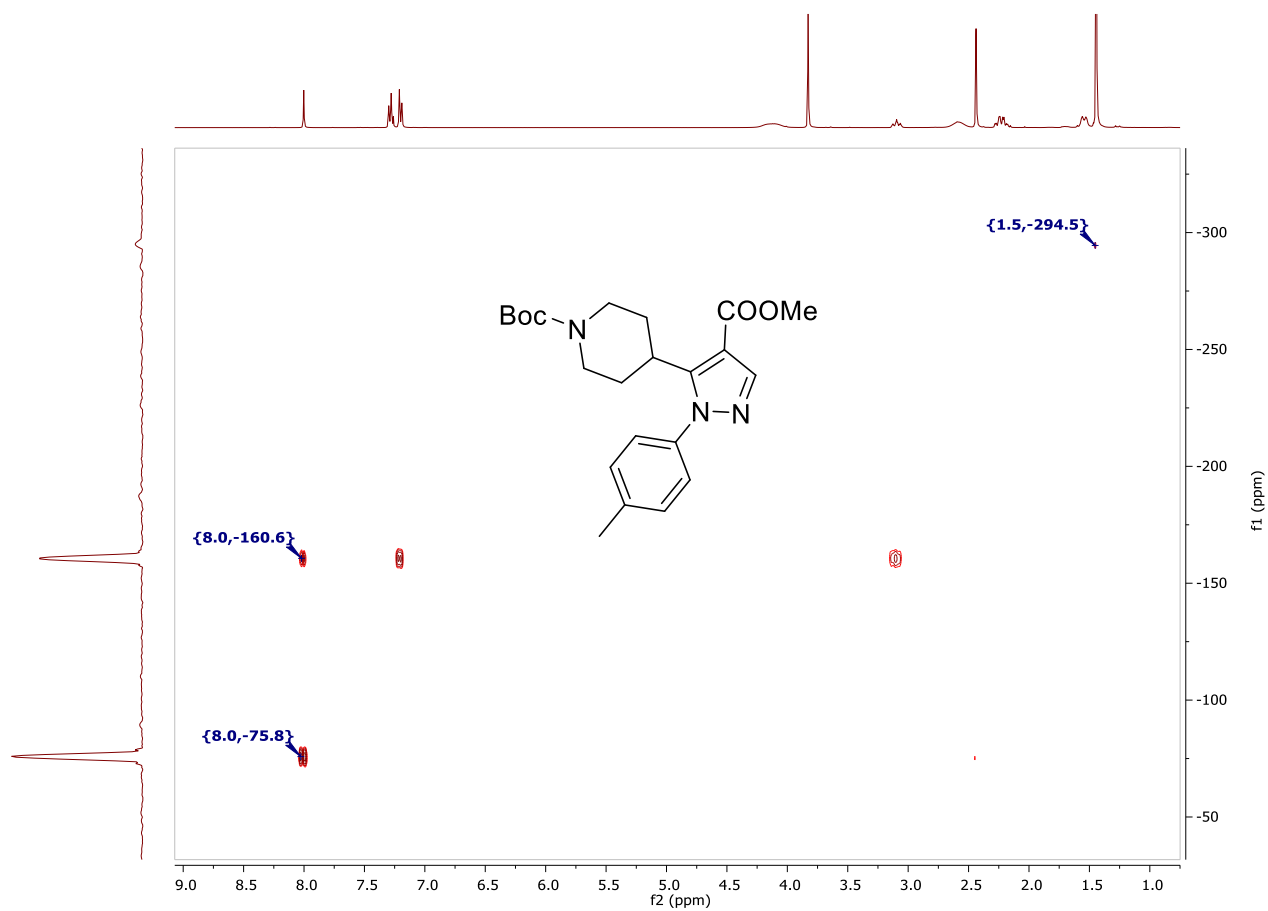

**Figure S15.** *tert*-Butyl 4-[4-(methoxycarbonyl)-1-(4-methylphenyl)-1*H*-pyrazol-5-yl]piperidine-1-carboxylate (5b). <sup>1</sup>H-<sup>15</sup>N HMBC spectrum (41 MHz, CDCl<sub>3</sub>).

# Compound Spectrum SmartFormula Report

## Analysis Info

Analysis Name D:\Data\GMP-007.d  
 Method DirectInfusion\_TuneLow\_pos.m  
 Sample Name GMP-007  
 Comment SB

Acquisition Date 11/27/2018 11:44:50 AM

Operator hplc  
 Instrument micrOTOF-Q III 8228888.20448

## Acquisition Parameter

|             |            |                       |           |                  |           |
|-------------|------------|-----------------------|-----------|------------------|-----------|
| Source Type | ESI        | Ion Polarity          | Positive  | Set Nebulizer    | 0.4 Bar   |
| Focus       | Not active | Set Capillary         | 4500 V    | Set Dry Heater   | 180 °C    |
| Scan Begin  | 50 m/z     | Set End Plate Offset  | -500 V    | Set Dry Gas      | 4.0 l/min |
| Scan End    | 1000 m/z   | Set Collision Cell RF | 140.0 Vpp | Set Divert Valve | Waste     |

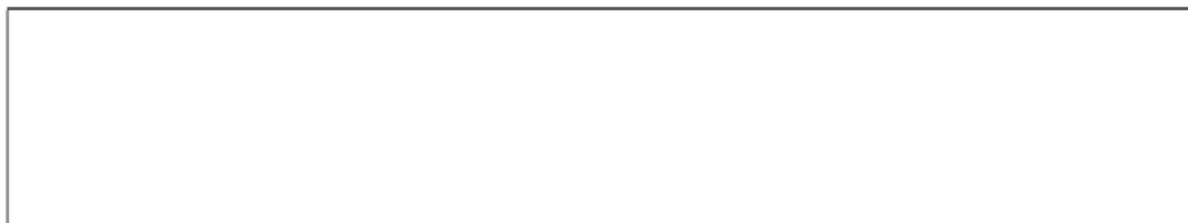

| #    | RT [min] | Area | Int. Type       | I    | S/N  | Chromatogram | Max. m/z | FWHM [min] |
|------|----------|------|-----------------|------|------|--------------|----------|------------|
| n.a. | 0.2      | n.a. | Single spectrum | n.a. | n.a. | n.a.         | 304.2634 | n.a.       |
| n.a. | 3.7      | n.a. | Single spectrum | n.a. | n.a. | n.a.         | 422.2051 | n.a.       |

## +MS, 3.7min #221

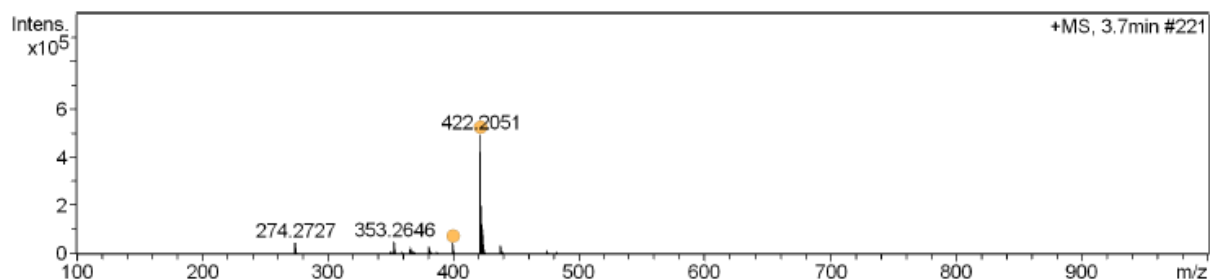

| Meas. m/z | # | Ion Formula  | m/z      | err [ppm] | mSigma | # Sigma | Score  | rdB | e <sup>-</sup> Conf | N-Rule |
|-----------|---|--------------|----------|-----------|--------|---------|--------|-----|---------------------|--------|
| 400.2231  | 1 | C22H30N3O4   | 400.2231 | -0.0      | 8.7    | 1       | 100.00 | 9.5 | even                | ok     |
| 422.2051  | 1 | C22H29N3NaO4 | 422.2050 | -0.2      | 2.1    | 1       | 100.00 | 9.5 | even                | ok     |

**Figure S16.** *tert*-Butyl 4-[4-(methoxycarbonyl)-1-(4-methylphenyl)-1*H*-pyrazol-5-yl]piperidine-1-carboxylate (5b). HRMS (ESI-TOF).

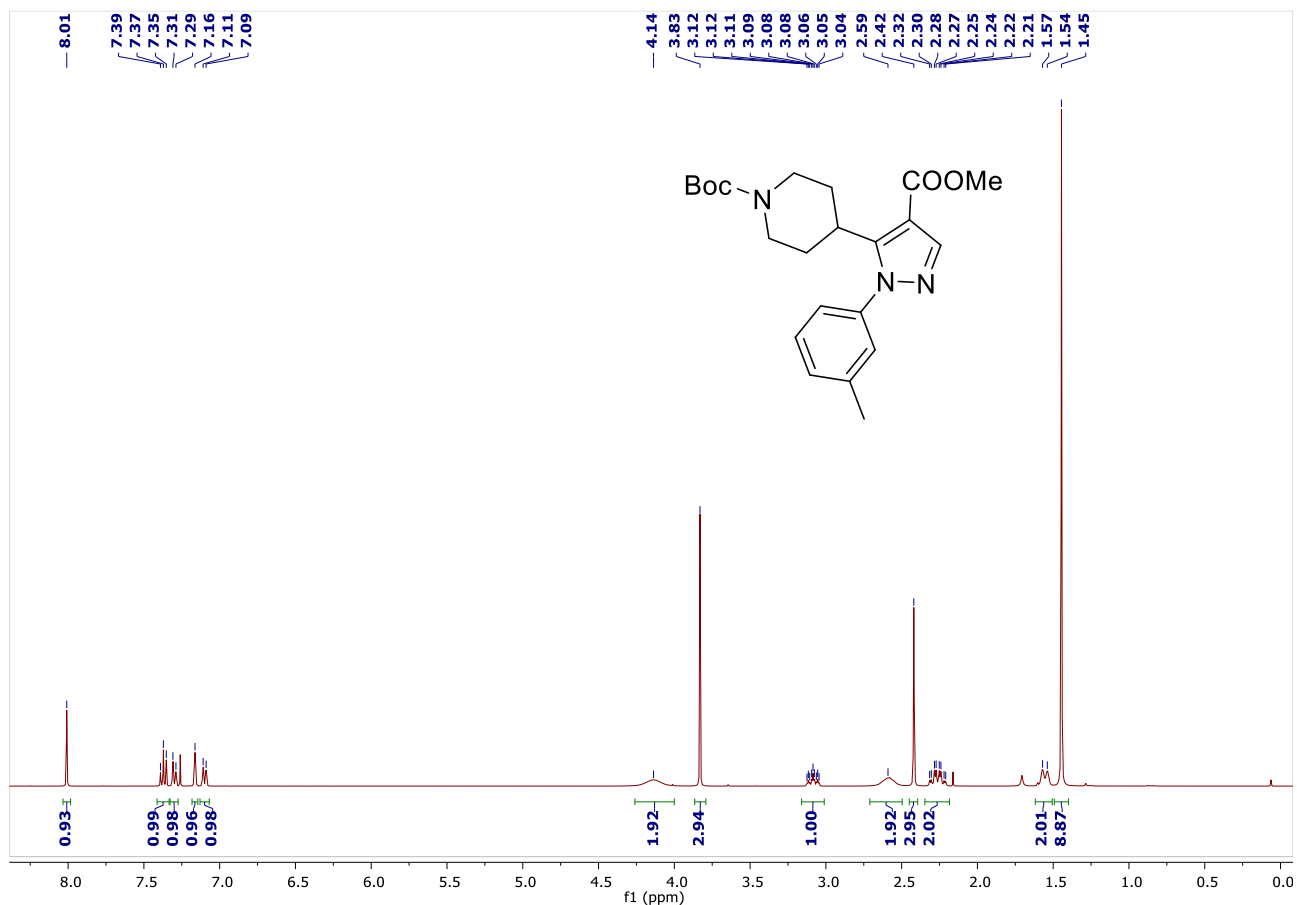

Figure S17. *tert*-Butyl 4-[4-(methoxycarbonyl)-1-(3-methylphenyl)-1*H*-pyrazol-5-yl]piperidine-1-carboxylate (5c). <sup>1</sup>H NMR spectrum (400 MHz, CDCl<sub>3</sub>).

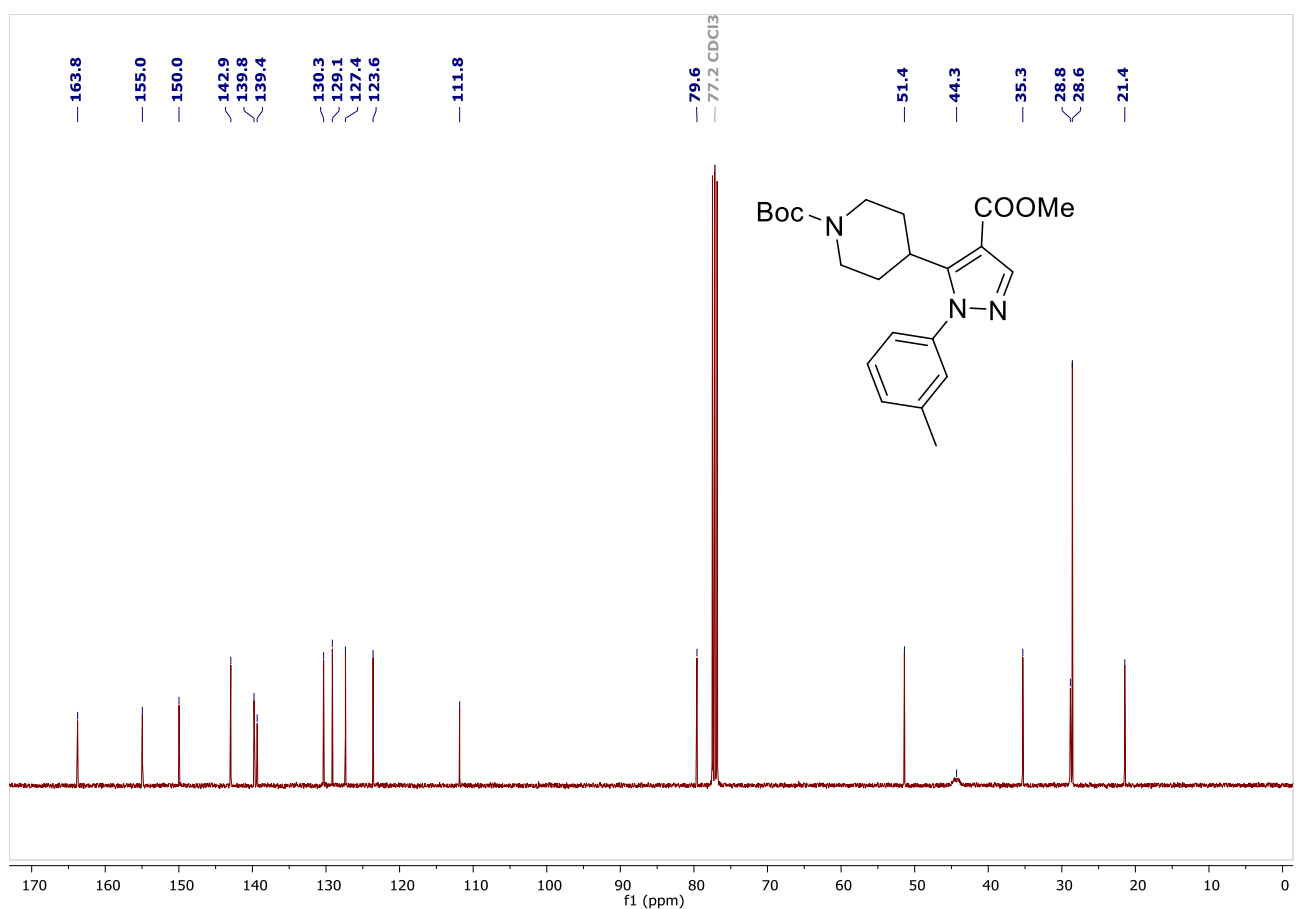

Figure S18. *tert*-Butyl 4-[4-(methoxycarbonyl)-1-(3-methylphenyl)-1*H*-pyrazol-5-yl]piperidine-1-carboxylate (5c). <sup>13</sup>C NMR spectrum (176 MHz, CDCl<sub>3</sub>).

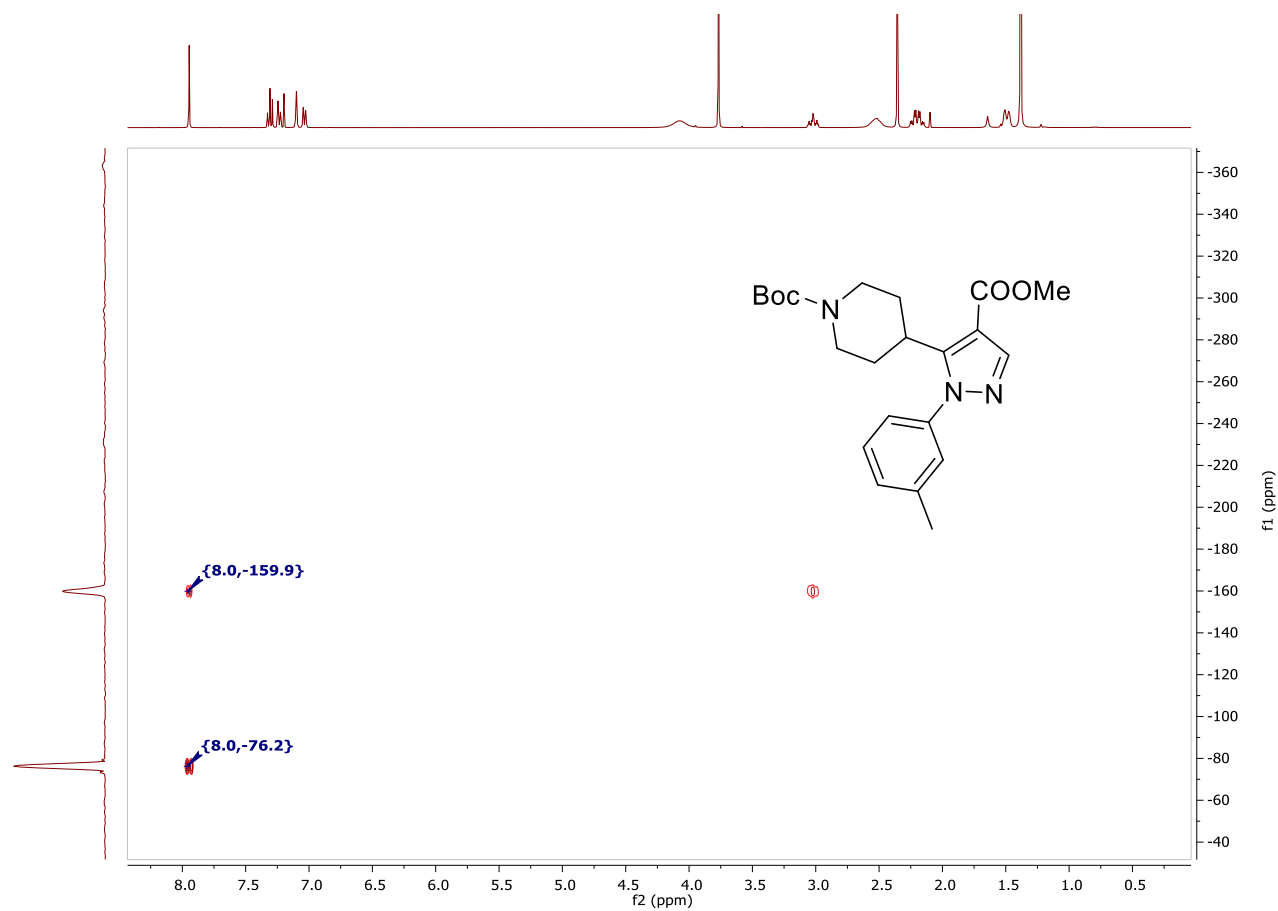

**Figure S19.** *tert*-Butyl 4-[4-(methoxycarbonyl)-1-(3-methylphenyl)-1*H*-pyrazol-5-yl]piperidine-1-carboxylate (5c).  $^{15}\text{N}$  NMR spectrum (41 MHz,  $\text{CDCl}_3$ ).

# Compound Spectrum SmartFormula Report

## Analysis Info

Analysis Name D:\Data\GMP-039.d  
 Method DirectInfusion\_TuneLow\_pos.m  
 Sample Name GMP-039  
 Comment SB

Acquisition Date 11/29/2018 12:15:34 PM

Operator hplc  
 Instrument micrOTOF-Q III 8228888.20448

## Acquisition Parameter

|             |            |                       |           |                  |           |
|-------------|------------|-----------------------|-----------|------------------|-----------|
| Source Type | ESI        | Ion Polarity          | Positive  | Set Nebulizer    | 0.4 Bar   |
| Focus       | Not active | Set Capillary         | 4500 V    | Set Dry Heater   | 180 °C    |
| Scan Begin  | 50 m/z     | Set End Plate Offset  | -500 V    | Set Dry Gas      | 4.0 l/min |
| Scan End    | 1000 m/z   | Set Collision Cell RF | 140.0 Vpp | Set Divert Valve | Waste     |

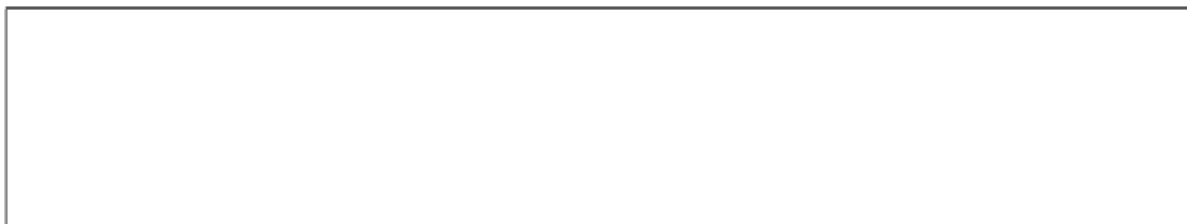

| #    | RT [min] | Area | Int. Type       | I    | S/N  | Chromatogram | Max. m/z | FWHM [min] |
|------|----------|------|-----------------|------|------|--------------|----------|------------|
| n.a. | 0.8      | n.a. | Single spectrum | n.a. | n.a. | n.a.         | 226.9519 | n.a.       |
| n.a. | 3.6      | n.a. | Single spectrum | n.a. | n.a. | n.a.         | 422.2050 | n.a.       |

## +MS, 3.6min #216

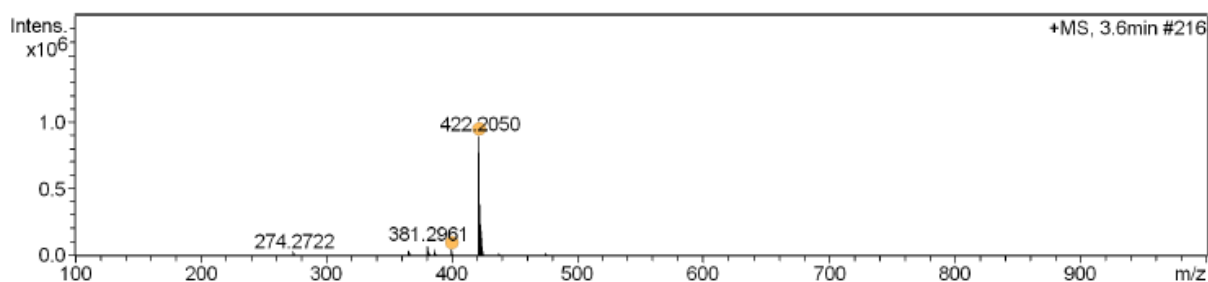

| Meas. m/z | # | Ion Formula  | m/z      | err [ppm] | mSigma | # Sigma | Score  | rdb | e <sup>-</sup> Conf | N-Rule |
|-----------|---|--------------|----------|-----------|--------|---------|--------|-----|---------------------|--------|
| 400.2223  | 1 | C22H30N3O4   | 400.2231 | -2.0      | 41.0   | 1       | 100.00 | 9.5 | even                | ok     |
| 422.2050  | 1 | C22H29N3NaO4 | 422.2050 | -0.0      | 11.7   | 1       | 100.00 | 9.5 | even                | ok     |

**Figure S20.** *tert*-Butyl 4-[4-(methoxycarbonyl)-1-(3-methylphenyl)-1*H*-pyrazol-5-yl]piperidine-1-carboxylate (5c). HRMS (ESI-TOF).



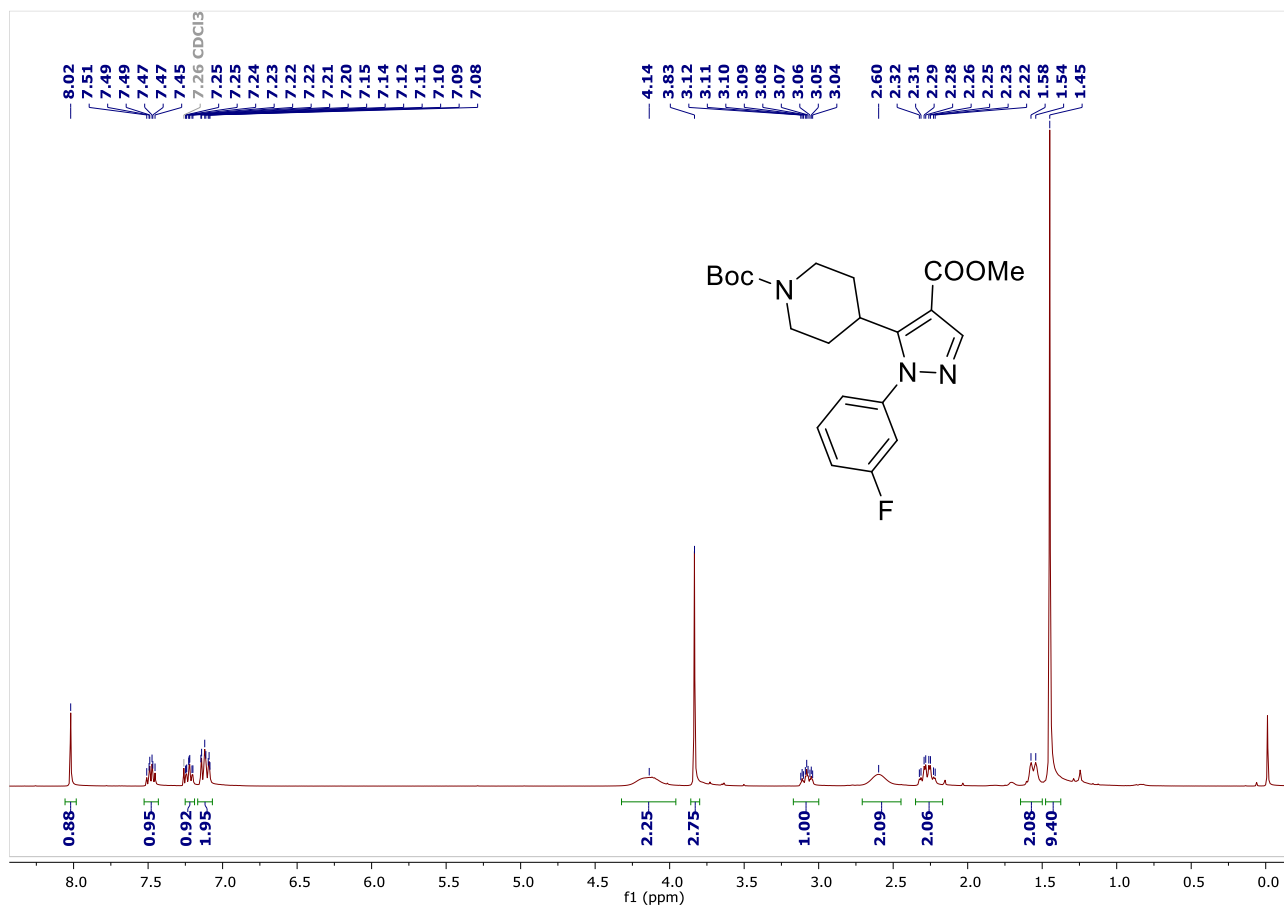

Figure S21. *tert*-Butyl 4-[1-(3-fluorophenyl)-4-(methoxycarbonyl)-1*H*-pyrazol-5-yl]piperidine-1-carboxylate (5d). <sup>1</sup>H NMR spectrum (400 MHz, CDCl<sub>3</sub>).

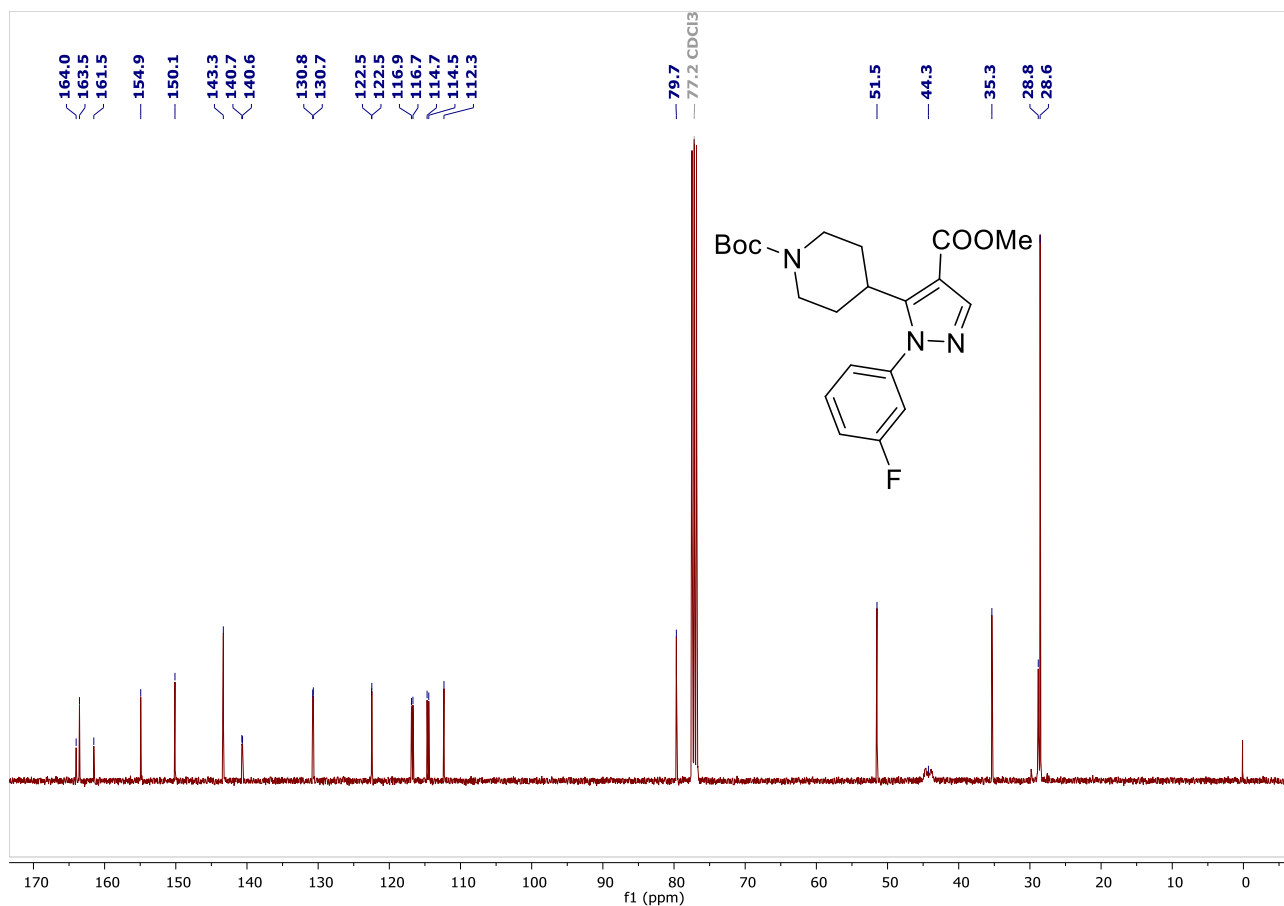

Figure S22. *tert*-Butyl 4-[1-(3-fluorophenyl)-4-(methoxycarbonyl)-1*H*-pyrazol-5-yl]piperidine-1-carboxylate (5d). <sup>13</sup>C NMR spectrum (101 MHz, CDCl<sub>3</sub>).

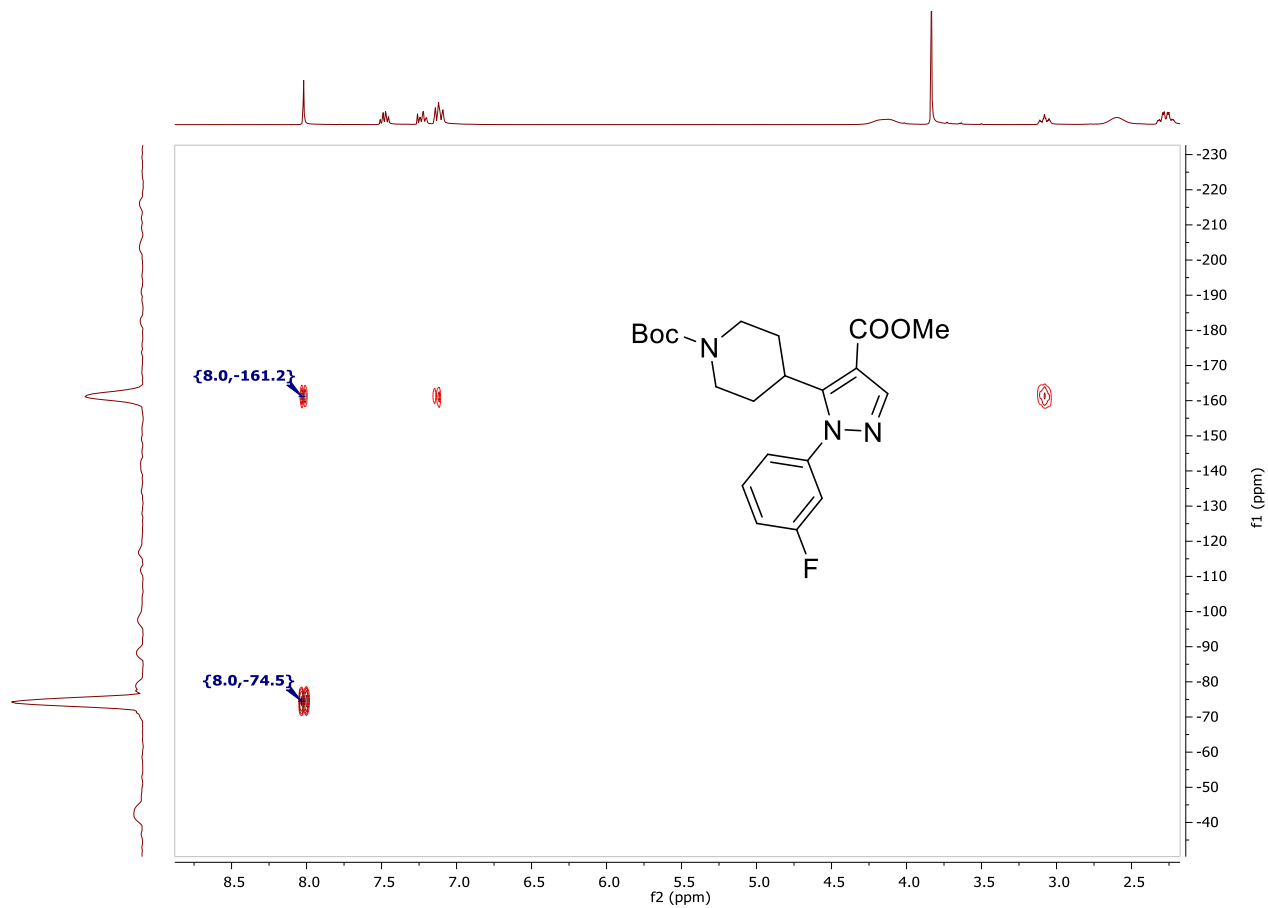

**Figure S23.** *tert*-Butyl 4-[1-(3-fluorophenyl)-4-(methoxycarbonyl)-1*H*-pyrazol-5-yl]piperidine-1-carboxylate (5d).  $^1\text{H}$ - $^{15}\text{N}$  HMBC spectrum (41 MHz,  $\text{CDCl}_3$ ).

## Compound Spectrum SmartFormula Report

### Analysis Info

Analysis Name D:\Data\GMP-014.d  
Method DirectInfusion\_TuneLow\_pos.m  
Sample Name GMP-014  
Comment SB

Acquisition Date 11/27/2018 2:20:31 PM

Operator hplc  
Instrument micrOTOF-Q III 8228888.20448

### Acquisition Parameter

|             |            |                       |           |                  |           |
|-------------|------------|-----------------------|-----------|------------------|-----------|
| Source Type | ESI        | Ion Polarity          | Positive  | Set Nebulizer    | 0.4 Bar   |
| Focus       | Not active | Set Capillary         | 4500 V    | Set Dry Heater   | 180 °C    |
| Scan Begin  | 50 m/z     | Set End Plate Offset  | -500 V    | Set Dry Gas      | 4.0 l/min |
| Scan End    | 1000 m/z   | Set Collision Cell RF | 140.0 Vpp | Set Divert Valve | Waste     |

| #    | RT [min] | Area | Int. Type       | I    | S/N  | Chromatogram | Max. m/z | FWHM [min] |
|------|----------|------|-----------------|------|------|--------------|----------|------------|
| n.a. | 0.3      | n.a. | Single spectrum | n.a. | n.a. | n.a.         | 304.2632 | n.a.       |
| n.a. | 3.3      | n.a. | Single spectrum | n.a. | n.a. | n.a.         | 426.1799 | n.a.       |

### +MS, 3.3min #200

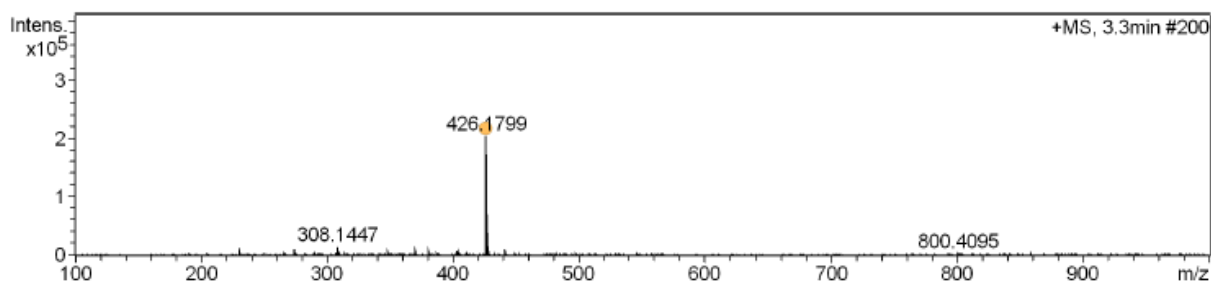

| Meas. m/z | # | Ion Formula   | m/z      | err [ppm] | mSigma | # Sigma | Score  | rdb | e <sup>-</sup> Conf | N-Rule |
|-----------|---|---------------|----------|-----------|--------|---------|--------|-----|---------------------|--------|
| 426.1799  | 1 | C21H26FN3NaO4 | 426.1800 | 0.2       | 8.8    | 1       | 100.00 | 9.5 | even                | ok     |

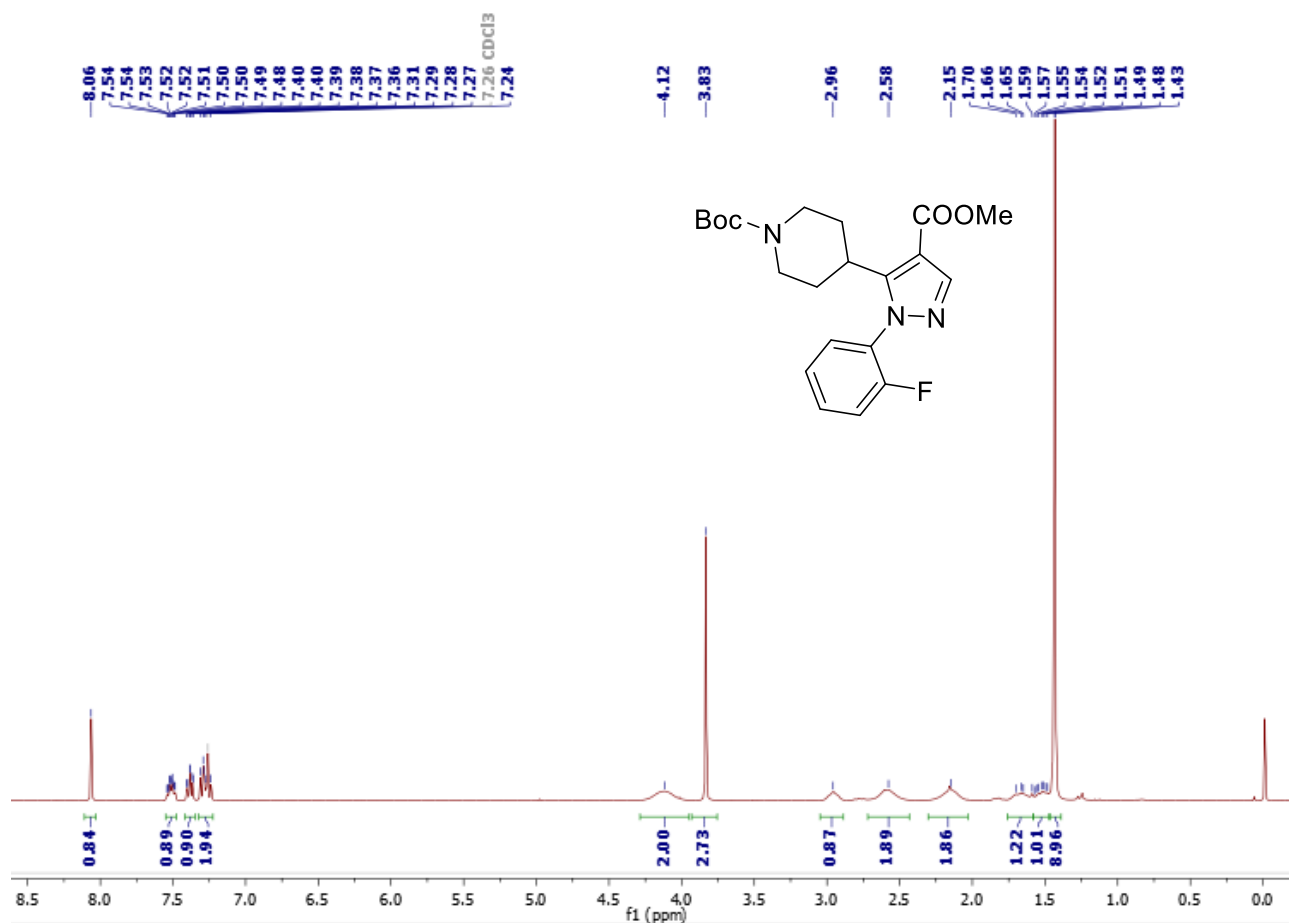

Figure S25. *tert*-Butyl 4-[1-(2-fluorophenyl)-4-(methoxycarbonyl)-1*H*-pyrazol-5-yl]piperidine-1-carboxylate (5e). <sup>1</sup>H NMR spectrum (400 MHz, CDCl<sub>3</sub>).

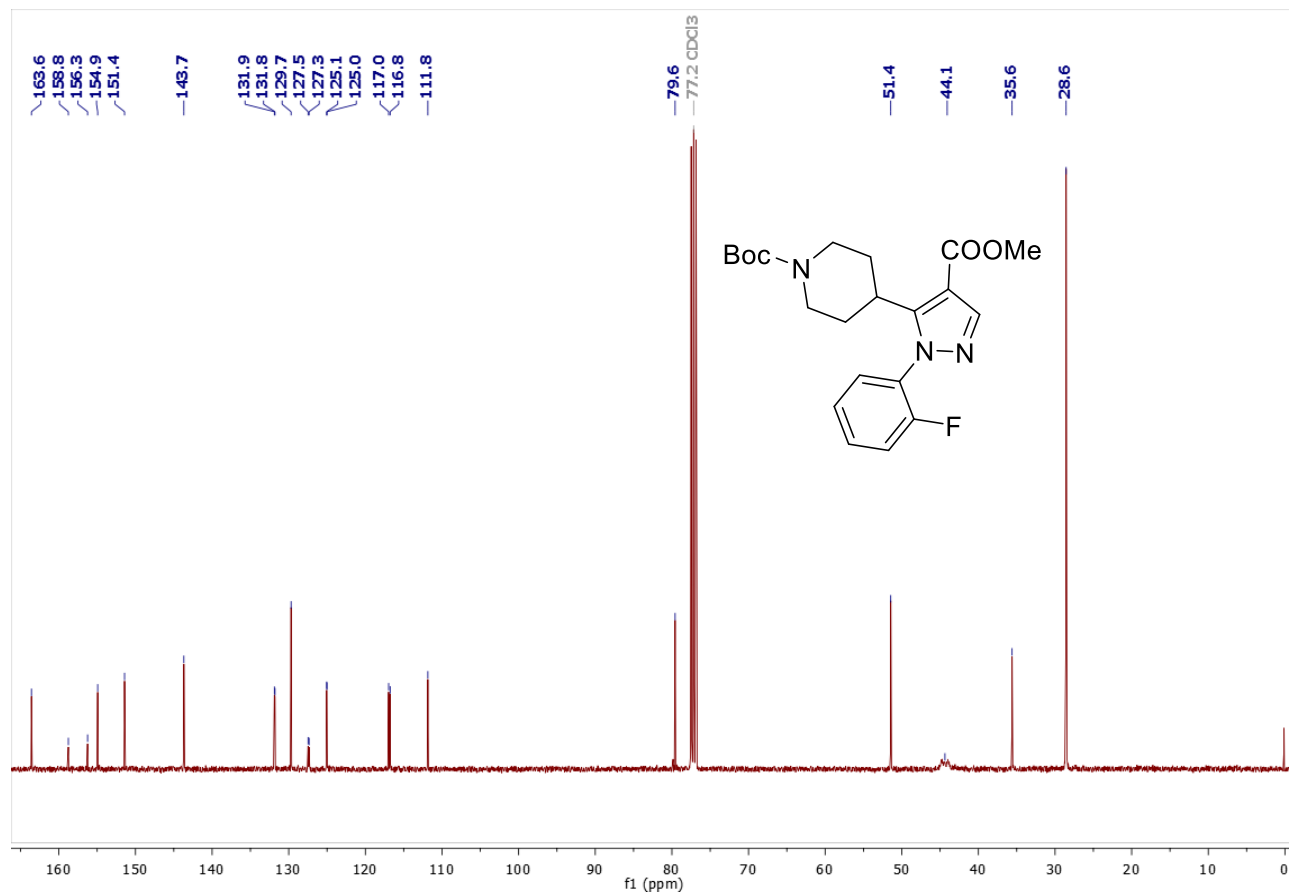

Figure S26. *tert*-Butyl 4-[1-(2-fluorophenyl)-4-(methoxycarbonyl)-1*H*-pyrazol-5-yl]piperidine-1-carboxylate (5e). <sup>13</sup>C NMR spectrum (101 MHz, CDCl<sub>3</sub>).

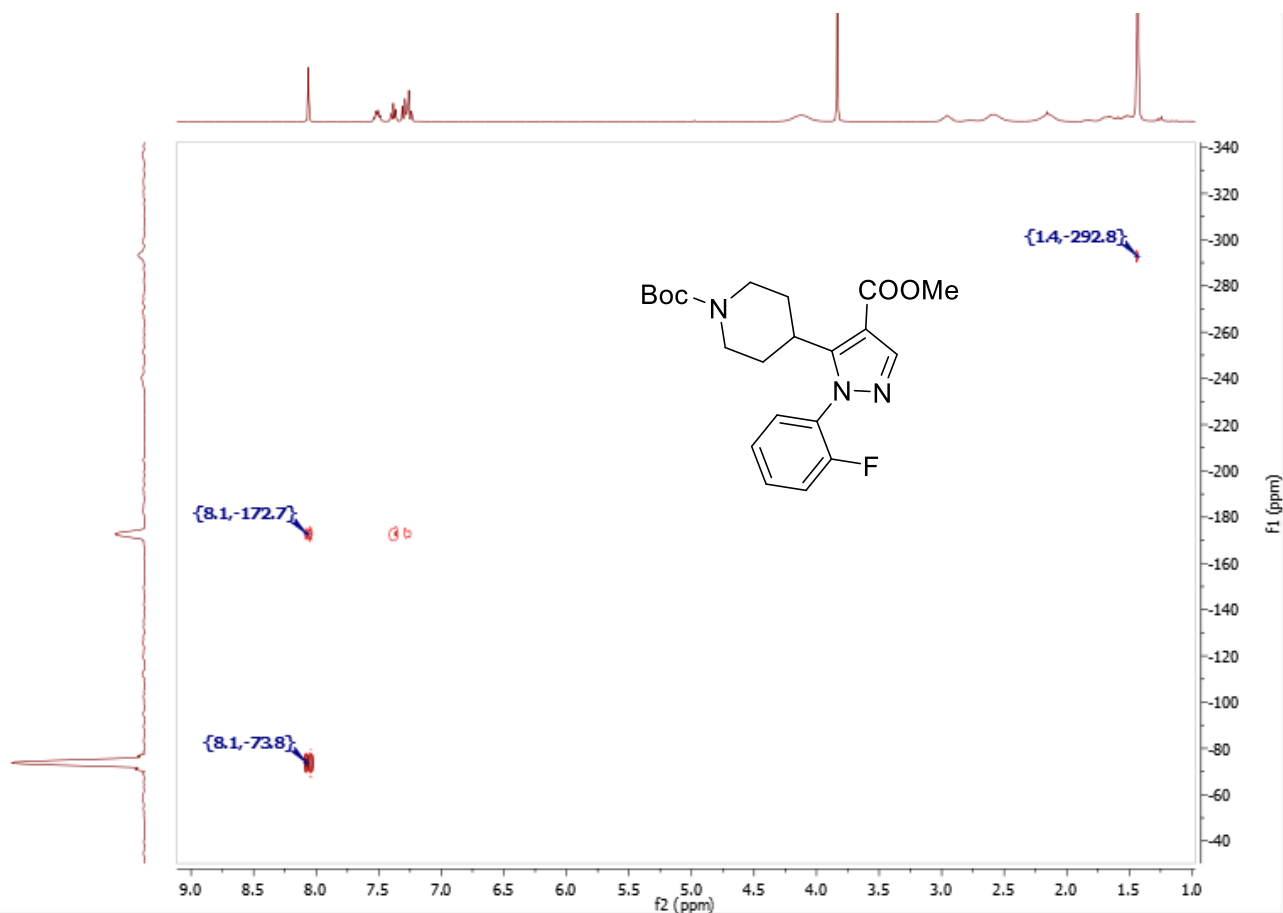

**Figure S27.** *tert*-Butyl 4-[1-(2-fluorophenyl)-4-(methoxycarbonyl)-1*H*-pyrazol-5-yl]piperidine-1-carboxylate (5e).  $^1\text{H}$ - $^{15}\text{N}$  HMBC spectrum (41 MHz,  $\text{CDCl}_3$ ).

# Compound Spectrum SmartFormula Report

## Analysis Info

Analysis Name D:\Data\GMP-013.d  
Method DirectInfusion\_TuneLow\_pos.m  
Sample Name GMP-013  
Comment SB

Acquisition Date 11/27/2018 1:33:39 PM

Operator hplc  
Instrument micrOTOF-Q III 8228888.20448

## Acquisition Parameter

|             |            |                       |           |                  |           |
|-------------|------------|-----------------------|-----------|------------------|-----------|
| Source Type | ESI        | Ion Polarity          | Positive  | Set Nebulizer    | 0.4 Bar   |
| Focus       | Not active | Set Capillary         | 4500 V    | Set Dry Heater   | 180 °C    |
| Scan Begin  | 50 m/z     | Set End Plate Offset  | -500 V    | Set Dry Gas      | 4.0 l/min |
| Scan End    | 1000 m/z   | Set Collision Cell RF | 140.0 Vpp | Set Divert Valve | Waste     |

| #    | RT [min] | Area | Int. Type       | I    | S/N  | Chromatogram | Max. m/z | FWHM [min] |
|------|----------|------|-----------------|------|------|--------------|----------|------------|
| n.a. | 0.2      | n.a. | Single spectrum | n.a. | n.a. | n.a.         | 304.2632 | n.a.       |
| n.a. | 2.4      | n.a. | Single spectrum | n.a. | n.a. | n.a.         | 426.1800 | n.a.       |

## +MS, 2.4min #145

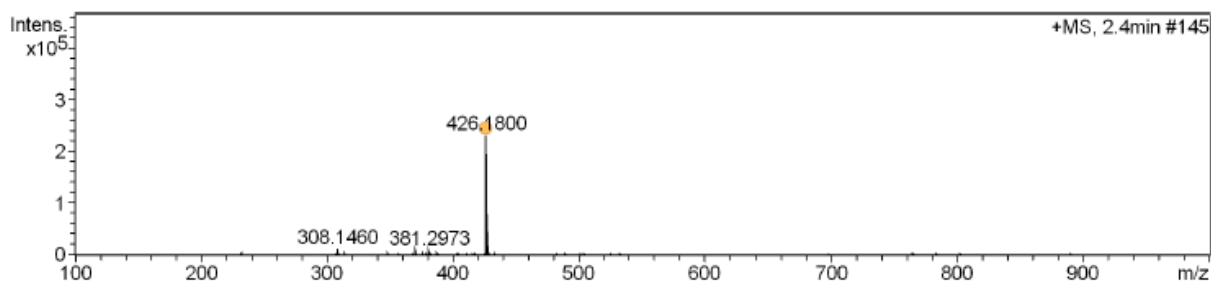

| Meas. m/z | # | Ion Formula   | m/z      | err [ppm] | mSigma | # Sigma | Score  | rdb | e <sup>-</sup> Conf | N-Rule |
|-----------|---|---------------|----------|-----------|--------|---------|--------|-----|---------------------|--------|
| 426.1800  | 1 | C21H26FN3NaO4 | 426.1800 | 0.1       | 4.3    | 1       | 100.00 | 9.5 | even                | ok     |

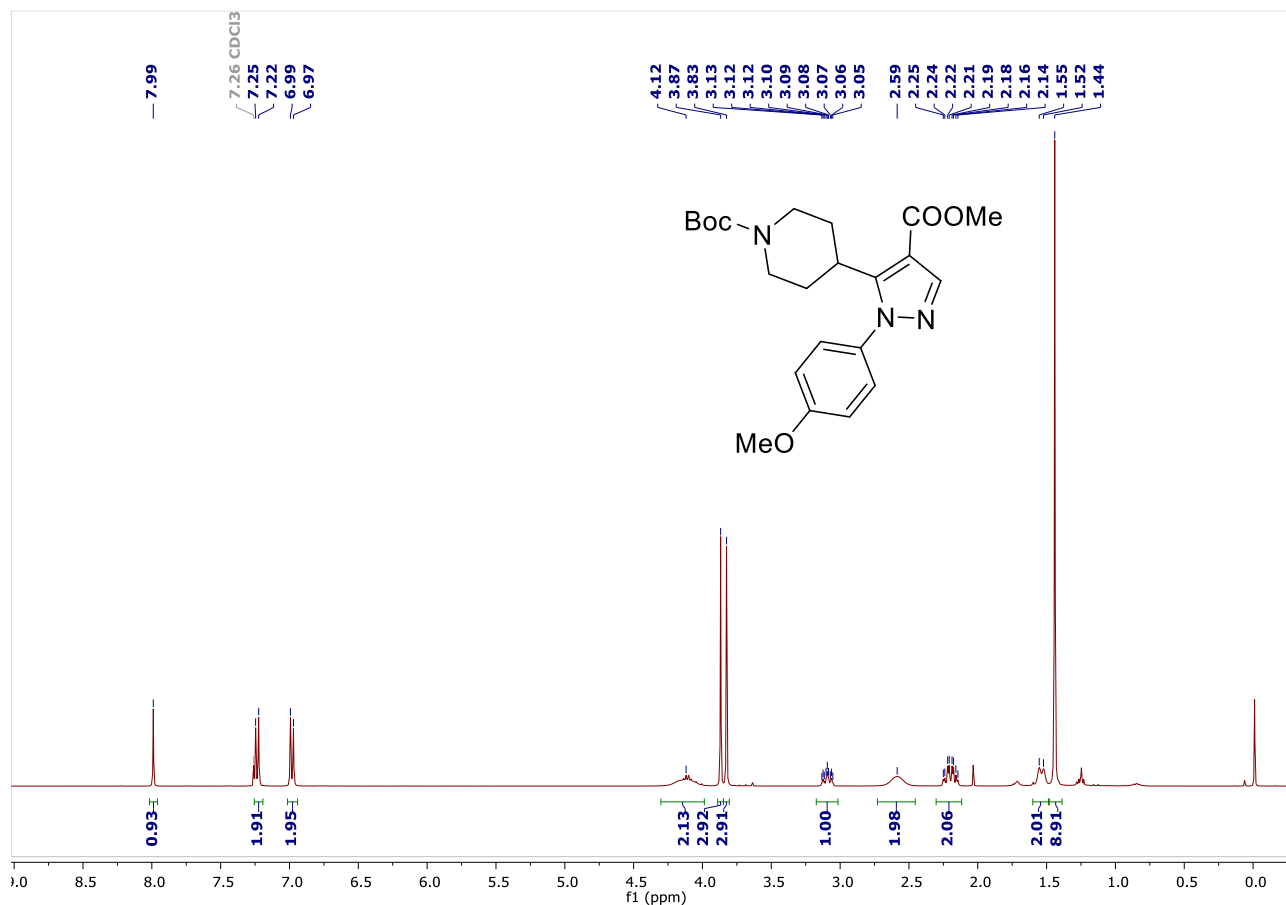

**Figure S29.** *tert*-Butyl 4-[4-(methoxycarbonyl)-1-(4-methoxyphenyl)-1*H*-pyrazol-5-yl]piperidine-1-carboxylate (5f). <sup>1</sup>H NMR spectrum (400 MHz, CDCl<sub>3</sub>).

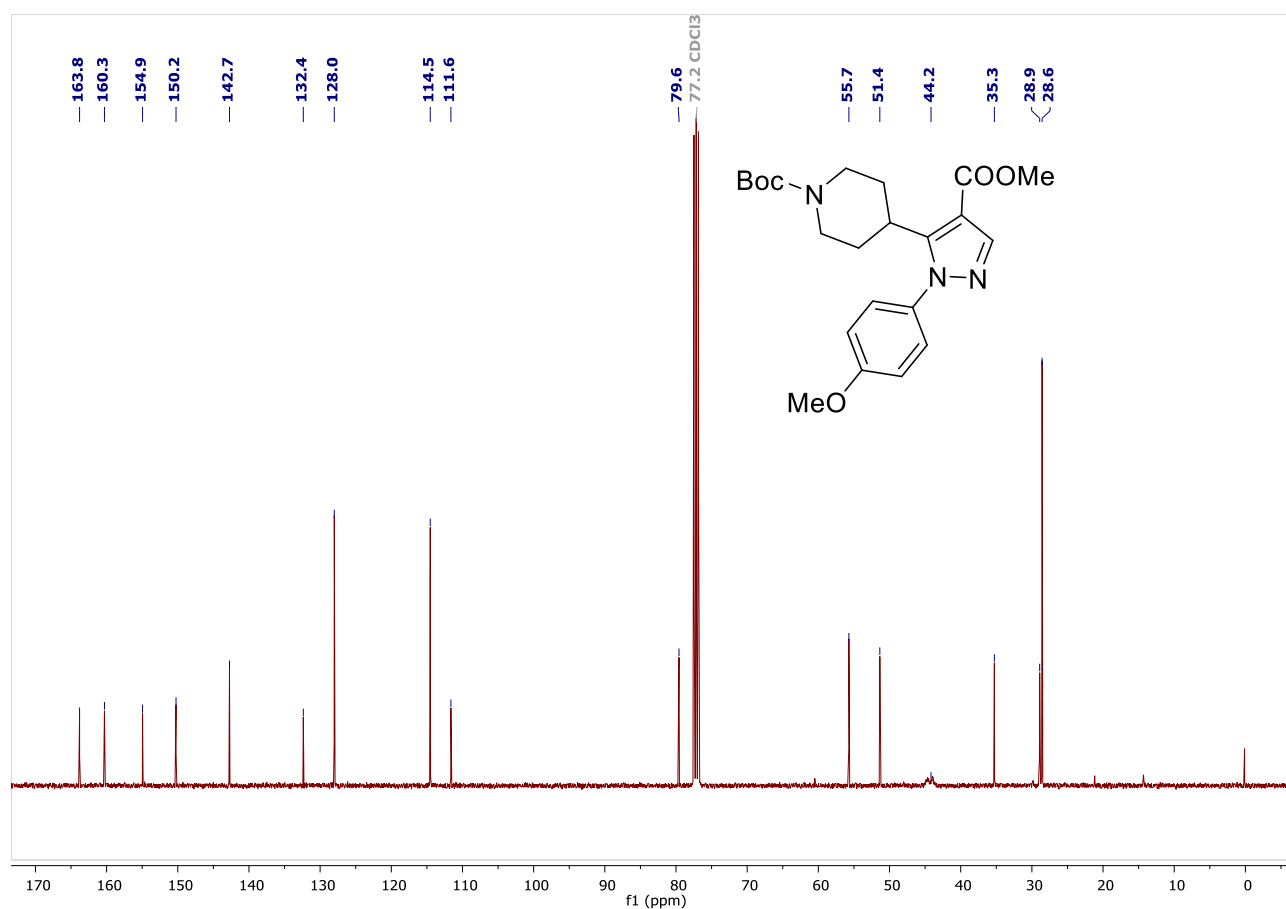

**Figure S30.** *tert*-Butyl 4-[4-(methoxycarbonyl)-1-(4-methoxyphenyl)-1*H*-pyrazol-5-yl]piperidine-1-carboxylate (5f). <sup>13</sup>C NMR spectrum (176 MHz, CDCl<sub>3</sub>).

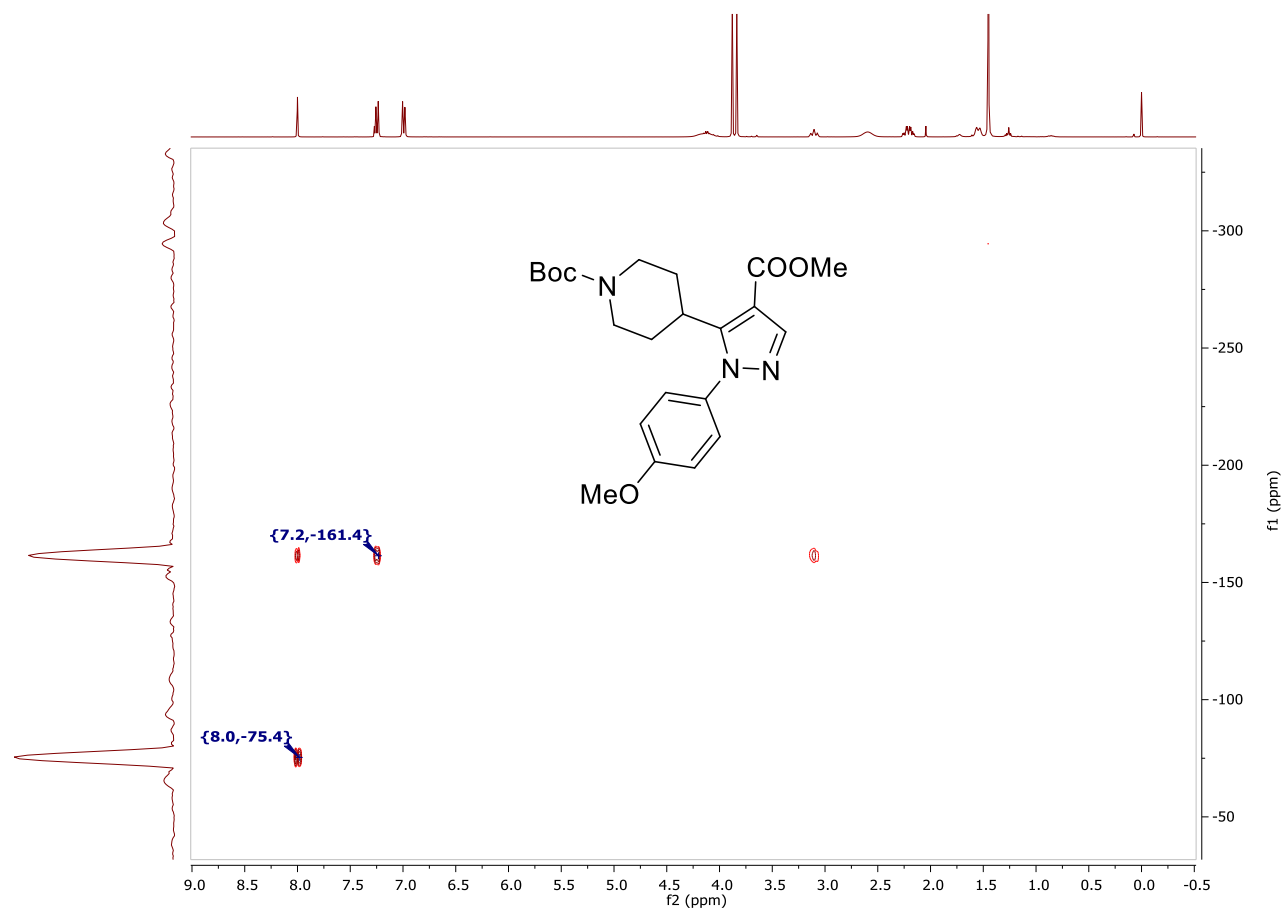

**Figure S31.** *tert*-Butyl 4-[4-(methoxycarbonyl)-1-(4-methoxyphenyl)-1*H*-pyrazol-5-yl]piperidine-1-carboxylate (5f).  $^{15}\text{N}$  NMR spectrum (41 MHz,  $\text{CDCl}_3$ ).



# Compound Spectrum SmartFormula Report

## Analysis Info

Analysis Name D:\Data\GMP-017.d  
Method DirectInfusion\_TuneLow\_pos.m  
Sample Name GMP-017  
Comment SB

Acquisition Date 11/27/2018 2:08:37 PM  
Operator hplc  
Instrument micrOTOF-Q III 8228888.20448

## Acquisition Parameter

|             |            |                       |           |                  |           |
|-------------|------------|-----------------------|-----------|------------------|-----------|
| Source Type | ESI        | Ion Polarity          | Positive  | Set Nebulizer    | 0.4 Bar   |
| Focus       | Not active | Set Capillary         | 4500 V    | Set Dry Heater   | 180 °C    |
| Scan Begin  | 50 m/z     | Set End Plate Offset  | -500 V    | Set Dry Gas      | 4.0 l/min |
| Scan End    | 1000 m/z   | Set Collision Cell RF | 140.0 Vpp | Set Divert Valve | Waste     |

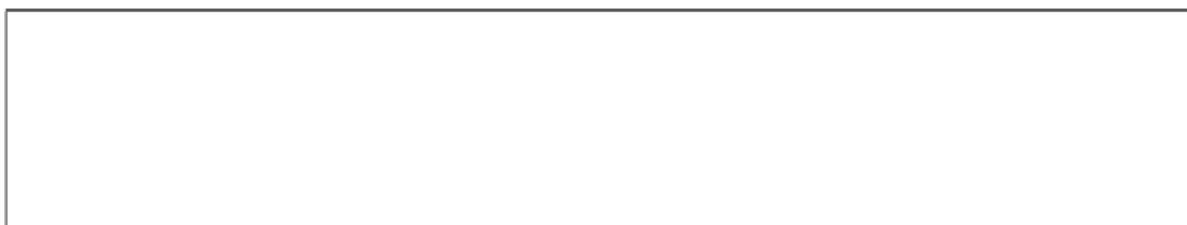

| #    | RT [min] | Area | Int. Type       | I    | S/N  | Chromatogram | Max. m/z | FWHM [min] |
|------|----------|------|-----------------|------|------|--------------|----------|------------|
| n.a. | 0.2      | n.a. | Single spectrum | n.a. | n.a. | n.a.         | 304.2631 | n.a.       |
| n.a. | 2.2      | n.a. | Single spectrum | n.a. | n.a. | n.a.         | 438.2000 | n.a.       |

## +MS, 2.2min #130

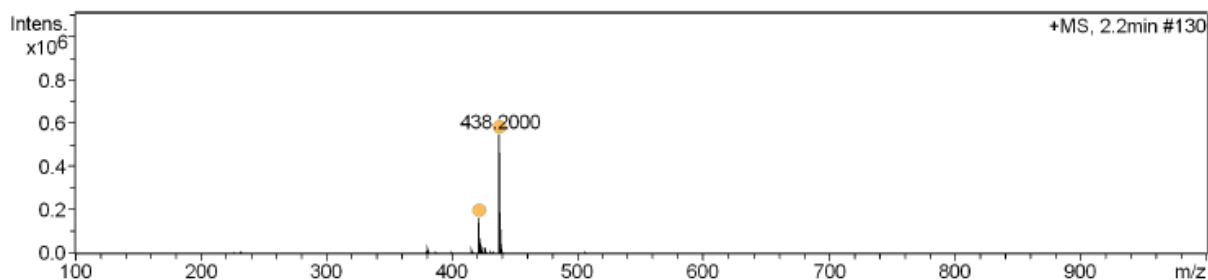

| Meas. m/z | # | Ion Formula  | m/z      | err [ppm] | mSigma | # Sigma | Score  | rdB | e <sup>-</sup> Conf | N-Rule |
|-----------|---|--------------|----------|-----------|--------|---------|--------|-----|---------------------|--------|
| 422.2046  | 1 | C22H29N3NaO4 | 422.2050 | 1.0       | 4.5    | 1       | 100.00 | 9.5 | even                | ok     |
| 438.2000  | 1 | C22H29N3NaO5 | 438.1999 | 0.0       | 4.4    | 1       | 100.00 | 9.5 | even                | ok     |

**Figure S32. *tert*-Butyl 4-[4-(methoxycarbonyl)-1-(4-methoxyphenyl)-1*H*-pyrazol-5-yl]piperidine-1-carboxylate (5f). HRMS (ESI-TOF).**

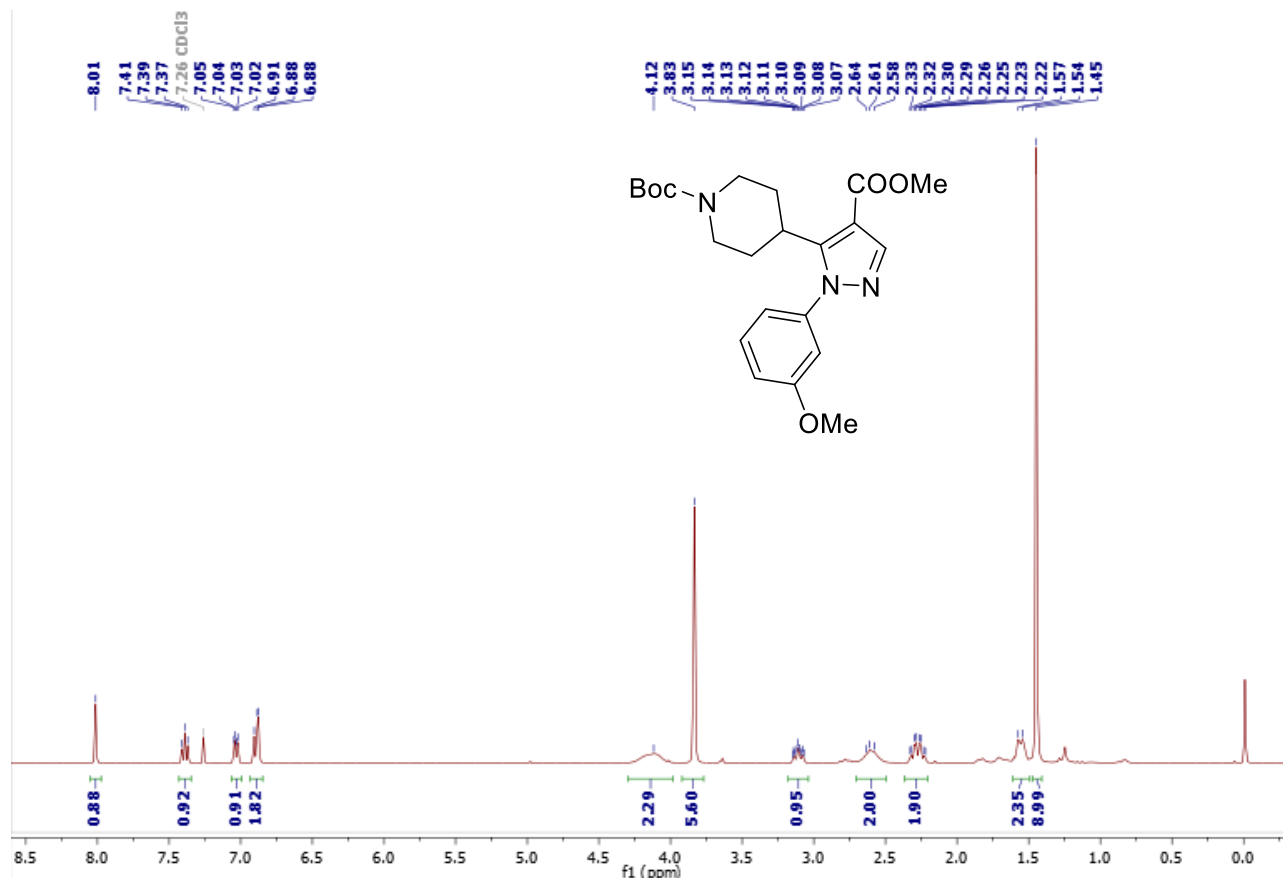

Figure S33. *tert*-Butyl 4-[4-(methoxycarbonyl)-1-(3-methoxyphenyl)-1*H*-pyrazol-5-yl]piperidine-1-carboxylate (5g). <sup>1</sup>H NMR spectrum (400 MHz, CDCl<sub>3</sub>).

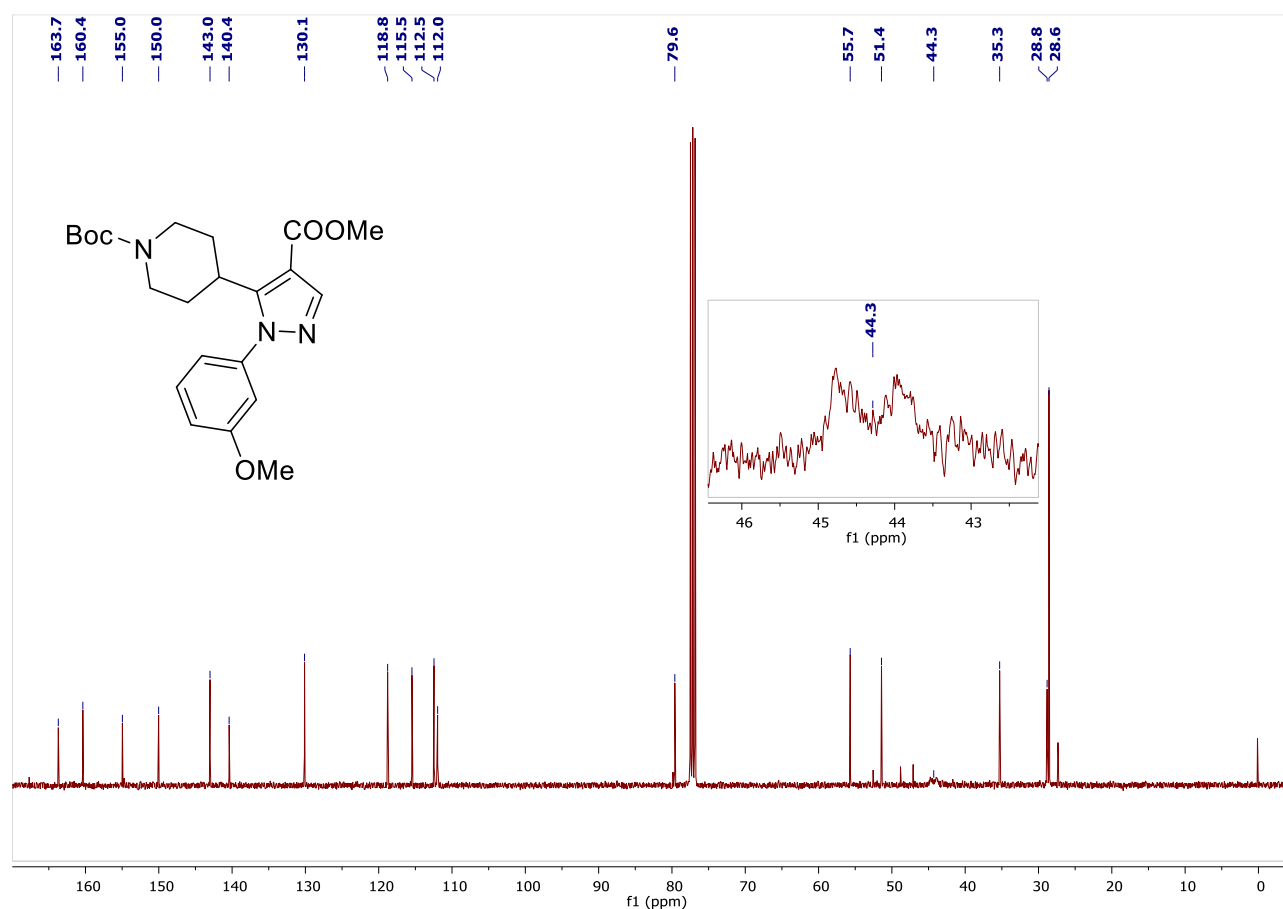

Figure S34. *tert*-Butyl 4-[4-(methoxycarbonyl)-1-(3-methoxyphenyl)-1*H*-pyrazol-5-yl]piperidine-1-carboxylate (5g). <sup>13</sup>C NMR spectrum (101 MHz, CDCl<sub>3</sub>).

# Compound Spectrum SmartFormula Report

## Analysis Info

Analysis Name D:\Data\GMP-16.d  
Method DirectInfusion\_TuneLow\_pos.m  
Sample Name GMP-16  
Comment AB

Acquisition Date 2/4/2021 11:39:59 PM

Operator hplc  
Instrument micrOTOF-Q III 8228888.20448

## Acquisition Parameter

|             |            |                       |           |                  |           |
|-------------|------------|-----------------------|-----------|------------------|-----------|
| Source Type | ESI        | Ion Polarity          | Positive  | Set Nebulizer    | 0.4 Bar   |
| Focus       | Not active | Set Capillary         | 4500 V    | Set Dry Heater   | 180 °C    |
| Scan Begin  | 50 m/z     | Set End Plate Offset  | -500 V    | Set Dry Gas      | 4.0 l/min |
| Scan End    | 1000 m/z   | Set Collision Cell RF | 140.0 Vpp | Set Divert Valve | Waste     |

| #    | RT [min] | Area | Int. Type       | I    | S/N  | Chromatogram | Max. m/z | FWHM [min] |
|------|----------|------|-----------------|------|------|--------------|----------|------------|
| n.a. | 2.8      | n.a. | Single spectrum | n.a. | n.a. | n.a.         | 438.2000 | n.a.       |

## +MS, 2.8min #165

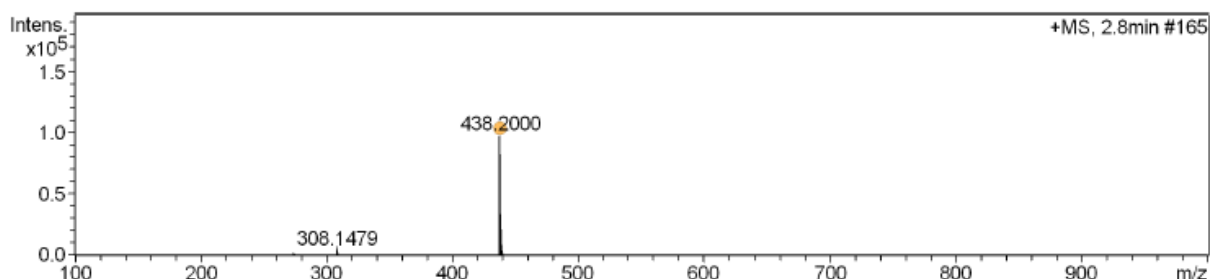

| Meas. m/z | # | Ion Formula  | m/z      | err [ppm] | mSigma | # Sigma | Score  | rdb | e <sup>-</sup> Conf | N-Rule |
|-----------|---|--------------|----------|-----------|--------|---------|--------|-----|---------------------|--------|
| 438.2000  | 1 | C22H29N3NaO5 | 438.1999 | -0.0      | 2.3    | 1       | 100.00 | 9.5 | even                | ok     |

**Figure S35.** *tert*-Butyl 4-[4-(methoxycarbonyl)-1-(3-methoxyphenyl)-1*H*-pyrazol-5-yl]piperidine-1-carboxylate (5g). HRMS (ESI-TOF).

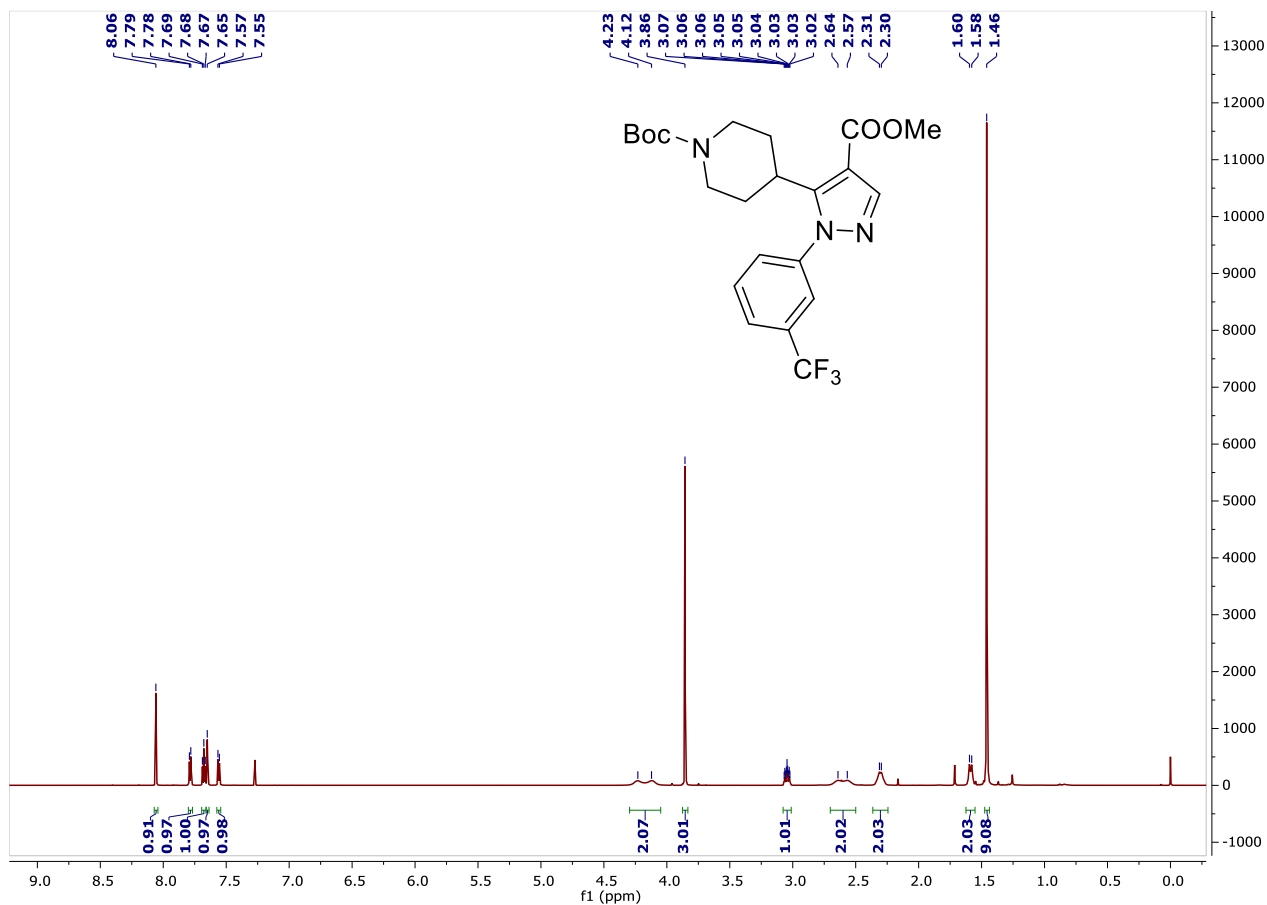

Figure S36. *tert*-Butyl 4-{4-(methoxycarbonyl)-1-[3-(trifluoromethyl)phenyl]-1*H*-pyrazol-5-yl}piperidine-1-carboxylate (5h). <sup>1</sup>H NMR spectrum (700 MHz, CDCl<sub>3</sub>).

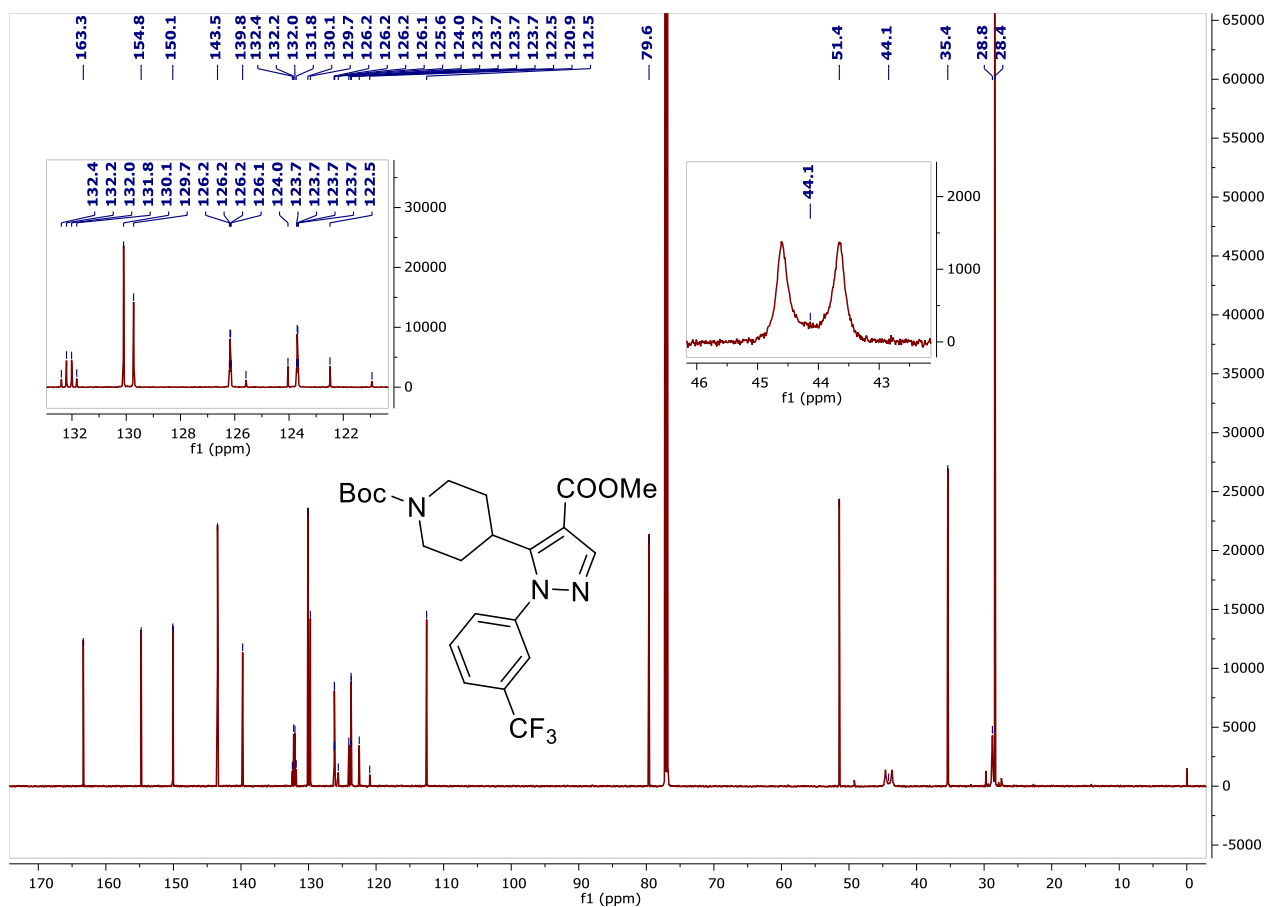

Figure S37. *tert*-Butyl 4-{4-(methoxycarbonyl)-1-[3-(trifluoromethyl)phenyl]-1*H*-pyrazol-5-yl}piperidine-1-carboxylate (5h). <sup>13</sup>C NMR spectrum (176 MHz, CDCl<sub>3</sub>).

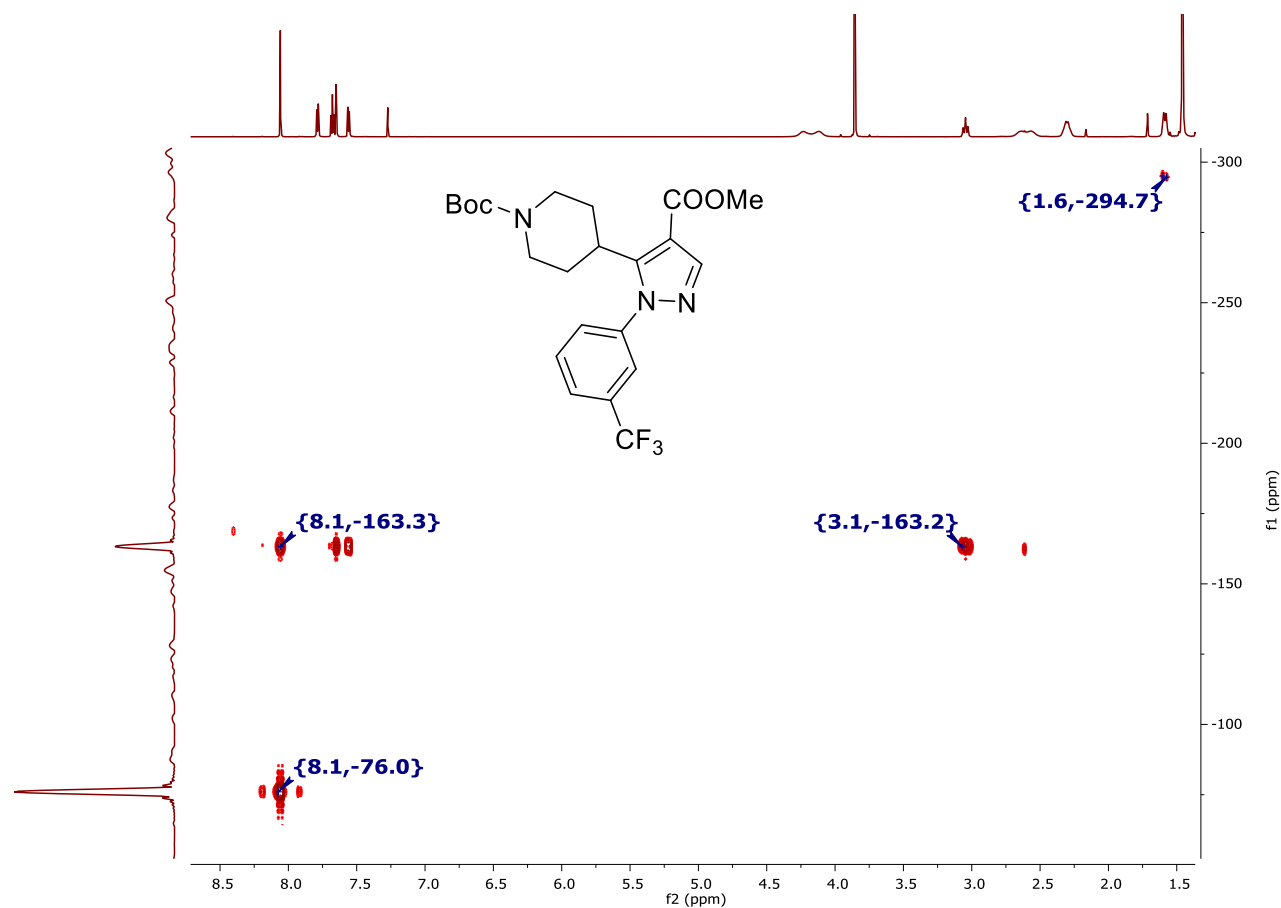

**Figure S38.** *tert*-Butyl 4-{4-(methoxycarbonyl)-1-[3-(trifluoromethyl)phenyl]-1*H*-pyrazol-5-yl}piperidine-1-carboxylate (5h). <sup>1</sup>H-<sup>15</sup>N HMBC spectrum (71 MHz, CDCl<sub>3</sub>).

# Compound Spectrum SmartFormula Report

## Analysis Info

Analysis Name D:\Data\GMP-035.d  
Method DirectInfusion\_TuneLow\_pos.m  
Sample Name GMP-035  
Comment SB

Acquisition Date 11/29/2018 11:19:05 AM

Operator hplc  
Instrument micrOTOF-Q III 8228888.20448

## Acquisition Parameter

|             |            |                       |           |                  |           |
|-------------|------------|-----------------------|-----------|------------------|-----------|
| Source Type | ESI        | Ion Polarity          | Positive  | Set Nebulizer    | 0.4 Bar   |
| Focus       | Not active | Set Capillary         | 4500 V    | Set Dry Heater   | 180 °C    |
| Scan Begin  | 50 m/z     | Set End Plate Offset  | -500 V    | Set Dry Gas      | 4.0 l/min |
| Scan End    | 1000 m/z   | Set Collision Cell RF | 140.0 Vpp | Set Divert Valve | Waste     |

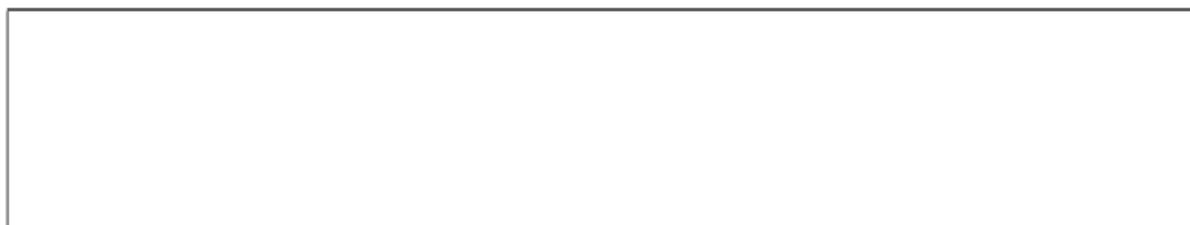

| #    | RT [min] | Area | Int. Type       | I    | S/N  | Chromatogram | Max. m/z | FWHM [min] |
|------|----------|------|-----------------|------|------|--------------|----------|------------|
| n.a. | 0.5      | n.a. | Single spectrum | n.a. | n.a. | n.a.         | 226.9518 | n.a.       |
| n.a. | 3.5      | n.a. | Single spectrum | n.a. | n.a. | n.a.         | 476.1768 | n.a.       |

## +MS, 3.5min #212

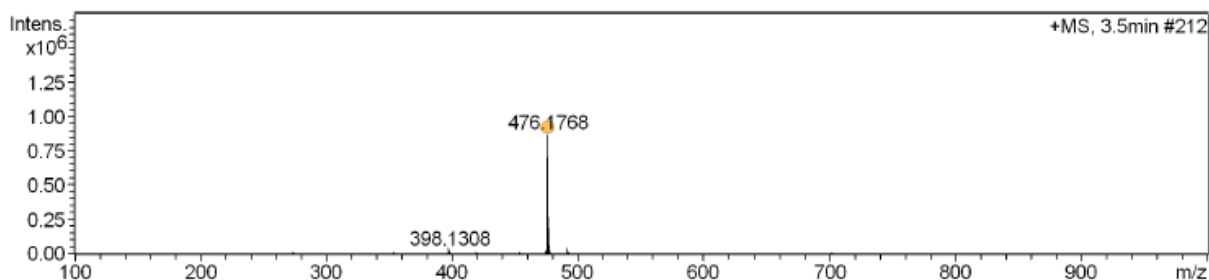

| Meas. m/z | # | Ion Formula    | m/z      | err [ppm] | mSigma | # Sigma | Score  | rdb | e <sup>-</sup> Conf | N-Rule |
|-----------|---|----------------|----------|-----------|--------|---------|--------|-----|---------------------|--------|
| 476.1768  | 1 | C22H26F3N3NaO4 | 476.1768 | -0.1      | 7.6    | 1       | 100.00 | 9.5 | even                | ok     |

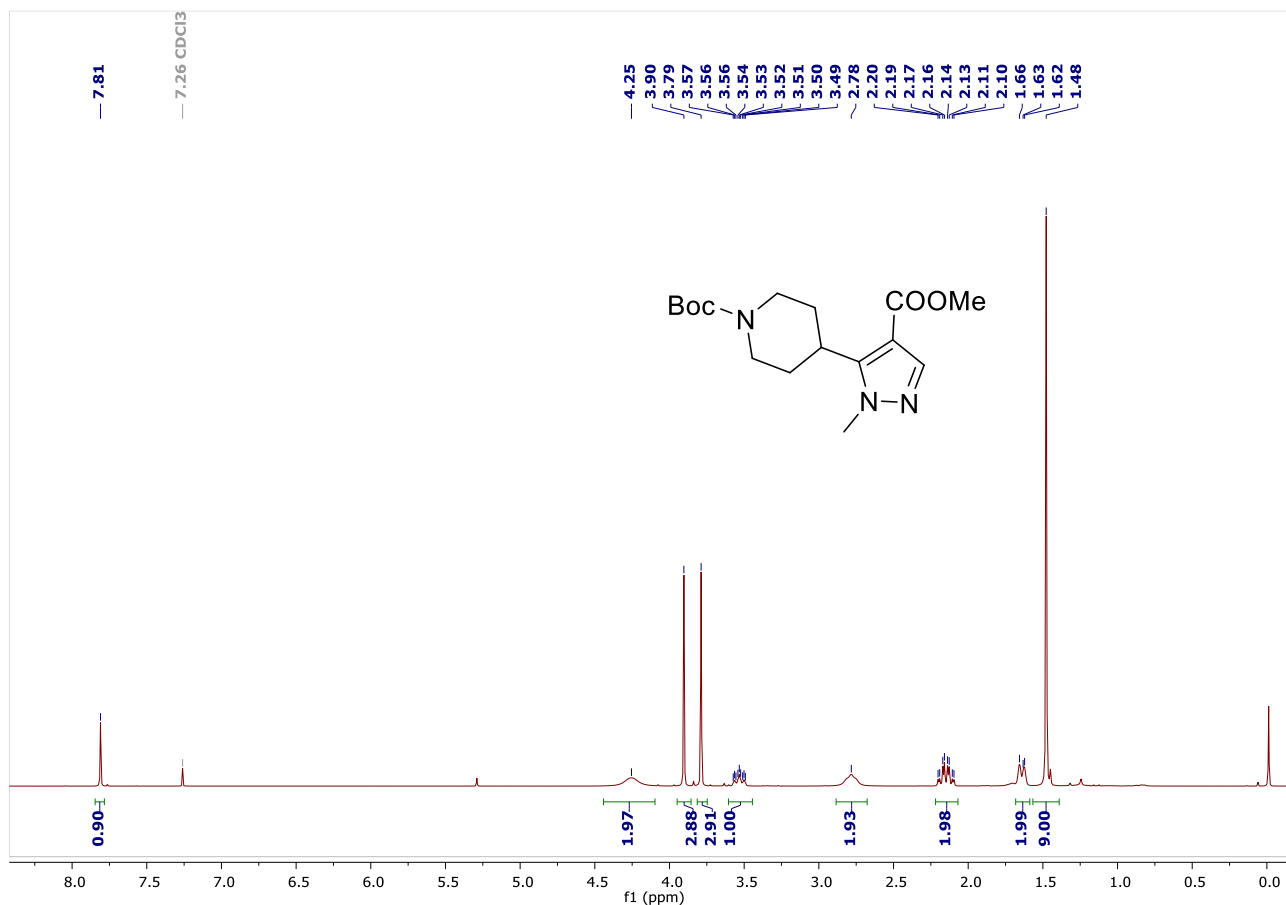

Figure S40. *tert*-Butyl 4-[4-(methoxycarbonyl)-1-methyl-1*H*-pyrazol-5-yl]piperidine-1-carboxylate (**5i**). <sup>1</sup>H NMR spectrum (400 MHz, CDCl<sub>3</sub>).

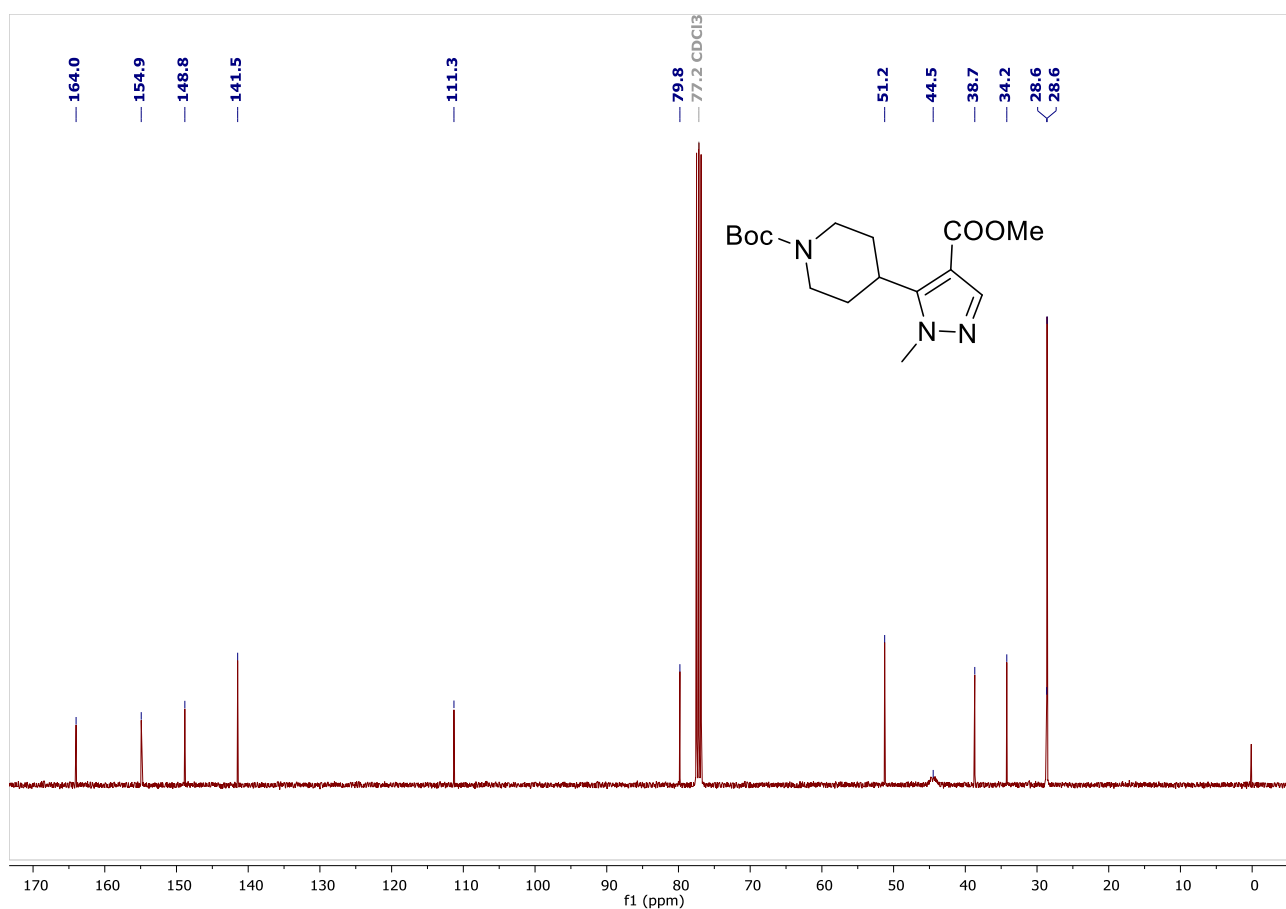

Figure S41. *tert*-Butyl 4-[4-(methoxycarbonyl)-1-methyl-1*H*-pyrazol-5-yl]piperidine-1-carboxylate (**5i**). <sup>13</sup>C NMR spectrum (101 MHz, CDCl<sub>3</sub>).

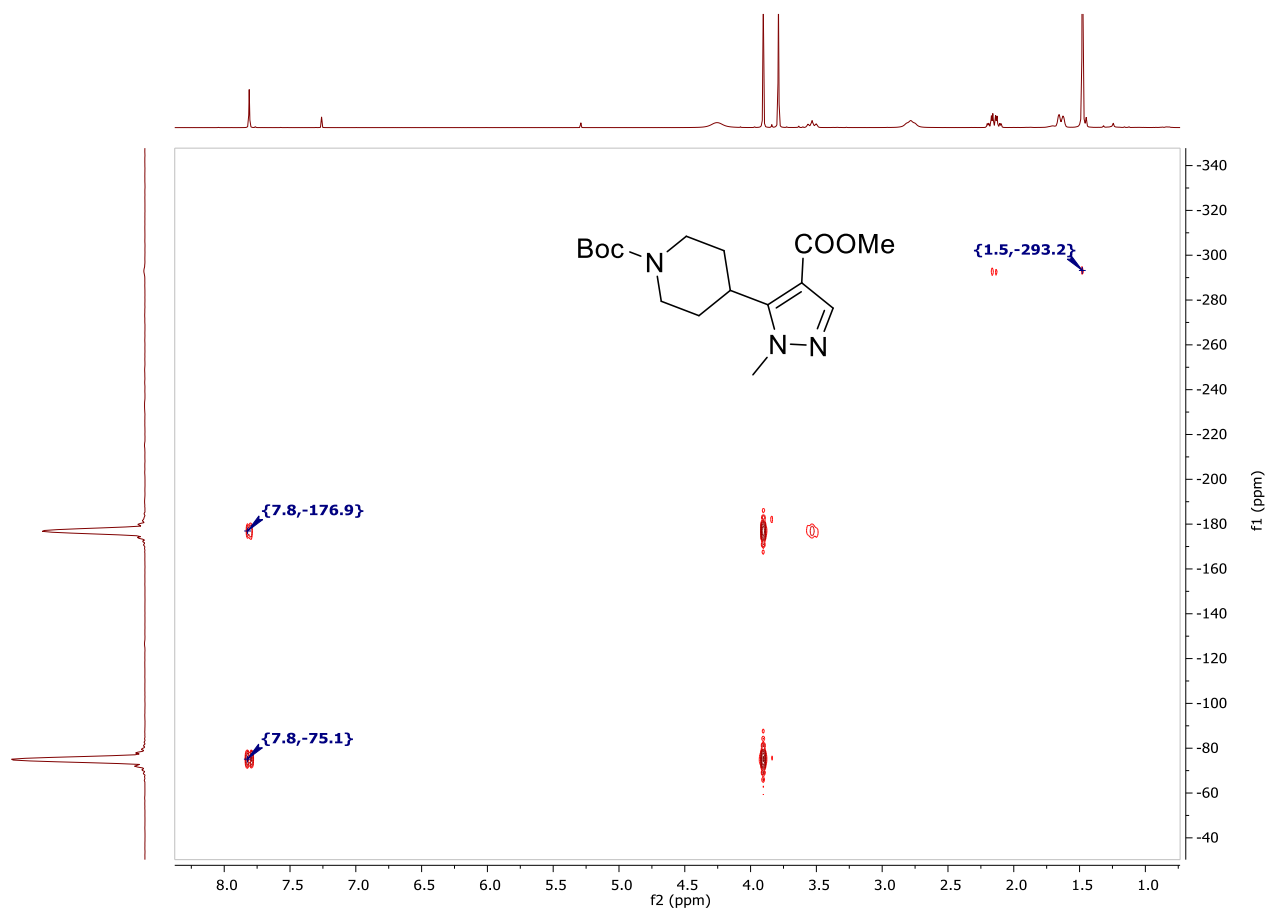

**Figure S42.** *tert*-Butyl 4-[4-(methoxycarbonyl)-1-methyl-1*H*-pyrazol-5-yl]piperidine-1-carboxylate (5i).  $^1\text{H}$ - $^{15}\text{N}$  HMBC spectrum (41 MHz,  $\text{CDCl}_3$ ).



# Compound Spectrum SmartFormula Report

## Analysis Info

Analysis Name D:\Data\GMP-012.d  
Method DirectInfusion\_TuneLow\_pos.m  
Sample Name GMP-012  
Comment SB

Acquisition Date 11/27/2018 11:31:36 AM

Operator hplc  
Instrument micrOTOF-Q III 8228888.20448

## Acquisition Parameter

|             |            |                       |           |                  |           |
|-------------|------------|-----------------------|-----------|------------------|-----------|
| Source Type | ESI        | Ion Polarity          | Positive  | Set Nebulizer    | 0.4 Bar   |
| Focus       | Not active | Set Capillary         | 4500 V    | Set Dry Heater   | 180 °C    |
| Scan Begin  | 50 m/z     | Set End Plate Offset  | -500 V    | Set Dry Gas      | 4.0 l/min |
| Scan End    | 1000 m/z   | Set Collision Cell RF | 140.0 Vpp | Set Divert Valve | Waste     |

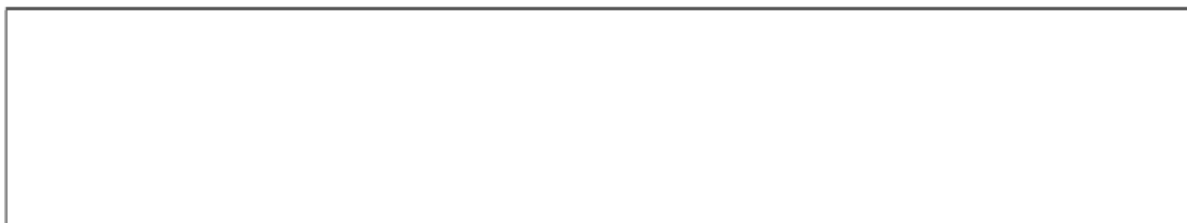

| #    | RT [min] | Area | Int. Type       | I    | S/N  | Chromatogram | Max. m/z | FWHM [min] |
|------|----------|------|-----------------|------|------|--------------|----------|------------|
| n.a. | 0.2      | n.a. | Single spectrum | n.a. | n.a. | n.a.         | 304.2632 | n.a.       |
| n.a. | 4.5      | n.a. | Single spectrum | n.a. | n.a. | n.a.         | 346.1737 | n.a.       |

## +MS, 4.5min #271

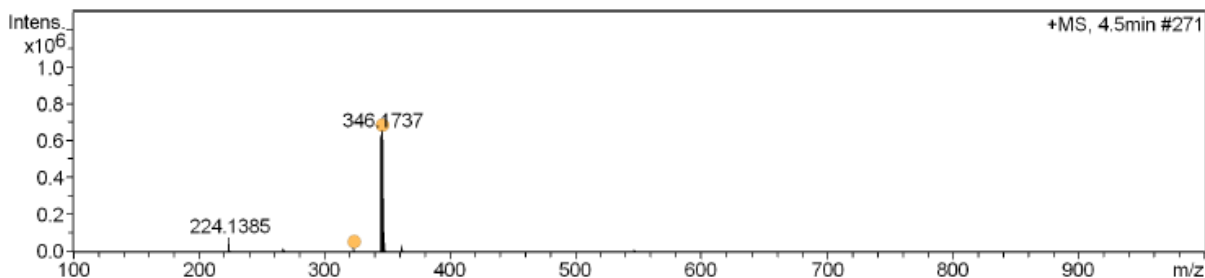

| Meas. m/z | # | Ion Formula  | m/z      | err [ppm] | mSigma | # Sigma | Score  | rdB | e <sup>-</sup> Conf | N-Rule |
|-----------|---|--------------|----------|-----------|--------|---------|--------|-----|---------------------|--------|
| 324.1906  | 1 | C16H26N3O4   | 324.1918 | -3.5      | 21.5   | 1       | 100.00 | 5.5 | even                | ok     |
| 346.1737  | 1 | C16H25N3NaO4 | 346.1737 | 0.1       | 2.4    | 1       | 100.00 | 5.5 | even                | ok     |

**Figure S43.** *tert*-Butyl 4-[4-(methoxycarbonyl)-1-methyl-1*H*-pyrazol-5-yl]piperidine-1-carboxylate (**5i**). HRMS (ESI-TOF).

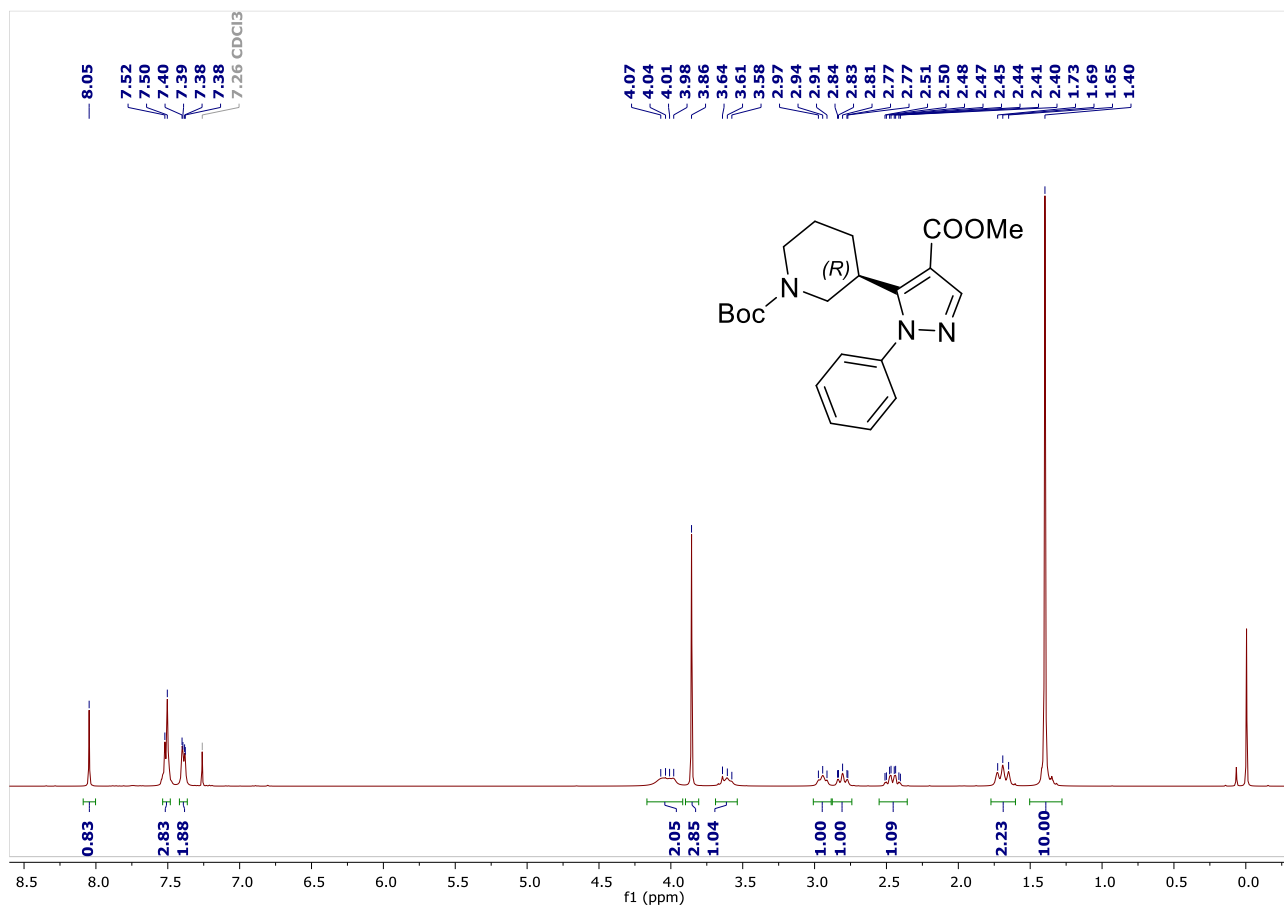

Figure S44. *tert*-Butyl (3*R*)-3-[4-(methoxycarbonyl)-1-phenyl-1*H*-pyrazol-5-yl]piperidine-1-carboxylate (5j). <sup>1</sup>H NMR spectrum (400 MHz, CDCl<sub>3</sub>).

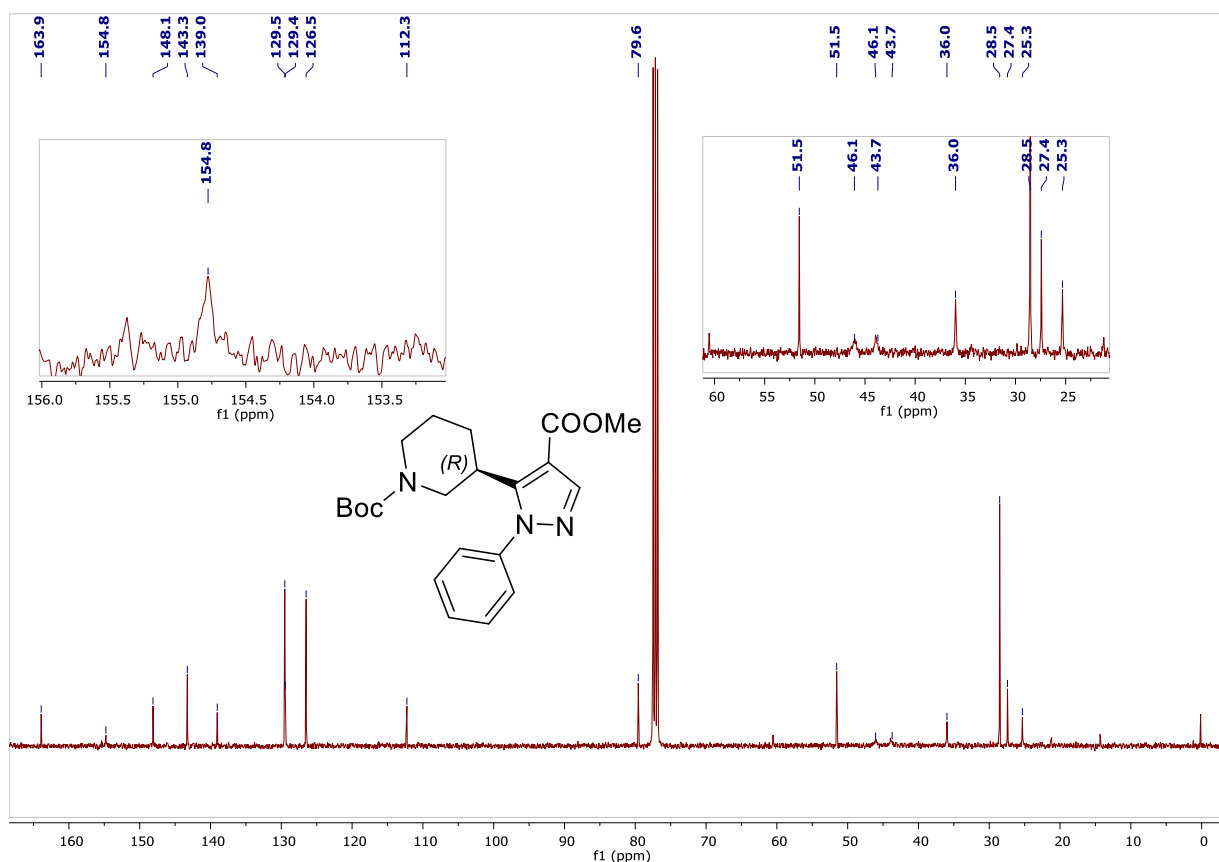

Figure S45. *tert*-Butyl (3*R*)-3-[4-(methoxycarbonyl)-1-phenyl-1*H*-pyrazol-5-yl]piperidine-1-carboxylate (5j). <sup>13</sup>C NMR spectrum (101 MHz, CDCl<sub>3</sub>).

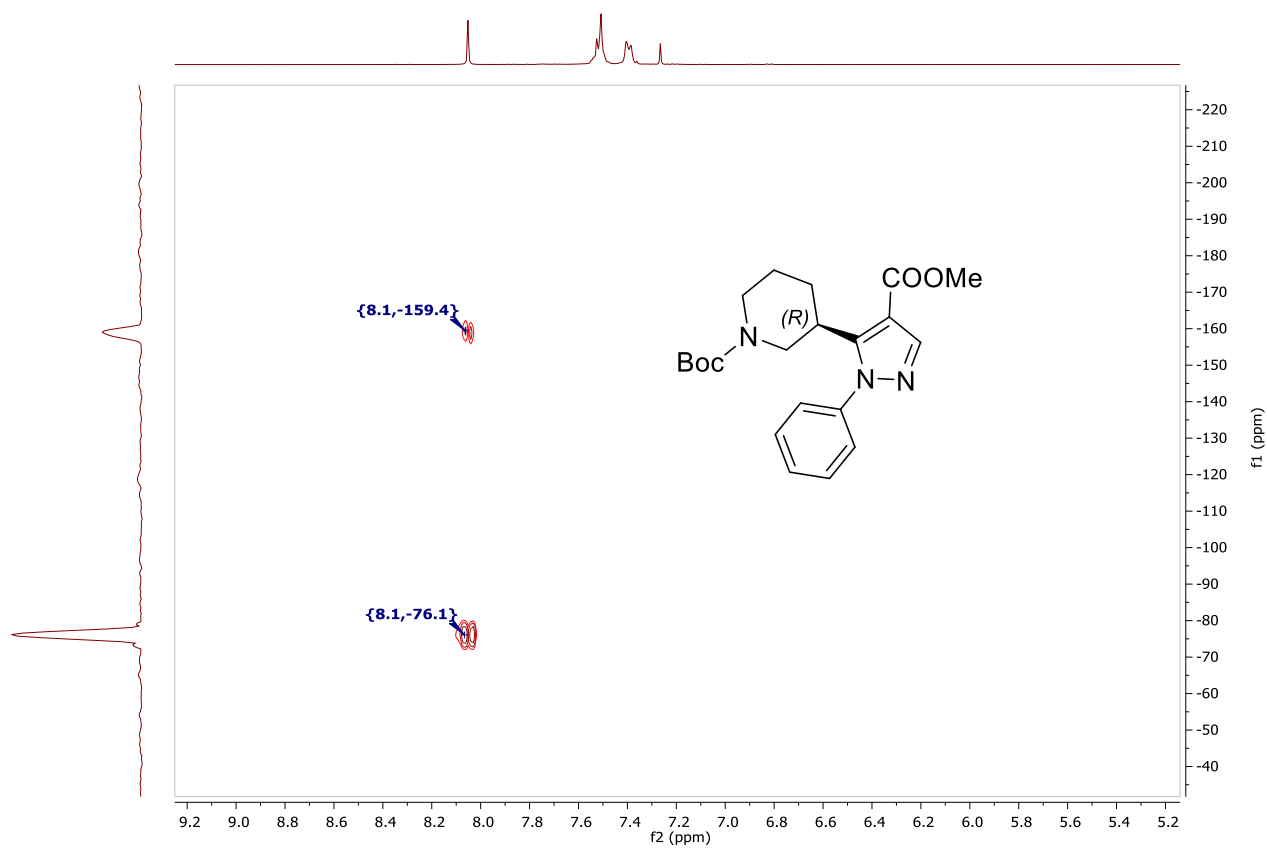

**Figure S46.** *tert*-Butyl (3*R*)-3-[4-(methoxycarbonyl)-1-phenyl-1*H*-pyrazol-5-yl]piperidine-1-carboxylate (5j).  $^1\text{H}$ - $^{15}\text{N}$  HMBC spectrum (41 MHz,  $\text{CDCl}_3$ ).

## Compound Spectrum SmartFormula Report

### Analysis Info

Analysis Name D:\Data\GMP-117.d  
Method DirectInfusion\_TuneLow\_pos.m  
Sample Name GMP-117  
Comment AB

Acquisition Date 2/5/2021 12:32:27 AM

Operator hplc  
Instrument micrOTOF-Q III 8228888.20448

### Acquisition Parameter

|             |            |                       |           |                  |           |
|-------------|------------|-----------------------|-----------|------------------|-----------|
| Source Type | ESI        | Ion Polarity          | Positive  | Set Nebulizer    | 0.4 Bar   |
| Focus       | Not active | Set Capillary         | 4500 V    | Set Dry Heater   | 180 °C    |
| Scan Begin  | 50 m/z     | Set End Plate Offset  | -500 V    | Set Dry Gas      | 4.0 l/min |
| Scan End    | 1000 m/z   | Set Collision Cell RF | 140.0 Vpp | Set Divert Valve | Waste     |

| #    | RT [min] | Area | Int. Type       | I    | S/N  | Chromatogram | Max. m/z | FWHM [min] |
|------|----------|------|-----------------|------|------|--------------|----------|------------|
| n.a. | 4.3      | n.a. | Single spectrum | n.a. | n.a. | n.a.         | 408.1893 | n.a.       |

### +MS, 4.3min #255

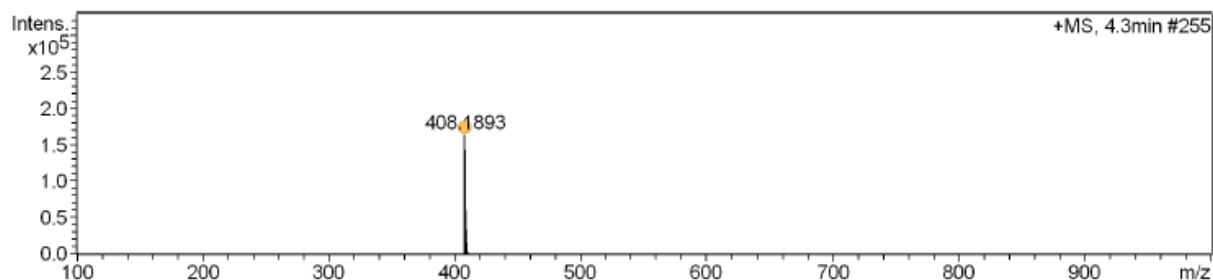

| Meas. m/z | # | Ion Formula                                                     | m/z      | err [ppm] | mSigma | # Sigma | Score  | rdB | e <sup>-</sup> Conf | N-Rule |
|-----------|---|-----------------------------------------------------------------|----------|-----------|--------|---------|--------|-----|---------------------|--------|
| 408.1893  | 1 | C <sub>21</sub> H <sub>27</sub> N <sub>3</sub> NaO <sub>4</sub> | 408.1894 | -0.1      | 2.9    | 1       | 100.00 | 9.5 | even                | ok     |

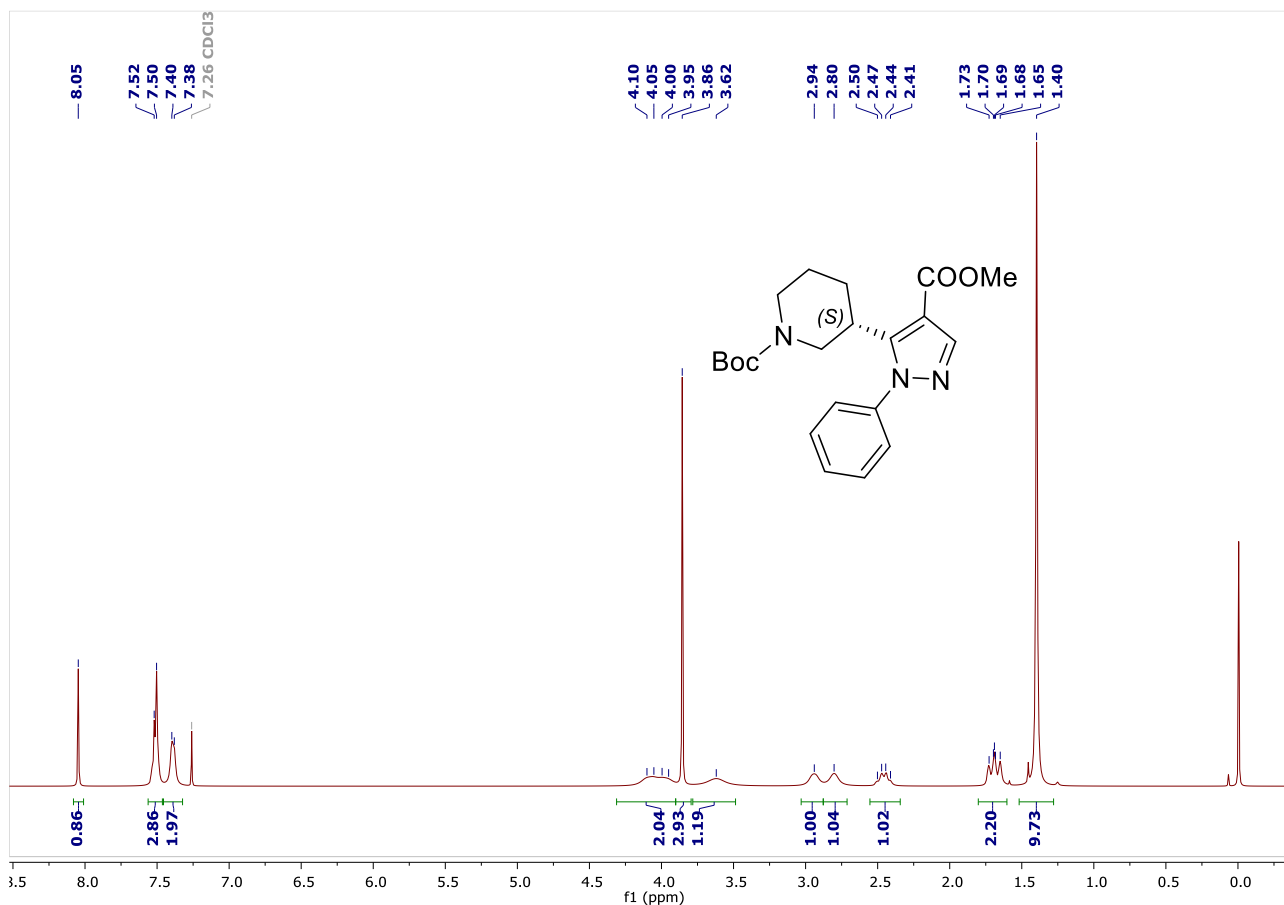

Figure S48. *tert*-Butyl (3*S*)-3-[4-(methoxycarbonyl)-1-phenyl-1*H*-pyrazol-5-yl]piperidine-1-carboxylate (5k). <sup>1</sup>H NMR spectrum (400 MHz, CDCl<sub>3</sub>).

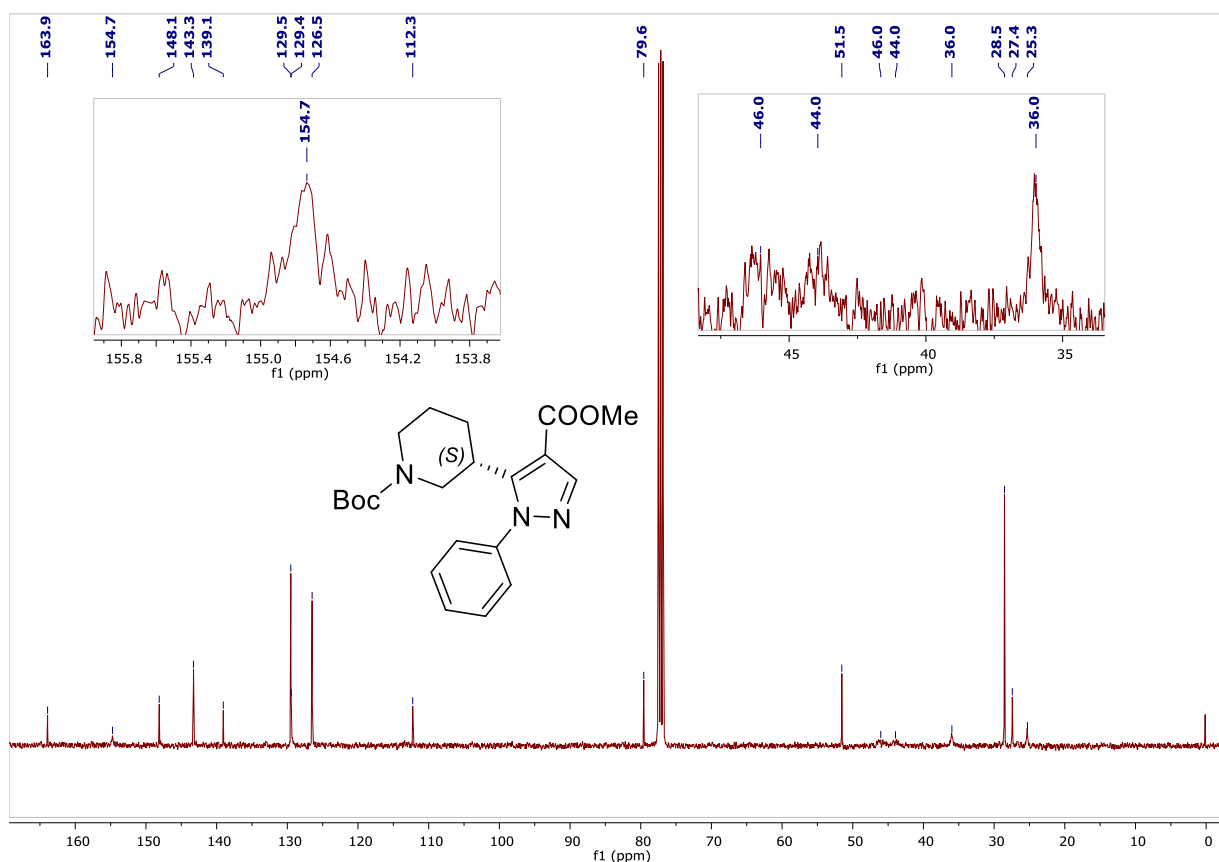

Figure S49. *tert*-Butyl (3*S*)-3-[4-(methoxycarbonyl)-1-phenyl-1*H*-pyrazol-5-yl]piperidine-1-carboxylate (5k). <sup>13</sup>C NMR spectrum (101 MHz, CDCl<sub>3</sub>).

# Compound Spectrum SmartFormula Report

## Analysis Info

Analysis Name D:\Data\GMP-146.d  
 Method DirectInfusion\_TuneLow\_pos.m  
 Sample Name GMP-146  
 Comment AB

Acquisition Date 2/5/2021 12:21:40 AM

Operator hplc  
 Instrument micrOTOF-Q III 8228888.20448

## Acquisition Parameter

|             |            |                       |           |                  |           |
|-------------|------------|-----------------------|-----------|------------------|-----------|
| Source Type | ESI        | Ion Polarity          | Positive  | Set Nebulizer    | 0.4 Bar   |
| Focus       | Not active | Set Capillary         | 4500 V    | Set Dry Heater   | 180 °C    |
| Scan Begin  | 50 m/z     | Set End Plate Offset  | -500 V    | Set Dry Gas      | 4.0 l/min |
| Scan End    | 1000 m/z   | Set Collision Cell RF | 140.0 Vpp | Set Divert Valve | Waste     |

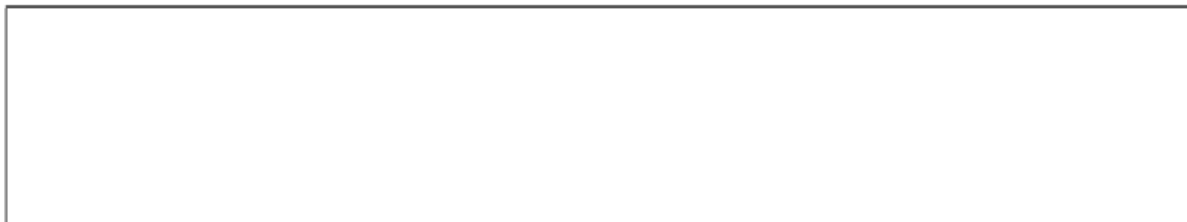

| #    | RT [min] | Area | Int. Type       | I    | S/N  | Chromatogram | Max. m/z | FWHM [min] |
|------|----------|------|-----------------|------|------|--------------|----------|------------|
| n.a. | 2.3      | n.a. | Single spectrum | n.a. | n.a. | n.a.         | 408.1892 | n.a.       |

## +MS, 2.3min #140

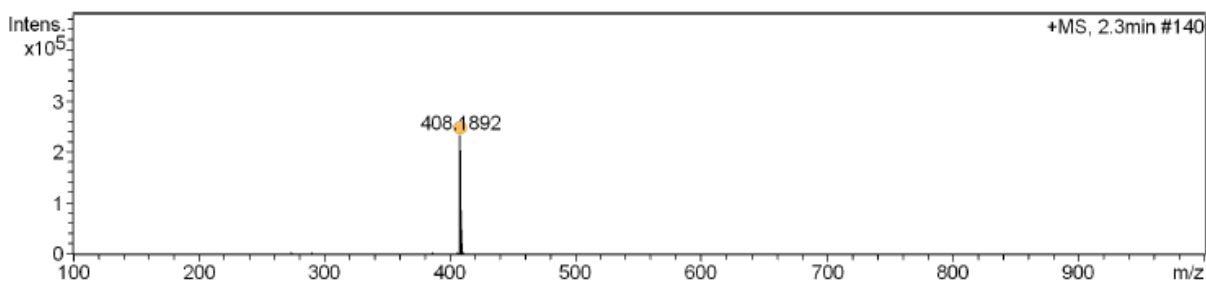

| Meas. m/z | # | Ion Formula                                                     | m/z      | err [ppm] | mSigma | # Sigma | Score  | rdB | e <sup>-</sup> Conf | N-Rule |
|-----------|---|-----------------------------------------------------------------|----------|-----------|--------|---------|--------|-----|---------------------|--------|
| 408.1892  | 1 | C <sub>21</sub> H <sub>27</sub> N <sub>3</sub> NaO <sub>4</sub> | 408.1894 | 0.4       | 1.8    | 1       | 100.00 | 9.5 | even                | ok     |

**Figure S50.** *tert*-Butyl (3*S*)-3-[4-(methoxycarbonyl)-1-phenyl-1*H*-pyrazol-5-yl]piperidine-1-carboxylate (5k). HRMS (ESI-TOF).

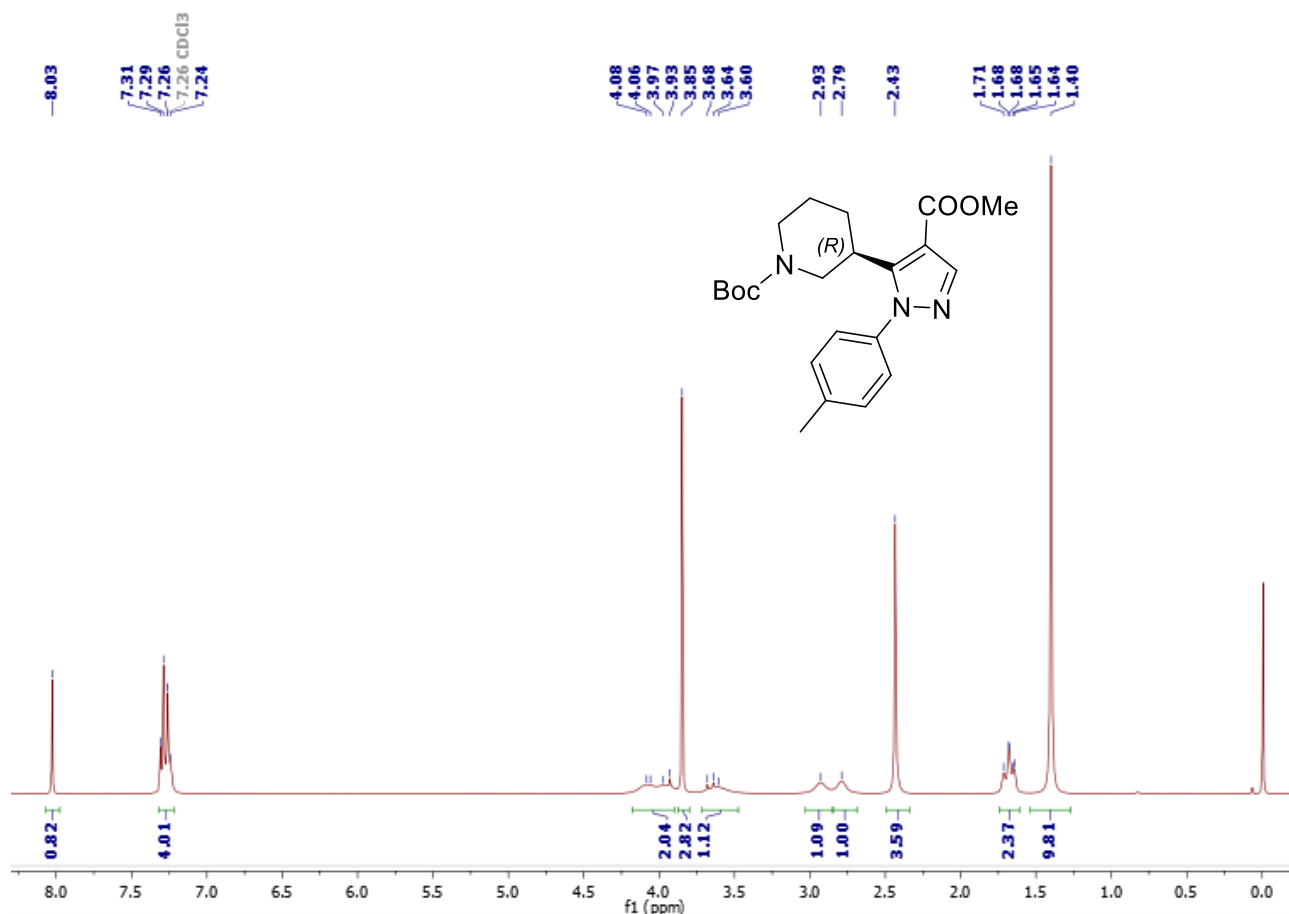

Figure S51. *tert*-Butyl (3*R*)-3-[4-(methoxycarbonyl)-1-(4-methylphenyl)-1*H*-pyrazol-5-yl]piperidine-1-carboxylate (5l). <sup>1</sup>H NMR spectrum (400 MHz, CDCl<sub>3</sub>).

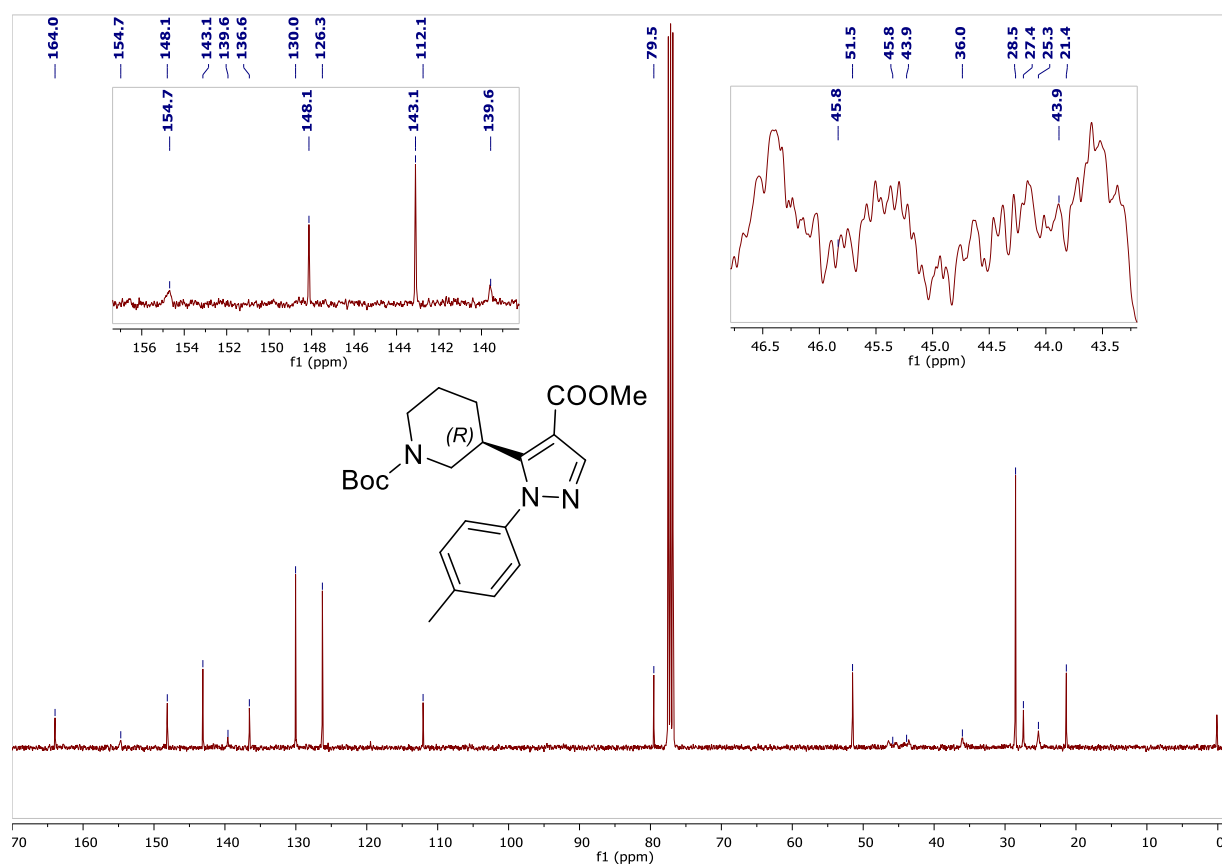

Figure S52. *tert*-Butyl (3*R*)-3-[4-(methoxycarbonyl)-1-(4-methylphenyl)-1*H*-pyrazol-5-yl]piperidine-1-carboxylate (5l). <sup>13</sup>C NMR spectrum (101 MHz, CDCl<sub>3</sub>).

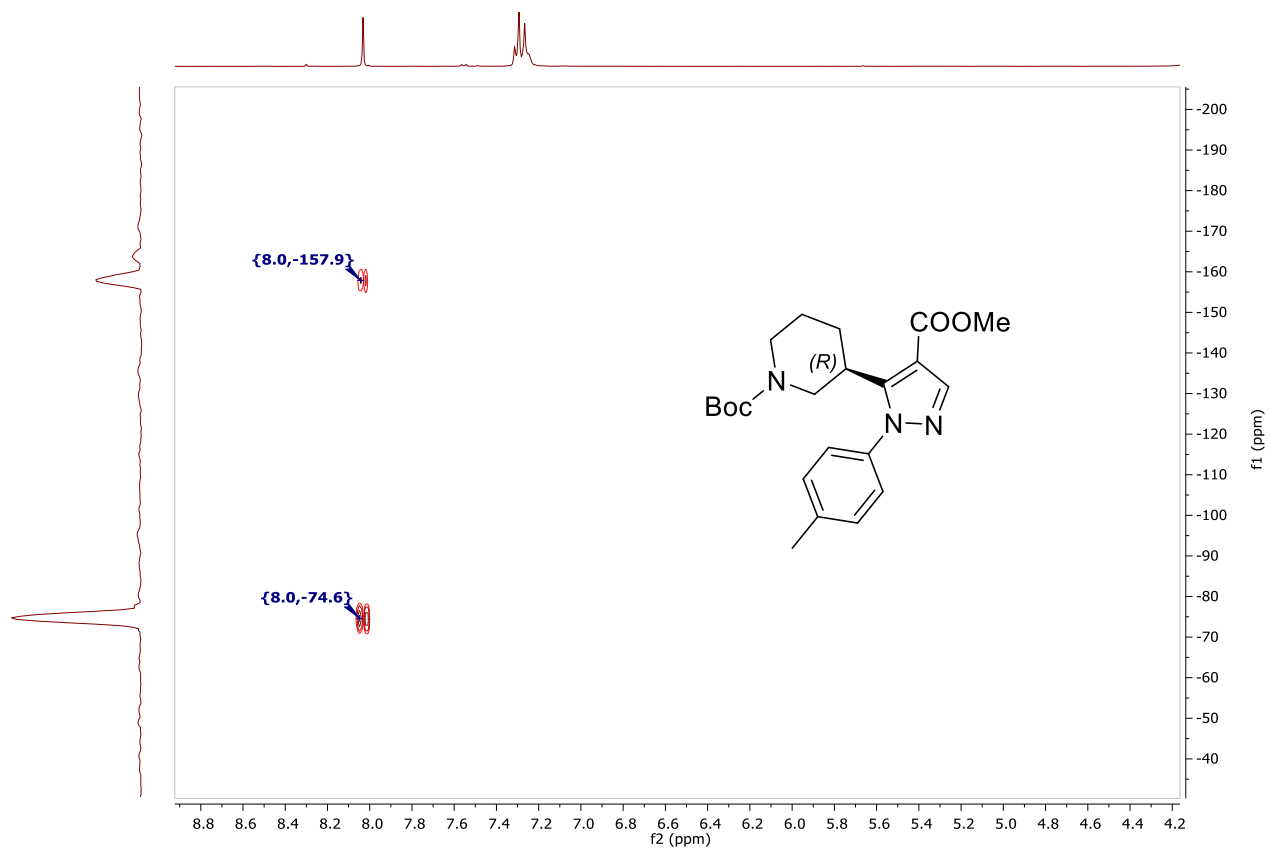

**Figure S53.** *tert*-Butyl (3*R*)-3-[4-(methoxycarbonyl)-1-(4-methylphenyl)-1*H*-pyrazol-5-yl]piperidine-1-carboxylate (51).  $^1\text{H}$ - $^{15}\text{N}$  HMBC spectrum (41 MHz,  $\text{CDCl}_3$ ).



# Compound Spectrum SmartFormula Report

## Analysis Info

Analysis Name D:\Data\GMP-116.d  
 Method DirectInfusion\_TuneLow\_pos.m  
 Sample Name GMP-116  
 Comment AB

Acquisition Date 2/5/2021 12:09:00 AM

Operator hplc  
 Instrument micrOTOF-Q III 8228888.20448

## Acquisition Parameter

|             |            |                       |           |                  |           |
|-------------|------------|-----------------------|-----------|------------------|-----------|
| Source Type | ESI        | Ion Polarity          | Positive  | Set Nebulizer    | 0.4 Bar   |
| Focus       | Not active | Set Capillary         | 4500 V    | Set Dry Heater   | 180 °C    |
| Scan Begin  | 50 m/z     | Set End Plate Offset  | -500 V    | Set Dry Gas      | 4.0 l/min |
| Scan End    | 1000 m/z   | Set Collision Cell RF | 140.0 Vpp | Set Divert Valve | Waste     |

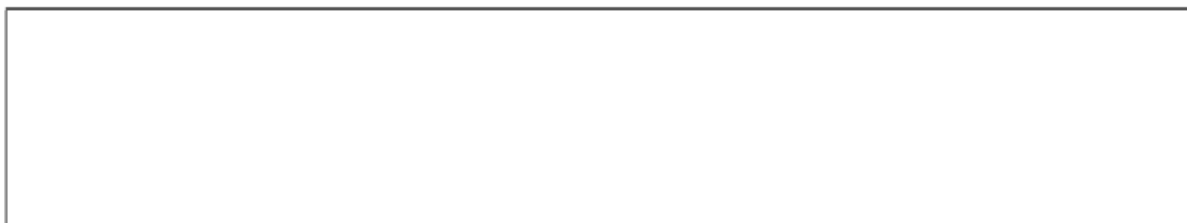

| #    | RT [min] | Area | Int. Type       | I    | S/N  | Chromatogram | Max. m/z | FWHM [min] |
|------|----------|------|-----------------|------|------|--------------|----------|------------|
| n.a. | 3.3      | n.a. | Single spectrum | n.a. | n.a. | n.a.         | 422.2052 | n.a.       |

## +MS, 3.3min #196

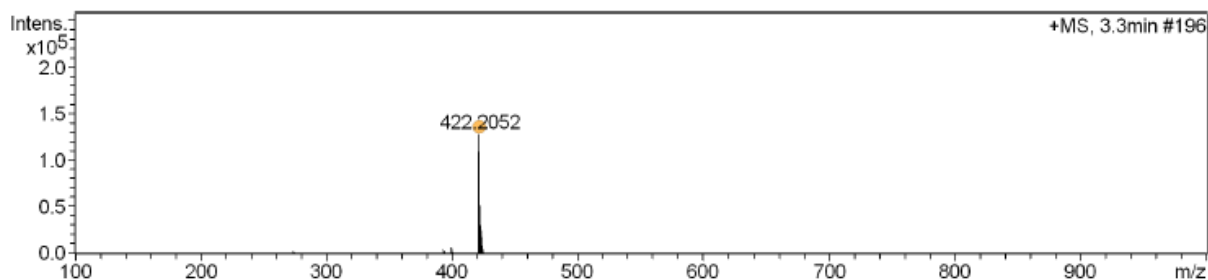

| Meas. m/z | # | Ion Formula  | m/z      | err [ppm] | mSigma | # Sigma | Score  | rdb | e <sup>-</sup> Conf | N-Rule |
|-----------|---|--------------|----------|-----------|--------|---------|--------|-----|---------------------|--------|
| 422.2052  | 1 | C22H29N3NaO4 | 422.2050 | -0.3      | 3.3    | 1       | 100.00 | 9.5 | even                | ok     |

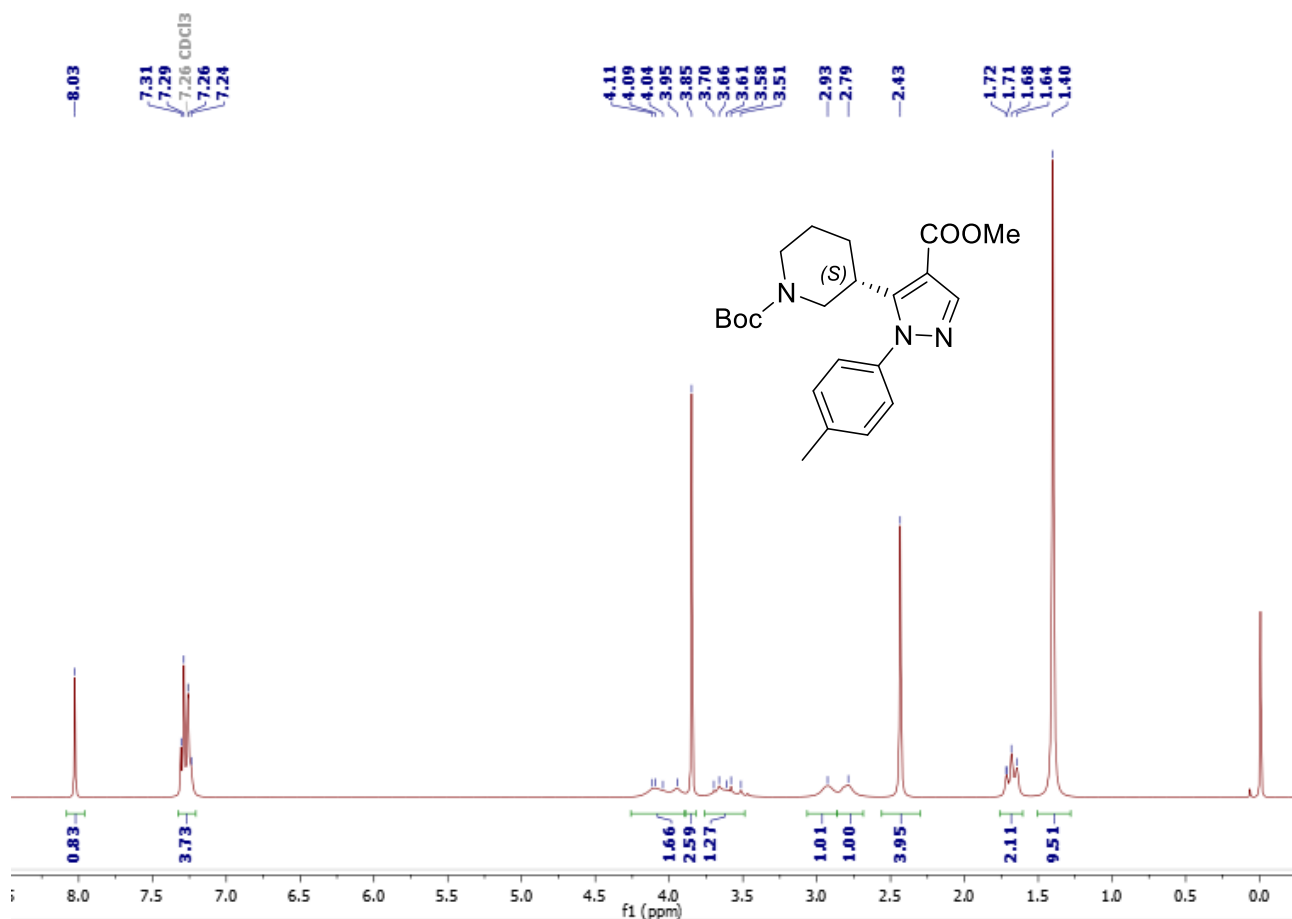

Figure S55. *tert*-Butyl (3*S*)-3-[4-(methoxycarbonyl)-1-(4-methylphenyl)-1*H*-pyrazol-5-yl]piperidine-1-carboxylate (5m). <sup>1</sup>H NMR spectrum (400 MHz, CDCl<sub>3</sub>).

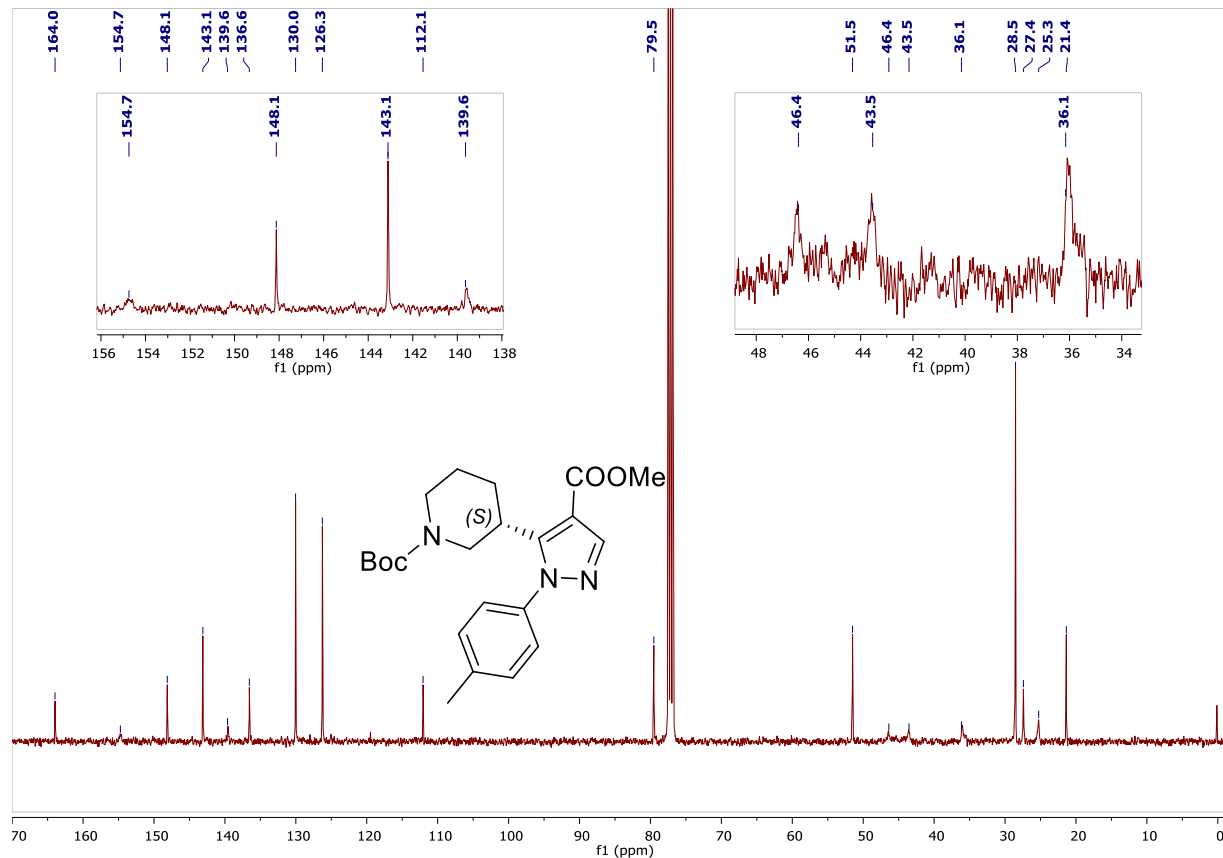

Figure S56. *tert*-Butyl (3*S*)-3-[4-(methoxycarbonyl)-1-(4-methylphenyl)-1*H*-pyrazol-5-yl]piperidine-1-carboxylate (5m). <sup>13</sup>C NMR spectrum (101 MHz, CDCl<sub>3</sub>).

## Compound Spectrum SmartFormula Report

### Analysis Info

Analysis Name D:\Data\GMP-147.d  
Method DirectInfusion\_TuneLow\_pos.m  
Sample Name GMP-147  
Comment AB

Acquisition Date 2/4/2021 11:52:08 PM

Operator hplc  
Instrument micrOTOF-Q III 8228888.20448

### Acquisition Parameter

|             |            |                       |           |                  |           |
|-------------|------------|-----------------------|-----------|------------------|-----------|
| Source Type | ESI        | Ion Polarity          | Positive  | Set Nebulizer    | 0.4 Bar   |
| Focus       | Not active | Set Capillary         | 4500 V    | Set Dry Heater   | 180 °C    |
| Scan Begin  | 50 m/z     | Set End Plate Offset  | -500 V    | Set Dry Gas      | 4.0 l/min |
| Scan End    | 1000 m/z   | Set Collision Cell RF | 140.0 Vpp | Set Divert Valve | Waste     |



| #    | RT [min] | Area | Int. Type       | I    | S/N  | Chromatogram | Max. m/z | FWHM [min] |
|------|----------|------|-----------------|------|------|--------------|----------|------------|
| n.a. | 2.1      | n.a. | Single spectrum | n.a. | n.a. | n.a.         | 422.2051 | n.a.       |

### +MS, 2.1min #126

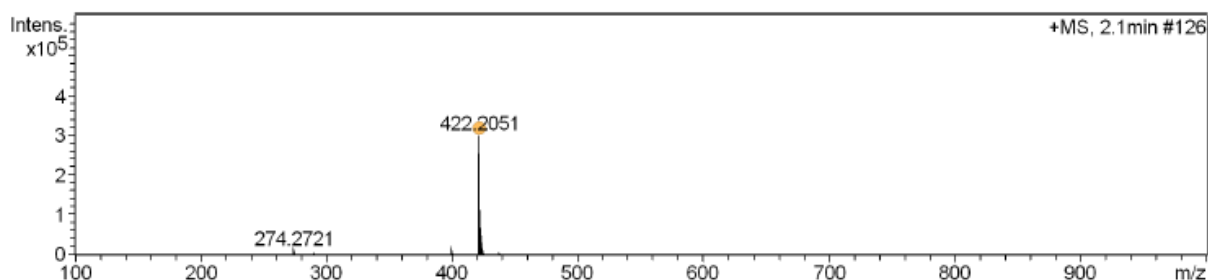

| Meas. m/z | # | Ion Formula  | m/z      | err [ppm] | mSigma | # Sigma | Score  | rdb | e <sup>-</sup> Conf | N-Rule |
|-----------|---|--------------|----------|-----------|--------|---------|--------|-----|---------------------|--------|
| 422.2051  | 1 | C22H29N3NaO4 | 422.2050 | -0.3      | 4.4    | 1       | 100.00 | 9.5 | even                | ok     |

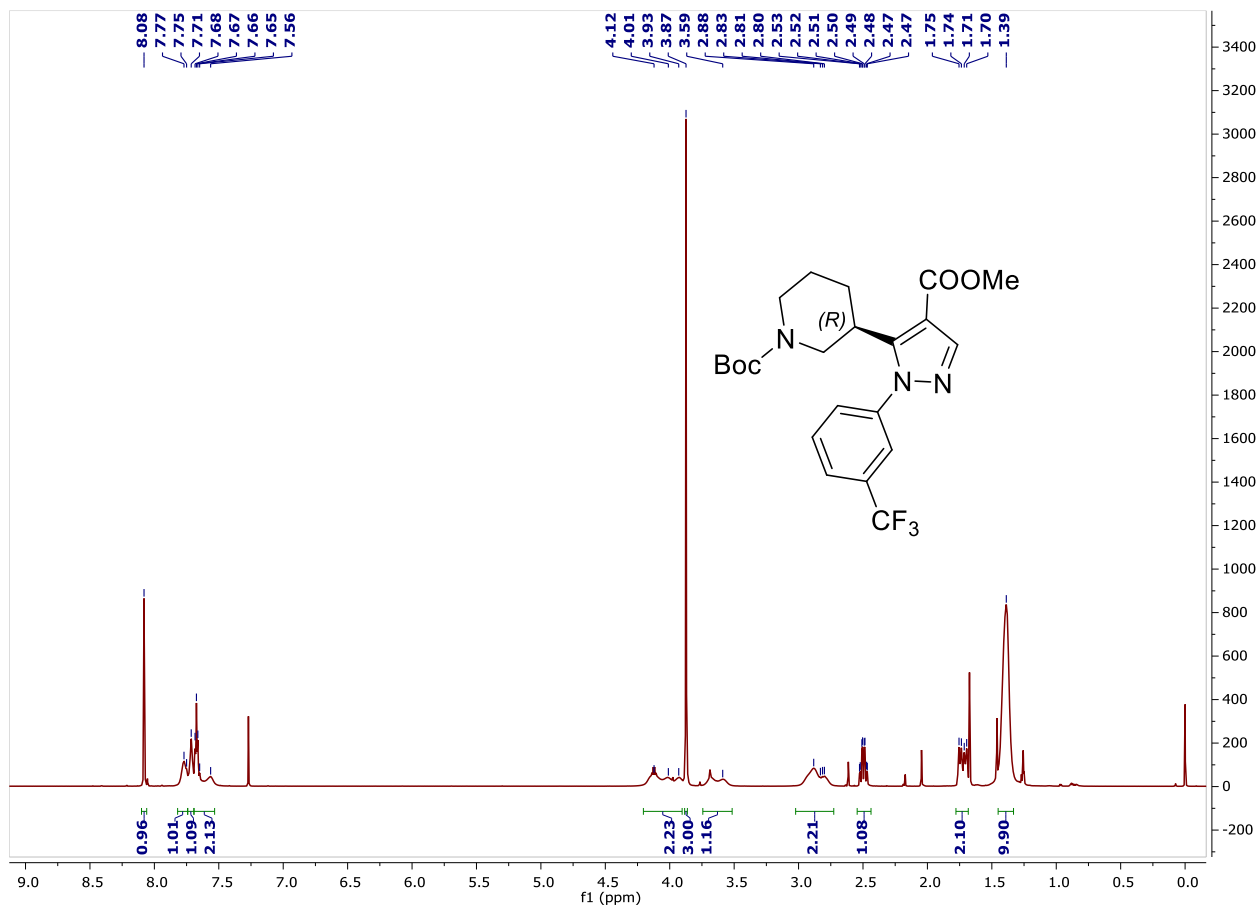

Figure S58. *tert*-Butyl (3*R*)-3-{4-(methoxycarbonyl)-1-[3-(trifluoromethyl)phenyl]-1*H*-pyrazol-5-yl}piperidine-1-carboxylate (5n). <sup>1</sup>H NMR spectrum (700 MHz, CDCl<sub>3</sub>).

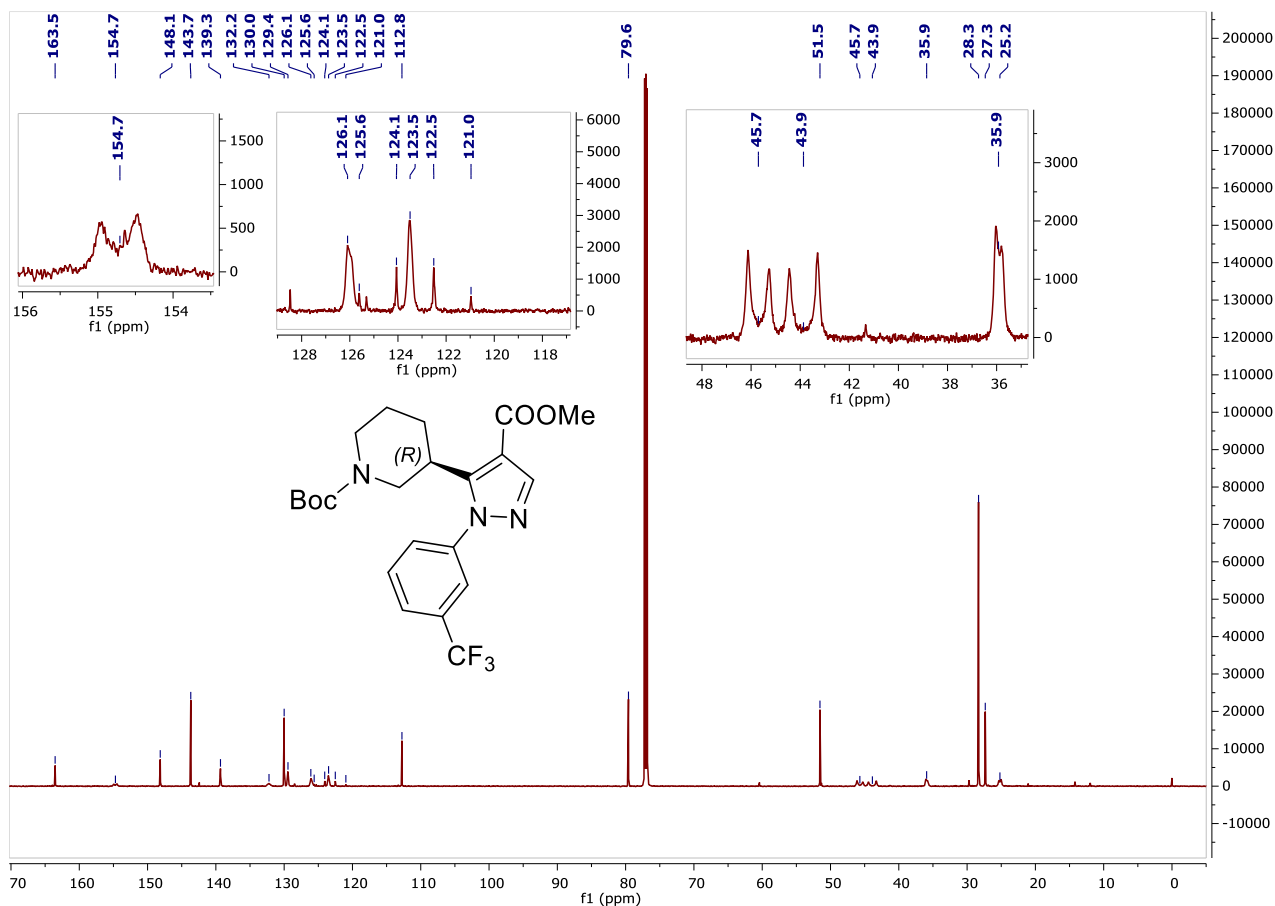

Figure S59. *tert*-Butyl (3*R*)-3-{4-(methoxycarbonyl)-1-[3-(trifluoromethyl)phenyl]-1*H*-pyrazol-5-yl}piperidine-1-carboxylate (5n). <sup>13</sup>C NMR spectrum (176 MHz, CDCl<sub>3</sub>).

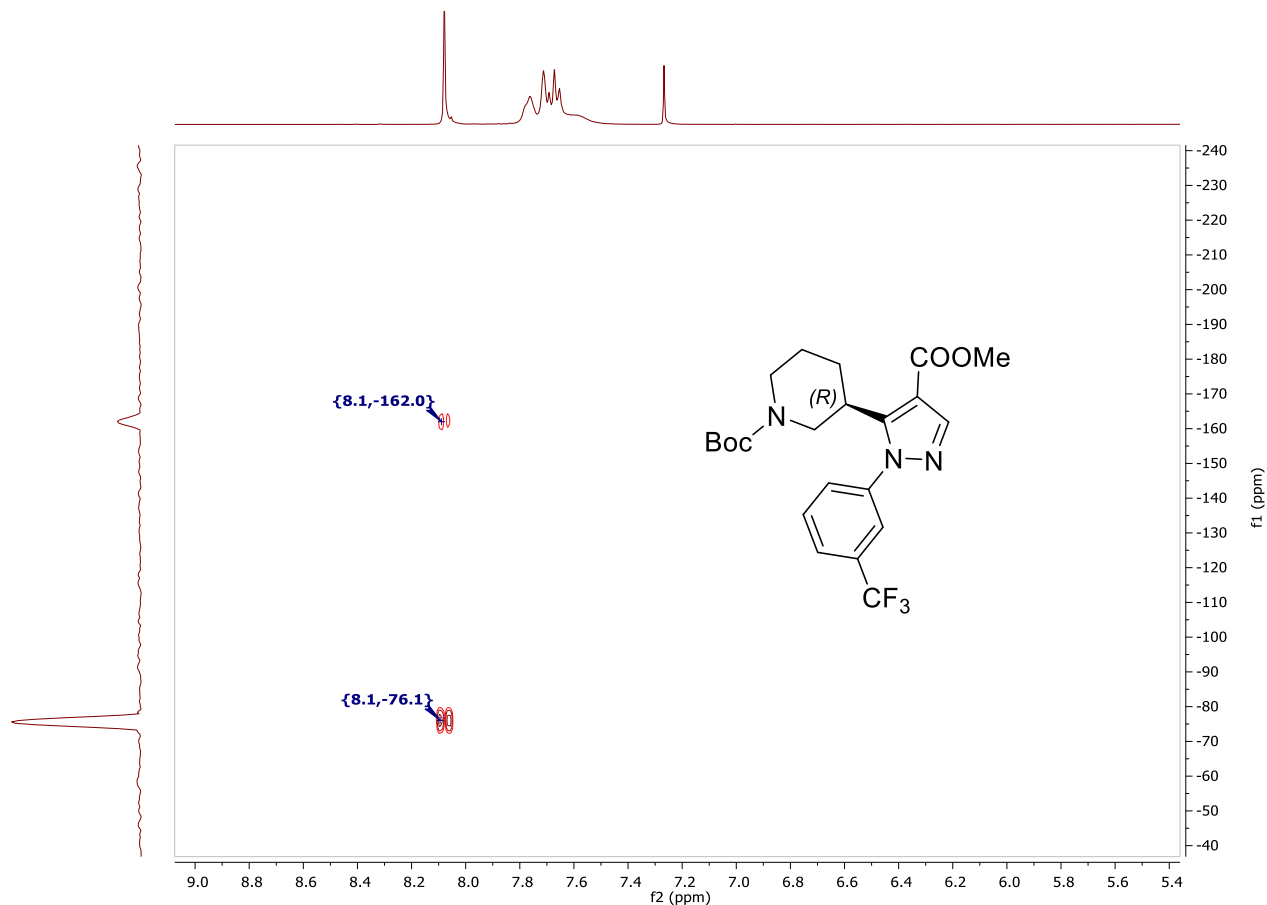

**Figure S60.** *tert*-Butyl (3*R*)-3-{4-(methoxycarbonyl)-1-[3-(trifluoromethyl)phenyl]-1*H*-pyrazol-5-yl}piperidine-1-carboxylate (5n).  $^1\text{H}$ - $^{15}\text{N}$  HMBC spectrum (41 MHz,  $\text{CDCl}_3$ ).

## Compound Spectrum SmartFormula Report

### Analysis Info

Analysis Name D:\Data\GMP-115.d  
Method DirectInfusion\_TuneLow\_pos.m  
Sample Name GMP-115  
Comment AB

Acquisition Date 2/5/2021 1:01:16 AM

Operator hplc  
Instrument micrOTOF-Q III 8228888.20448

### Acquisition Parameter

|             |            |                       |           |                  |           |
|-------------|------------|-----------------------|-----------|------------------|-----------|
| Source Type | ESI        | Ion Polarity          | Positive  | Set Nebulizer    | 0.4 Bar   |
| Focus       | Not active | Set Capillary         | 4500 V    | Set Dry Heater   | 180 °C    |
| Scan Begin  | 50 m/z     | Set End Plate Offset  | -500 V    | Set Dry Gas      | 4.0 l/min |
| Scan End    | 1000 m/z   | Set Collision Cell RF | 140.0 Vpp | Set Divert Valve | Waste     |

| #    | RT [min] | Area | Int. Type       | I    | S/N  | Chromatogram | Max. m/z | FWHM [min] |
|------|----------|------|-----------------|------|------|--------------|----------|------------|
| n.a. | 9.4      | n.a. | Single spectrum | n.a. | n.a. | n.a.         | 476.1769 | n.a.       |

### +MS, 9.4min #565

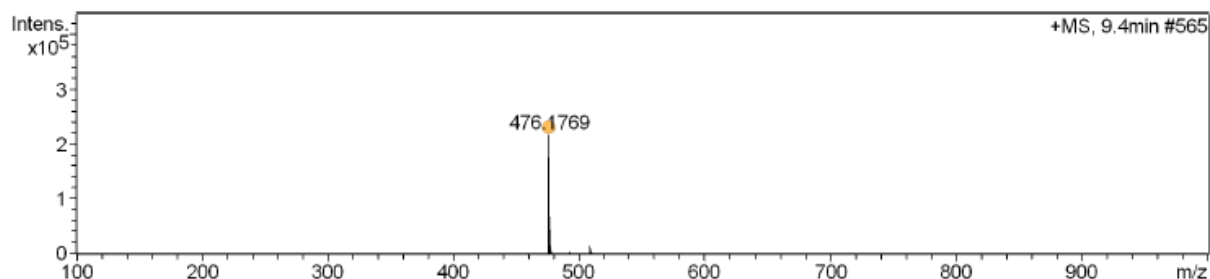

| Meas. m/z | # | Ion Formula    | m/z      | err [ppm] | mSigma | # Sigma | Score  | rdb | e <sup>-</sup> Conf | N-Rule |
|-----------|---|----------------|----------|-----------|--------|---------|--------|-----|---------------------|--------|
| 476.1769  | 1 | C22H26F3N3NaO4 | 476.1768 | -0.3      | 3.4    | 3       | 100.00 | 9.5 | even                | ok     |

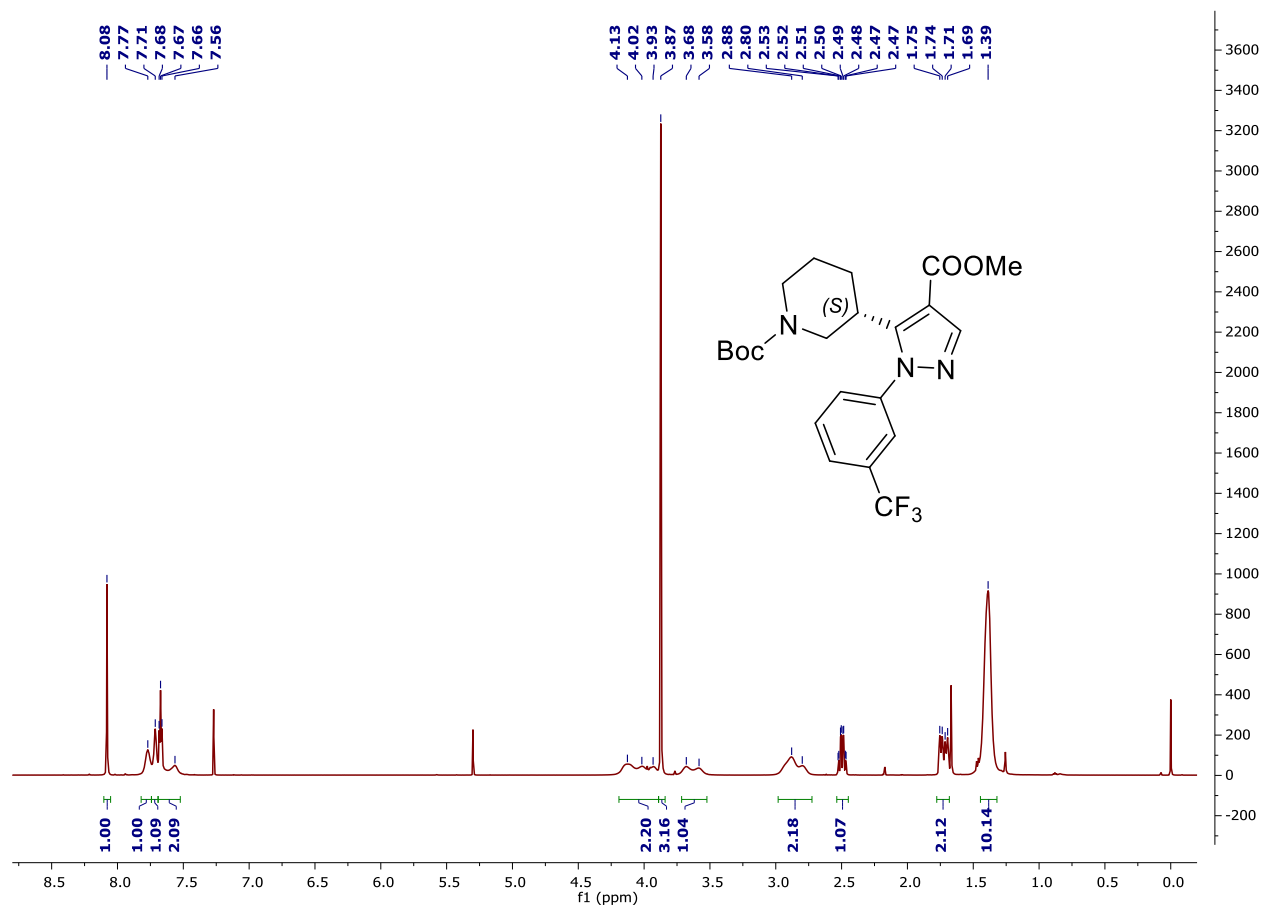

Figure S62. *tert*-Butyl (3*S*)-3-{4-(methoxycarbonyl)-1-[3-(trifluoromethyl)phenyl]-1*H*-pyrazol-5-yl}piperidine-1-carboxylate (5o). <sup>1</sup>H NMR spectrum (700 MHz, CDCl<sub>3</sub>).

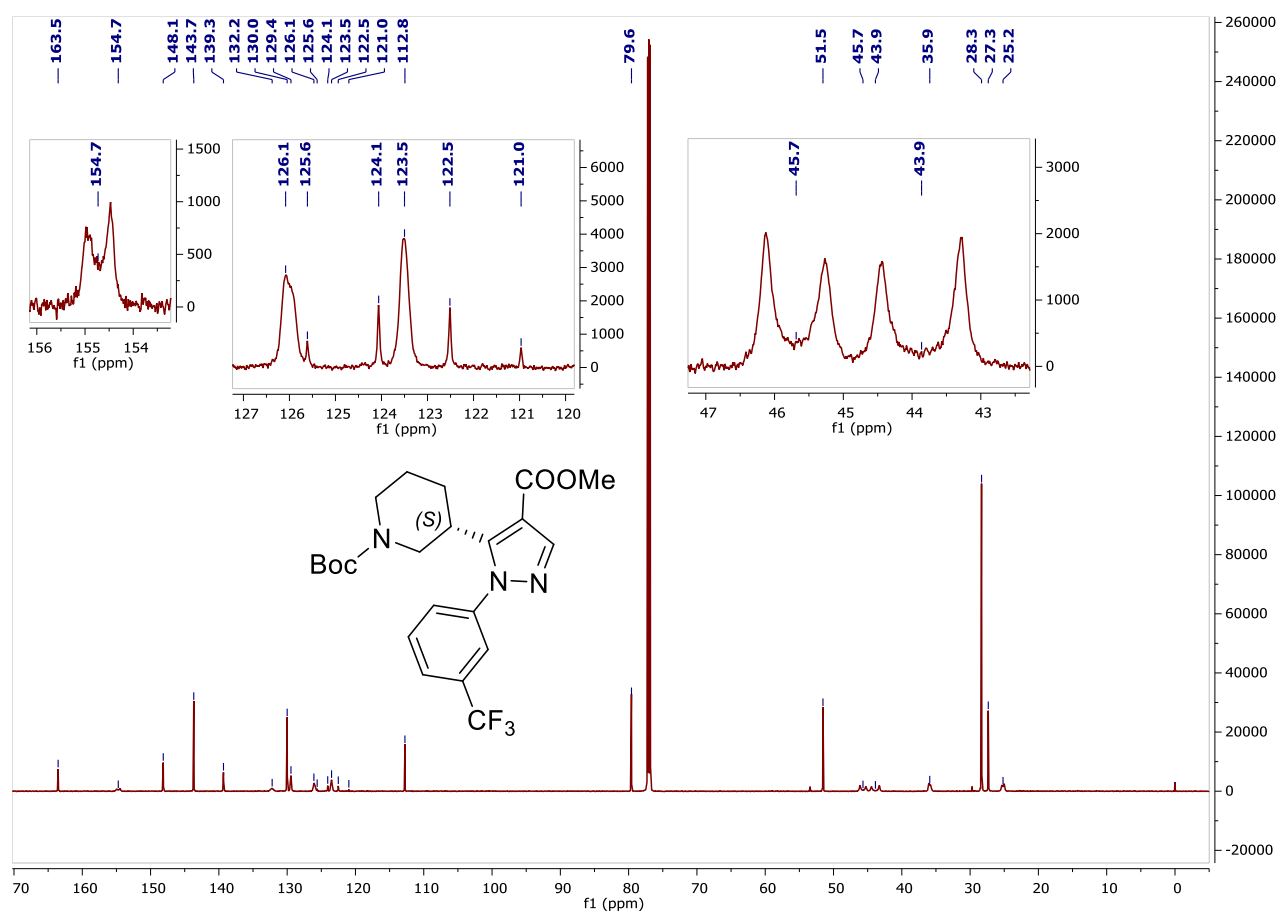

Figure S63. *tert*-Butyl (3*S*)-3-{4-(methoxycarbonyl)-1-[3-(trifluoromethyl)phenyl]-1*H*-pyrazol-5-yl}piperidine-1-carboxylate (5o). <sup>13</sup>C NMR spectrum (176 MHz, CDCl<sub>3</sub>).

# Compound Spectrum SmartFormula Report

## Analysis Info

Analysis Name D:\Data\GMP-148.d  
 Method DirectInfusion\_TuneLow\_pos.m  
 Sample Name GMP-148  
 Comment AB

Acquisition Date 2/4/2021 8:10:28 PM  
 Operator hplc  
 Instrument micrOTOF-Q III 8228888.20448

## Acquisition Parameter

|             |            |                       |           |                  |           |
|-------------|------------|-----------------------|-----------|------------------|-----------|
| Source Type | ESI        | Ion Polarity          | Positive  | Set Nebulizer    | 0.4 Bar   |
| Focus       | Not active | Set Capillary         | 4500 V    | Set Dry Heater   | 180 °C    |
| Scan Begin  | 50 m/z     | Set End Plate Offset  | -500 V    | Set Dry Gas      | 4.0 l/min |
| Scan End    | 1000 m/z   | Set Collision Cell RF | 140.0 Vpp | Set Divert Valve | Waste     |



| #    | RT [min] | Area | Int. Type       | I    | S/N  | Chromatogram | Max. m/z | FWHM [min] |
|------|----------|------|-----------------|------|------|--------------|----------|------------|
| n.a. | 9.2      | n.a. | Single spectrum | n.a. | n.a. | n.a.         | 476.1772 | n.a.       |

## +MS, 9.2min #552

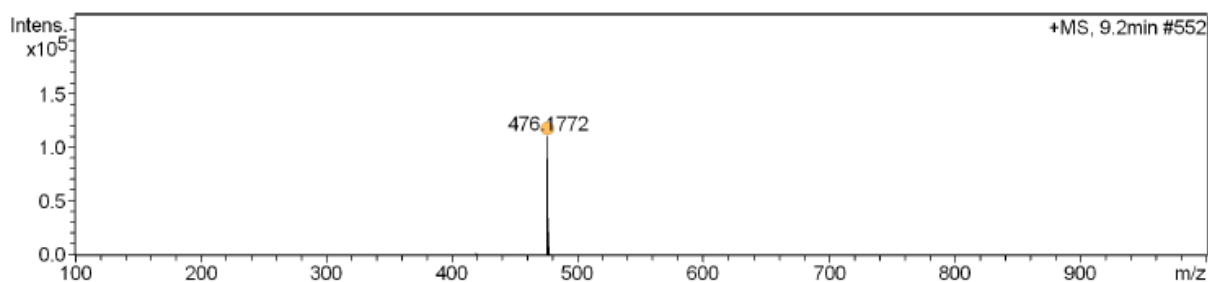

| Meas. m/z | # | Ion Formula    | m/z      | err [ppm] | mSigma | # Sigma | Score  | rdB | e <sup>-</sup> Conf | N-Rule |
|-----------|---|----------------|----------|-----------|--------|---------|--------|-----|---------------------|--------|
| 476.1772  | 1 | C22H26F3N3NaO4 | 476.1768 | -1.0      | 8.8    | 2       | 100.00 | 9.5 | even                | ok     |



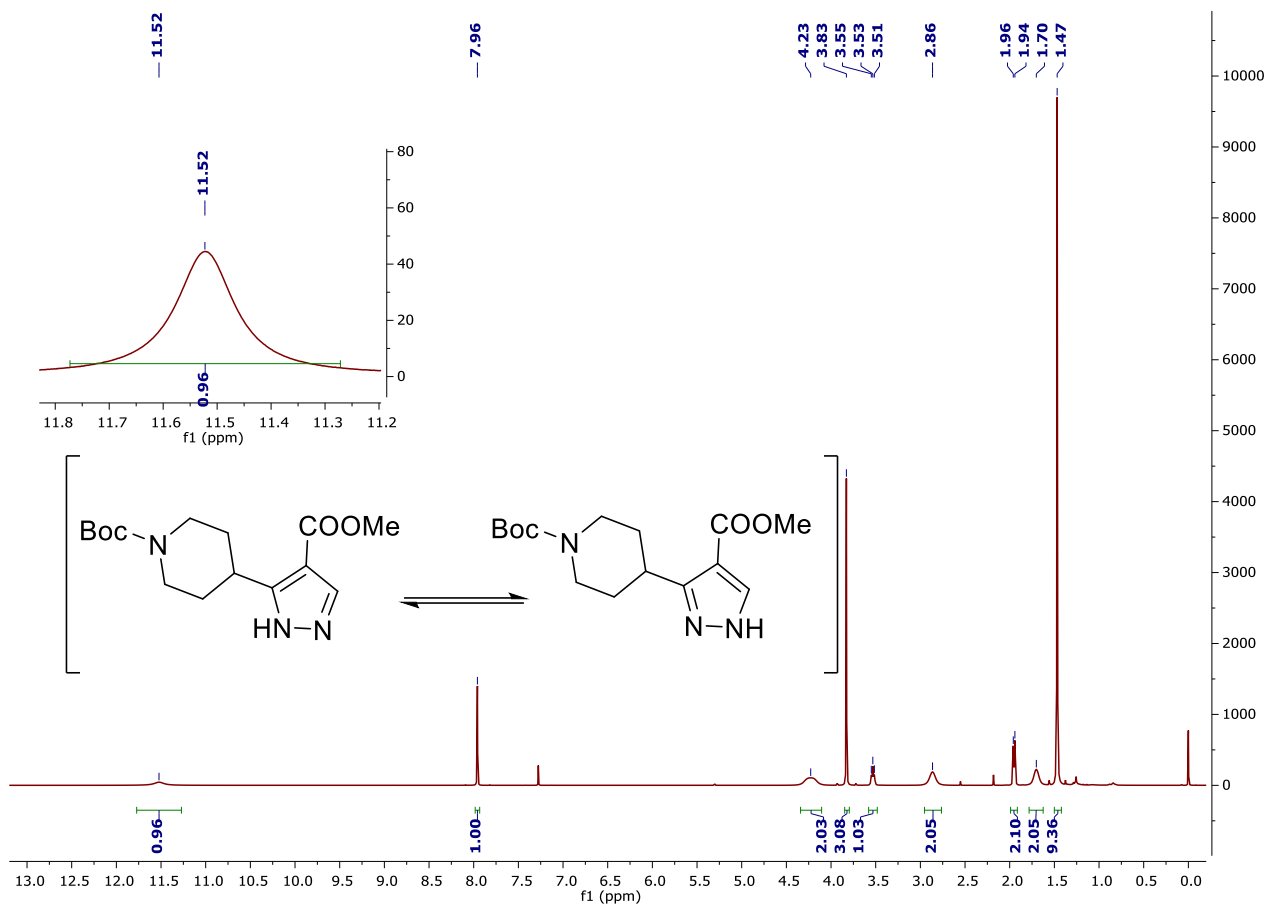

**Figure S65.** *tert*-Butyl 4-[4-(methoxycarbonyl)-1*H*-pyrazolyl]piperidine-1-carboxylate (**7**).  
<sup>1</sup>H NMR spectrum (700 MHz, CDCl<sub>3</sub>).

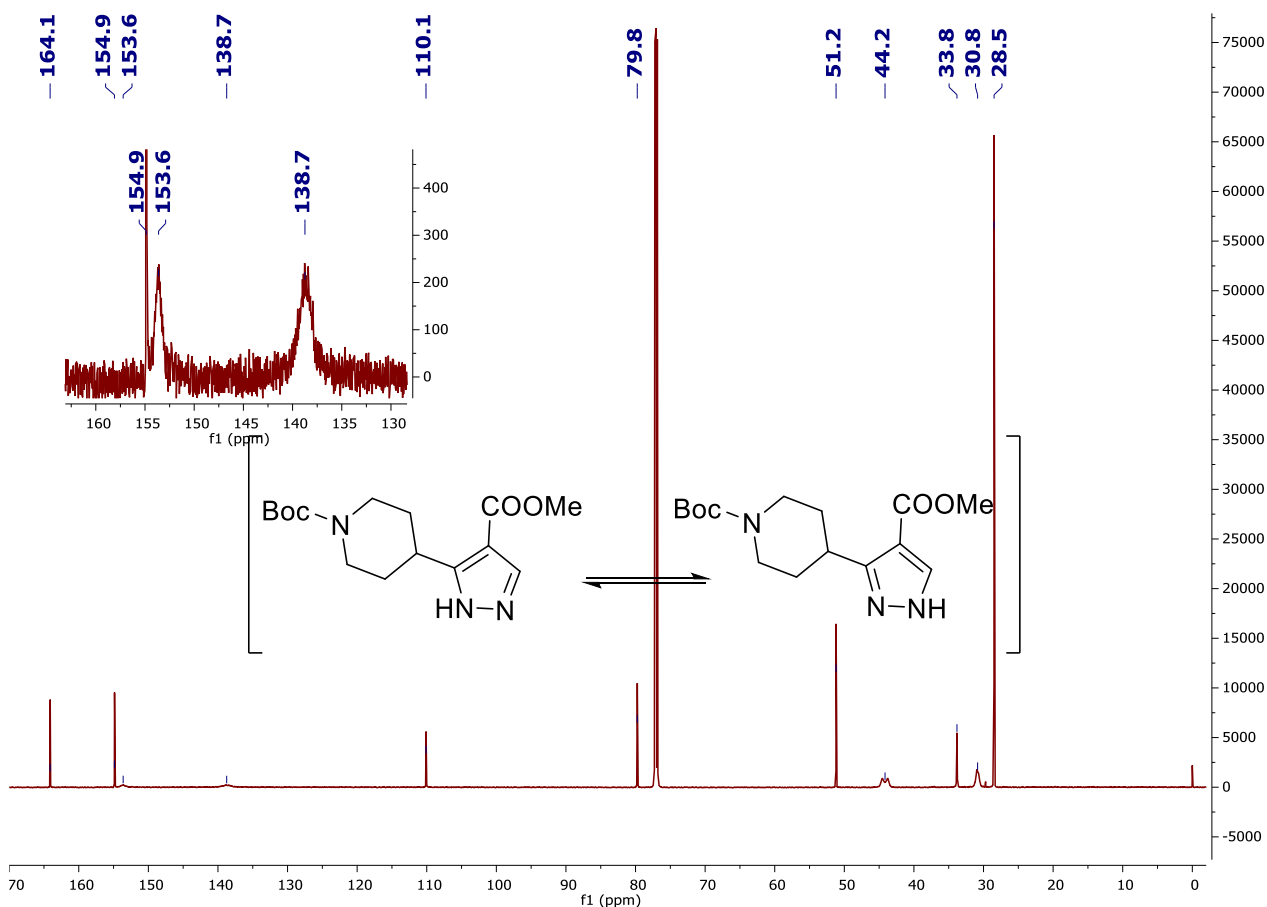

**Figure S66.** *tert*-Butyl 4-[4-(methoxycarbonyl)-1*H*-pyrazolyl]piperidine-1-carboxylate (**7**).  
<sup>13</sup>C NMR spectrum (176 MHz, CDCl<sub>3</sub>).

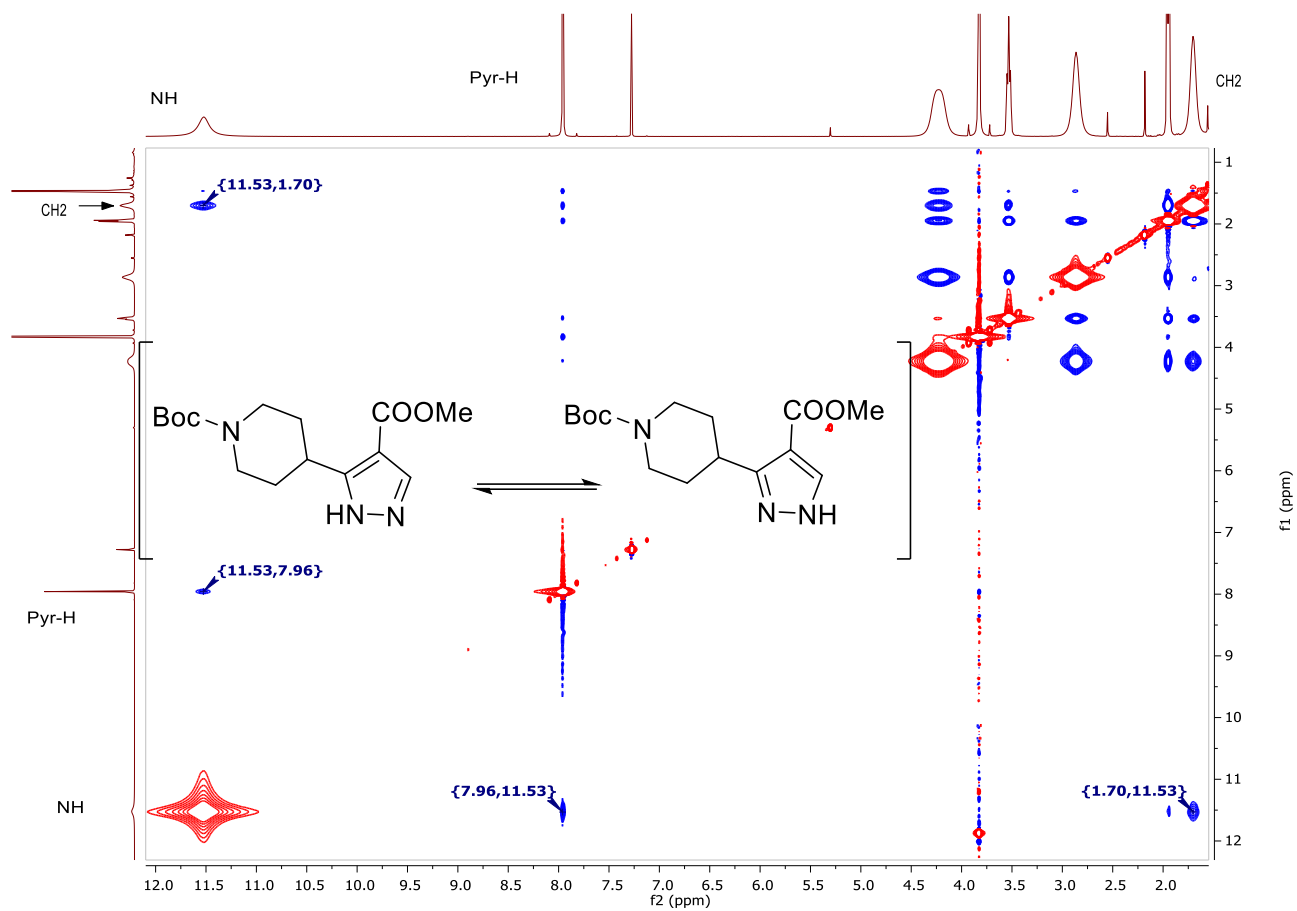

**Figure S67.** *tert*-Butyl 4-[4-(methoxycarbonyl)-1*H*-pyrazolyl]piperidine-1-carboxylate (7).  $^1\text{H}$ - $^1\text{H}$  NOESY spectrum ( $\text{CDCl}_3$ ).

# Compound Spectrum SmartFormula Report

## Analysis Info

Analysis Name D:\Data\GMP-018.d  
 Method DirectInfusion\_TuneLow\_pos.m  
 Sample Name GMP-018  
 Comment SB

Acquisition Date 11/27/2018 2:33:41 PM

Operator hplc  
 Instrument micrOTOF-Q III 8228888.20448

## Acquisition Parameter

|             |            |                       |           |                  |           |
|-------------|------------|-----------------------|-----------|------------------|-----------|
| Source Type | ESI        | Ion Polarity          | Positive  | Set Nebulizer    | 0.4 Bar   |
| Focus       | Not active | Set Capillary         | 4500 V    | Set Dry Heater   | 180 °C    |
| Scan Begin  | 50 m/z     | Set End Plate Offset  | -500 V    | Set Dry Gas      | 4.0 l/min |
| Scan End    | 1000 m/z   | Set Collision Cell RF | 140.0 Vpp | Set Divert Valve | Waste     |

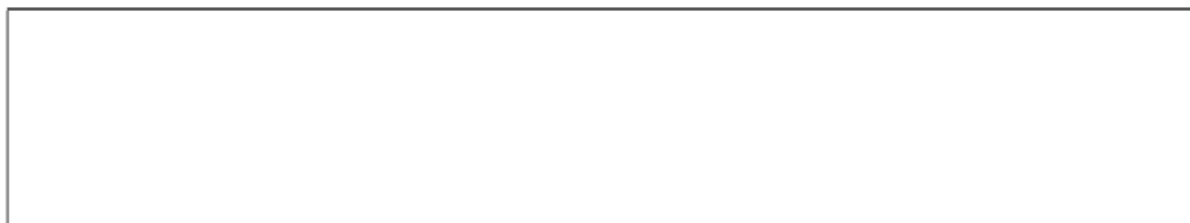

| #    | RT [min] | Area | Int. Type       | I    | S/N  | Chromatogram | Max. m/z | FWHM [min] |
|------|----------|------|-----------------|------|------|--------------|----------|------------|
| n.a. | 0.2      | n.a. | Single spectrum | n.a. | n.a. | n.a.         | 304.2632 | n.a.       |
| n.a. | 4.3      | n.a. | Single spectrum | n.a. | n.a. | n.a.         | 332.1581 | n.a.       |

## +MS, 4.3min #255

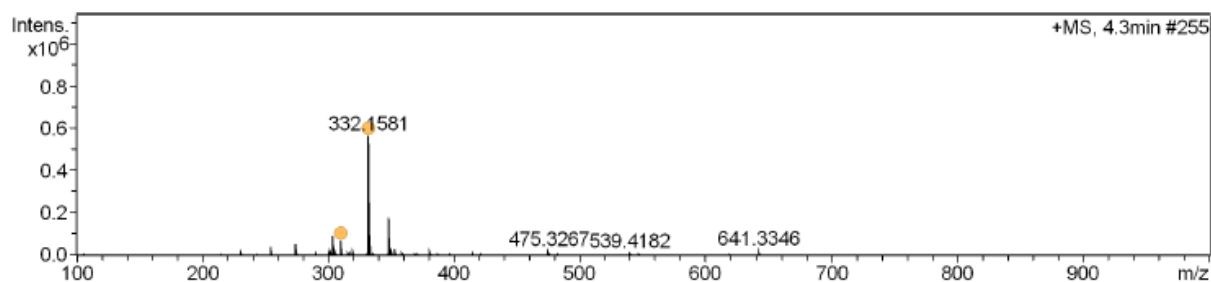

| Meas. m/z | # | Ion Formula  | m/z      | err [ppm] | mSigma | # Sigma | Score  | rdB | e <sup>-</sup> Conf | N-Rule |
|-----------|---|--------------|----------|-----------|--------|---------|--------|-----|---------------------|--------|
| 310.1759  | 1 | C15H24N3O4   | 310.1761 | -0.8      | 4.2    | 1       | 100.00 | 5.5 | even                | ok     |
| 332.1581  | 1 | C15H23N3NaO4 | 332.1581 | 0.1       | 1.0    | 1       | 100.00 | 5.5 | even                | ok     |

**Figure S68.** *tert*-Butyl 4-[4-(methoxycarbonyl)-1*H*-pyrazolyl]piperidine-1-carboxylate (7). HRMS (ESI-TOF).

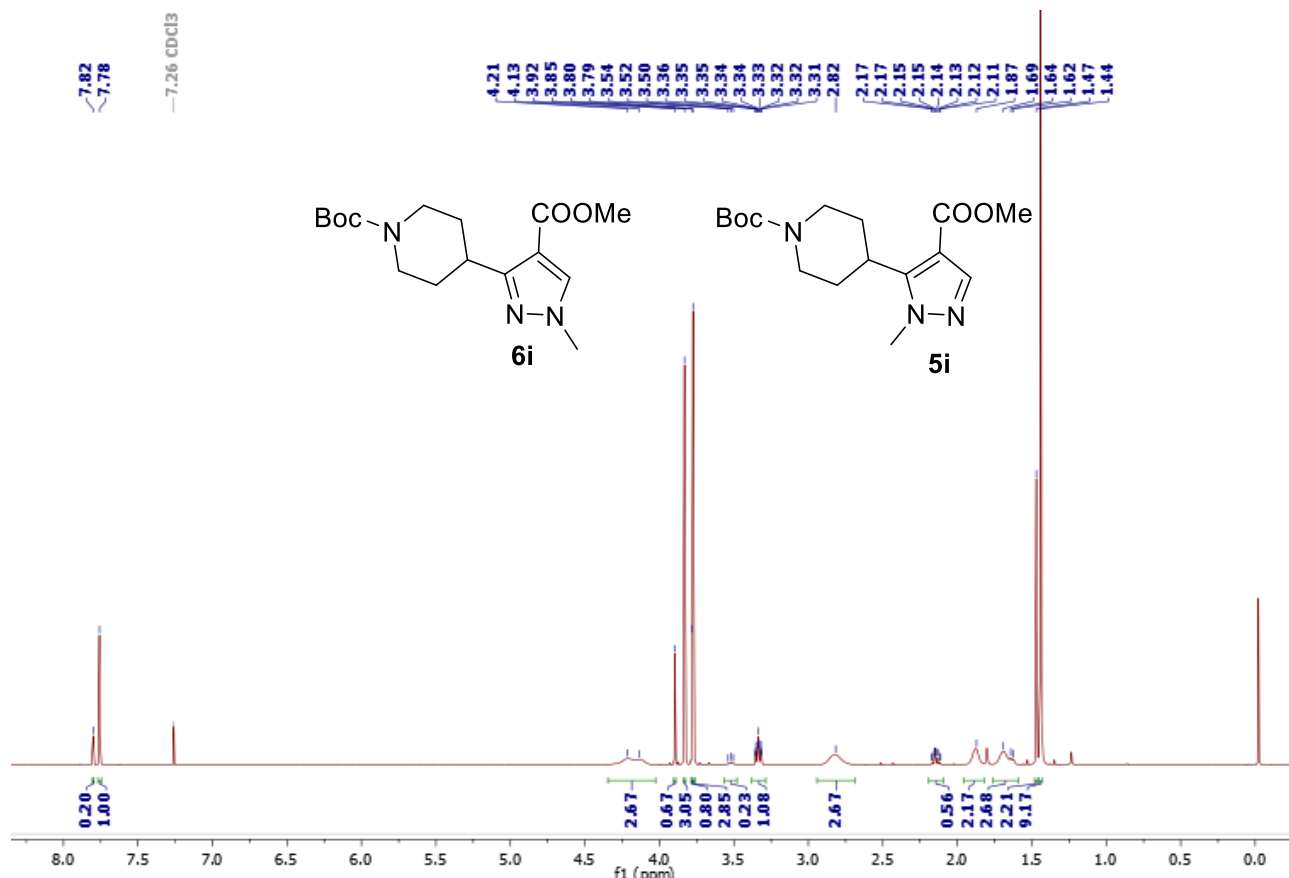

**Figure S69.** *tert*-Butyl 4-[4-(methoxycarbonyl)-1-methyl-1*H*-pyrazol-3-yl]piperidine-1-carboxylate (6i) and *tert*-butyl 4-[4-(methoxycarbonyl)-1-methyl-1*H*-pyrazol-5-yl]piperidine-1-carboxylate (5i). <sup>1</sup>H NMR spectrum (700 MHz, CDCl<sub>3</sub>).

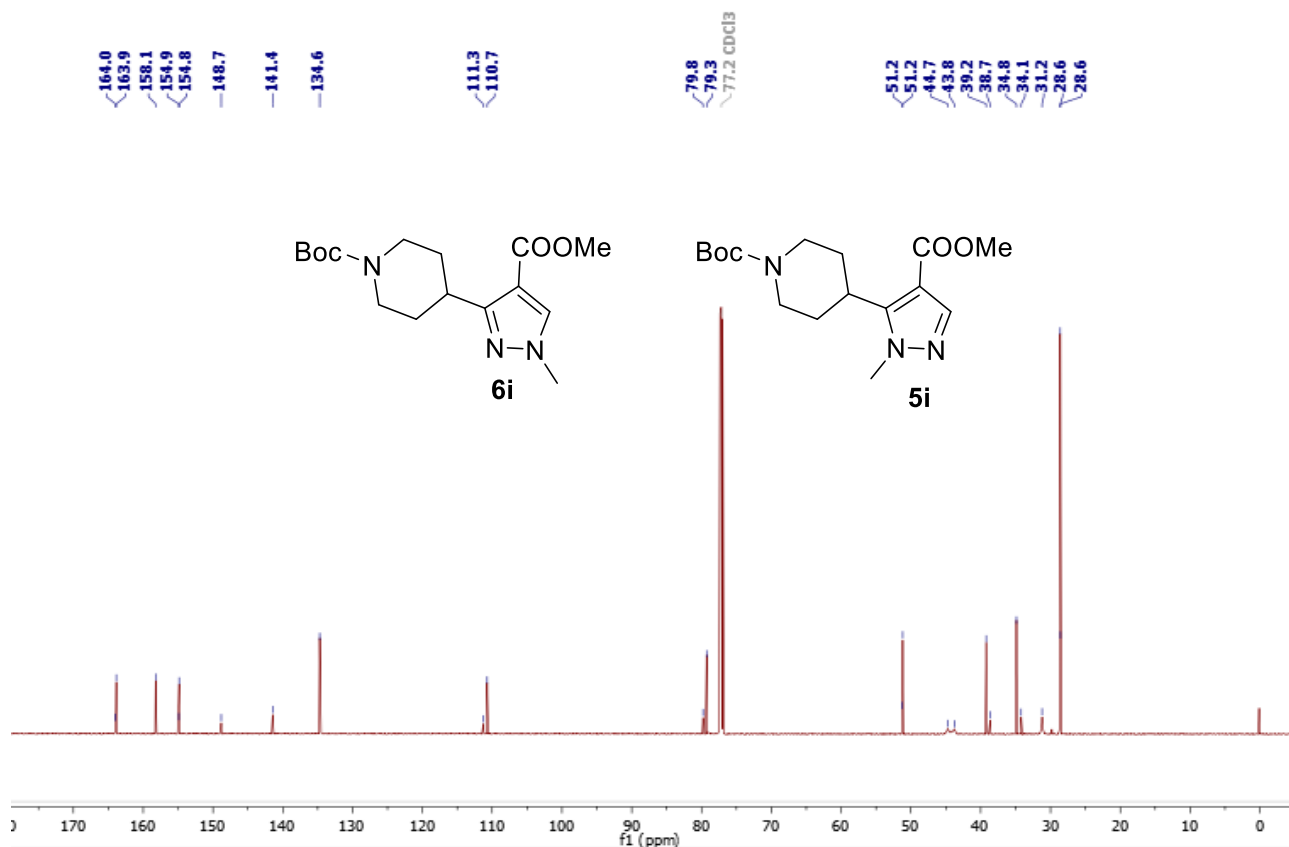

**Figure S70.** *tert*-Butyl 4-[4-(methoxycarbonyl)-1-methyl-1*H*-pyrazol-3-yl]piperidine-1-carboxylate (6i) and *tert*-butyl 4-[4-(methoxycarbonyl)-1-methyl-1*H*-pyrazol-5-yl]piperidine-1-carboxylate (5i). <sup>13</sup>C NMR spectrum (176 MHz, CDCl<sub>3</sub>).

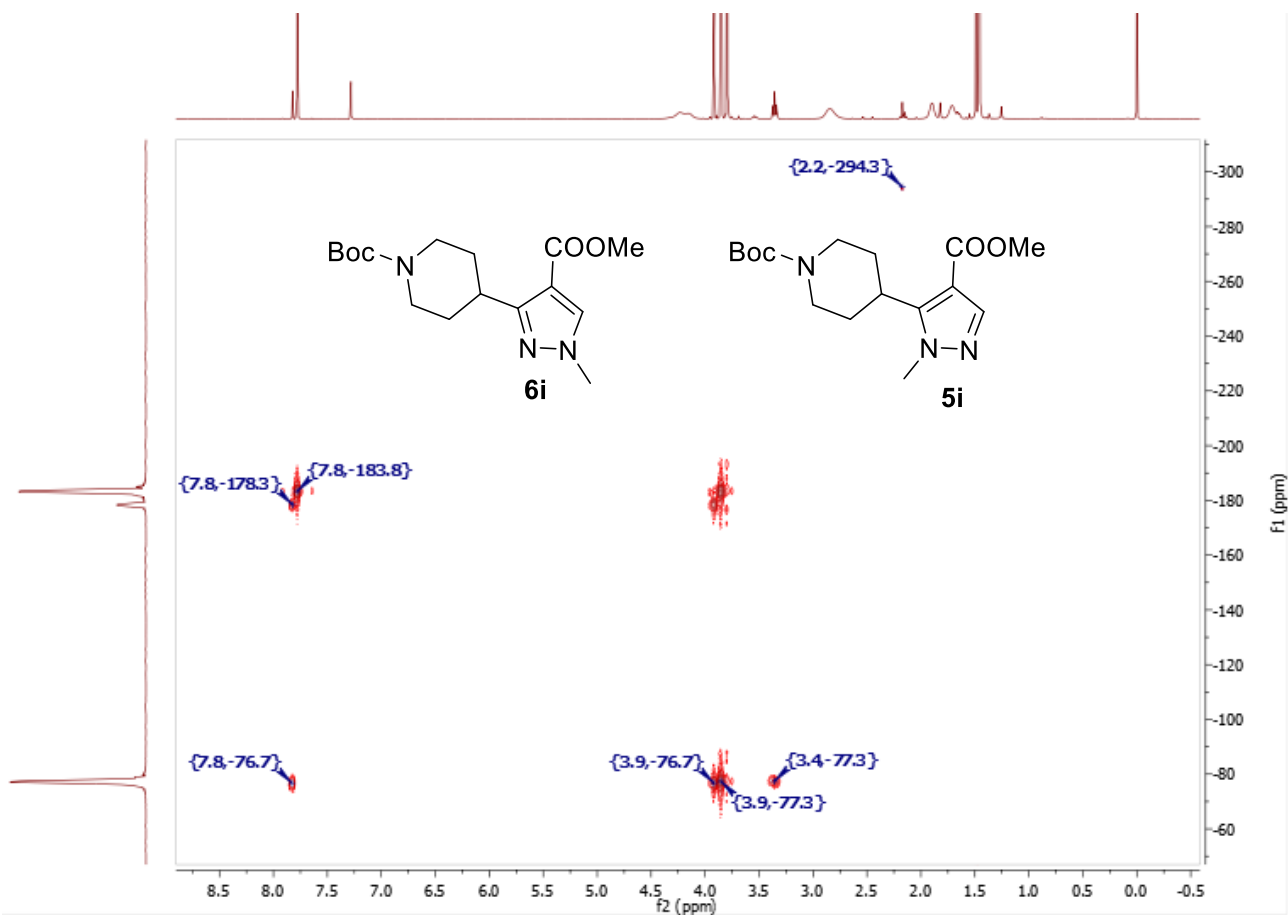

**Figure S71.** *tert*-Butyl 4-[4-(methoxycarbonyl)-1-methyl-1*H*-pyrazol-3-yl]piperidine-1-carboxylate (**6i**) and *tert*-butyl 4-[4-(methoxycarbonyl)-1-methyl-1*H*-pyrazol-5-yl]piperidine-1-carboxylate (**5i**).  $^1\text{H}$ - $^{15}\text{N}$  HMBC spectrum (71 MHz,  $\text{CDCl}_3$ ).

# Compound Spectrum SmartFormula Report

## Analysis Info

Analysis Name D:\Data\GMP-517.d  
 Method DirectInfusion\_TuneLow\_pos.m  
 Sample Name GMP-517  
 Comment AB

Acquisition Date 2/4/2021 11:12:05 PM

Operator hplc  
 Instrument micrOTOF-Q III 8228888.20448

## Acquisition Parameter

|             |            |                       |           |                  |           |
|-------------|------------|-----------------------|-----------|------------------|-----------|
| Source Type | ESI        | Ion Polarity          | Positive  | Set Nebulizer    | 0.4 Bar   |
| Focus       | Not active | Set Capillary         | 4500 V    | Set Dry Heater   | 180 °C    |
| Scan Begin  | 50 m/z     | Set End Plate Offset  | -500 V    | Set Dry Gas      | 4.0 l/min |
| Scan End    | 1000 m/z   | Set Collision Cell RF | 140.0 Vpp | Set Divert Valve | Waste     |

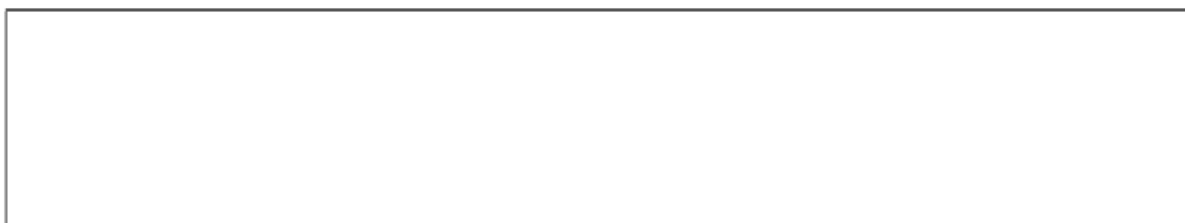

| #    | RT [min] | Area | Int. Type       | I    | S/N  | Chromatogram | Max. m/z | FWHM [min] |
|------|----------|------|-----------------|------|------|--------------|----------|------------|
| n.a. | 6.9      | n.a. | Single spectrum | n.a. | n.a. | n.a.         | 346.1737 | n.a.       |

## +MS, 6.9min #411

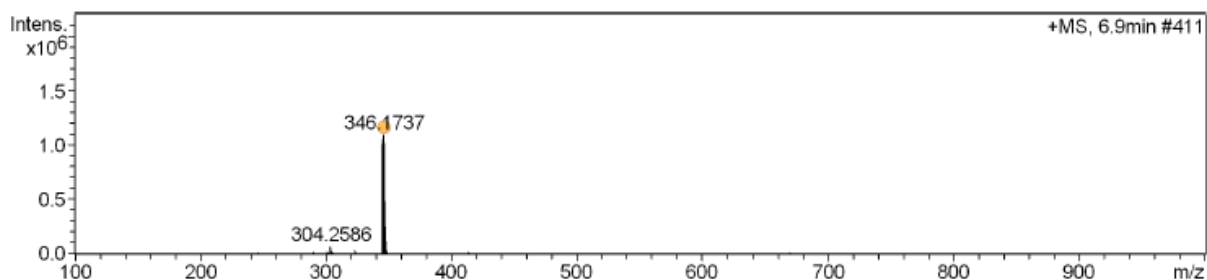

| Meas. m/z | # | Ion Formula                                                     | m/z      | err [ppm] | mSigma | # Sigma | Score  | rdb | e <sup>-</sup> Conf | N-Rule |
|-----------|---|-----------------------------------------------------------------|----------|-----------|--------|---------|--------|-----|---------------------|--------|
| 346.1737  | 1 | C <sub>16</sub> H <sub>25</sub> N <sub>3</sub> NaO <sub>4</sub> | 346.1737 | -0.1      | 37.5   | 1       | 100.00 | 5.5 | even                | ok     |

**Figure S72.** *tert*-Butyl 4-[4-(methoxycarbonyl)-1-methyl-1*H*-pyrazol-3-yl]piperidine-1-carboxylate (6i) and *tert*-butyl 4-[4-(methoxycarbonyl)-1-methyl-1*H*-pyrazol-5-yl]piperidine-1-carboxylate (5i). HRMS (ESI-TOF).

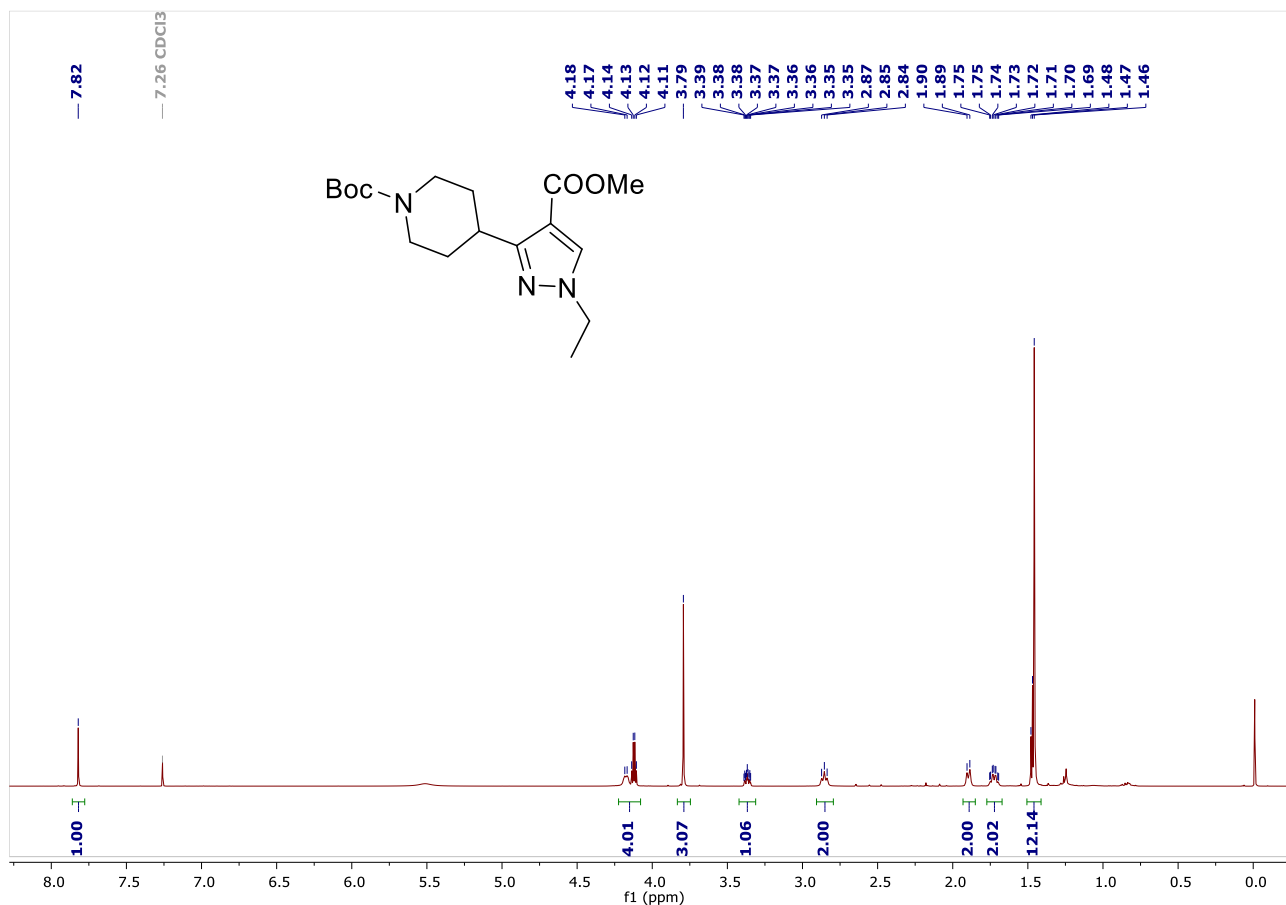

Figure S73. *tert*-Butyl 4-[1-ethyl-4-(methoxycarbonyl)-1*H*-pyrazol-3-yl]piperidine-1-carboxylate (8). <sup>1</sup>H NMR spectrum (700 MHz, CDCl<sub>3</sub>).

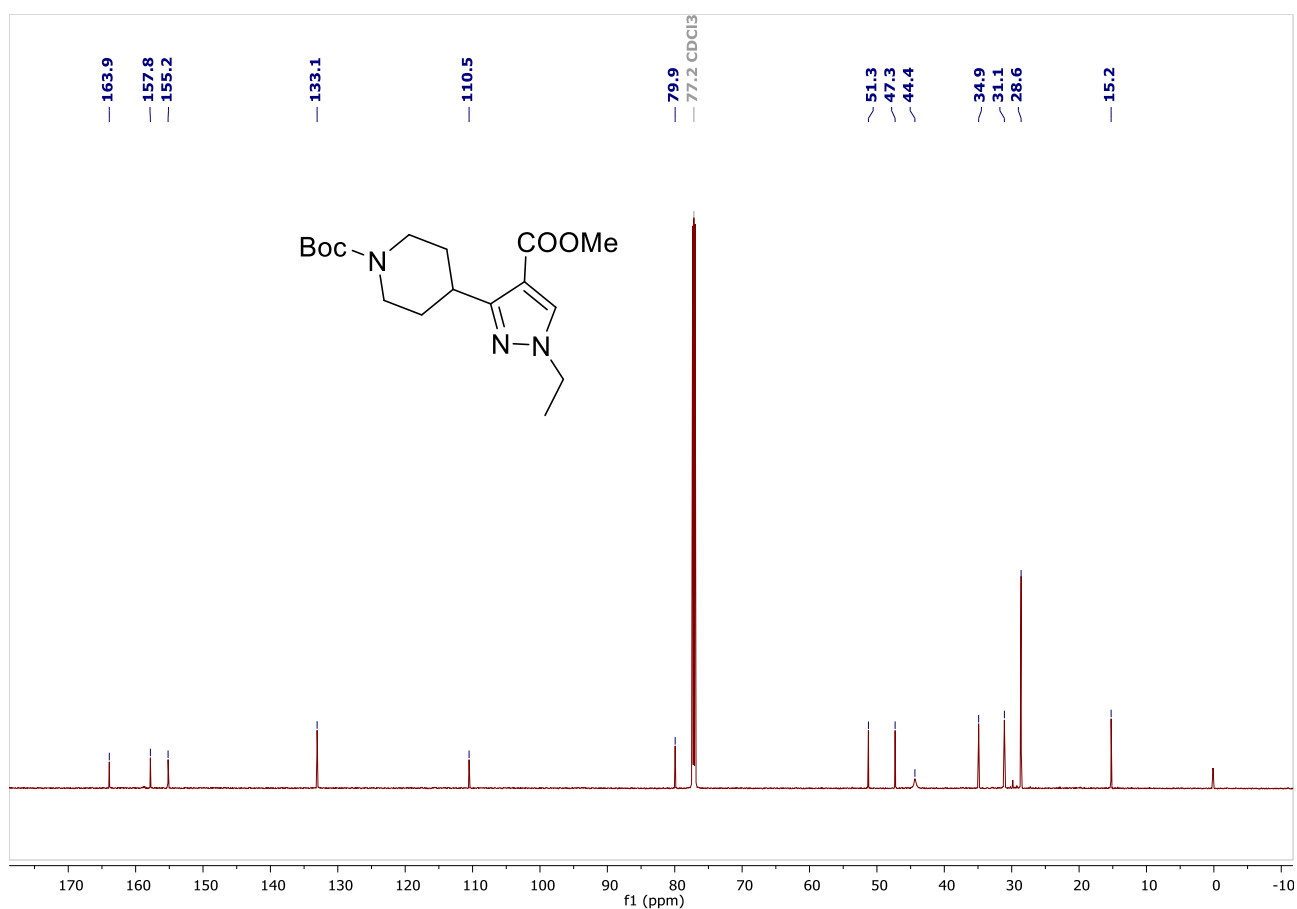

Figure S74. *tert*-Butyl 4-[1-ethyl-4-(methoxycarbonyl)-1*H*-pyrazol-3-yl]piperidine-1-carboxylate (8). <sup>13</sup>C NMR spectrum (176 MHz, CDCl<sub>3</sub>).

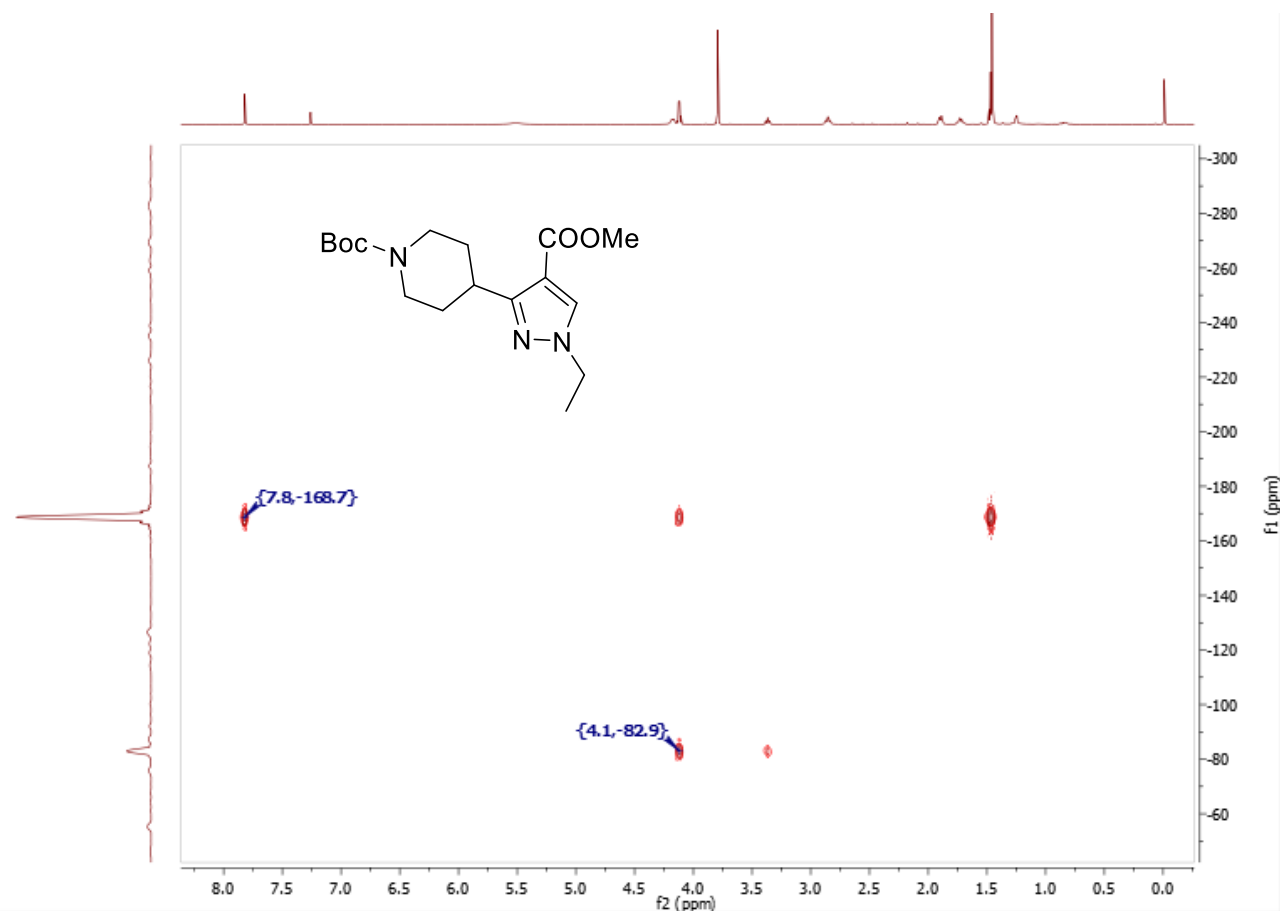

**Figure S75.** *tert*-Butyl 4-[1-ethyl-4-(methoxycarbonyl)-1*H*-pyrazol-3-yl]piperidine-1-carboxylate (8).  $^1\text{H}$ - $^{15}\text{N}$  HMBC spectrum (71 MHz,  $\text{CDCl}_3$ ).



# Compound Spectrum SmartFormula Report

## Analysis Info

Analysis Name D:\Data\GMP-019.d  
Method DirectInfusion\_TuneLow\_pos.m  
Sample Name GMP-019  
Comment SB

Acquisition Date 11/27/2018 2:44:43 PM

Operator hplc  
Instrument micrOTOF-Q III 8228888.20448

## Acquisition Parameter

|             |            |                       |           |                  |           |
|-------------|------------|-----------------------|-----------|------------------|-----------|
| Source Type | ESI        | Ion Polarity          | Positive  | Set Nebulizer    | 0.4 Bar   |
| Focus       | Not active | Set Capillary         | 4500 V    | Set Dry Heater   | 180 °C    |
| Scan Begin  | 50 m/z     | Set End Plate Offset  | -500 V    | Set Dry Gas      | 4.0 l/min |
| Scan End    | 1000 m/z   | Set Collision Cell RF | 140.0 Vpp | Set Divert Valve | Waste     |

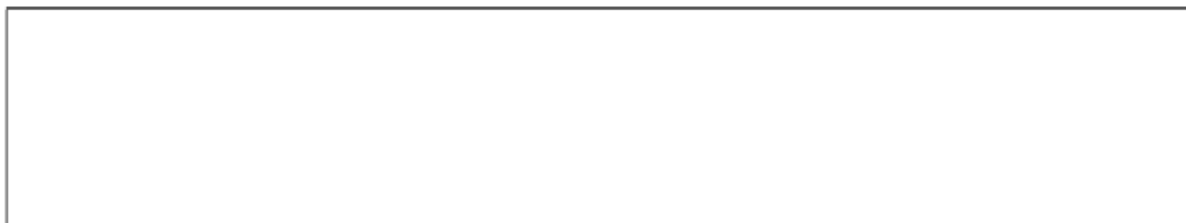

| #    | RT [min] | Area | Int. Type       | I    | S/N  | Chromatogram | Max. m/z | FWHM [min] |
|------|----------|------|-----------------|------|------|--------------|----------|------------|
| n.a. | 0.3      | n.a. | Single spectrum | n.a. | n.a. | n.a.         | 304.2634 | n.a.       |
| n.a. | 3.4      | n.a. | Single spectrum | n.a. | n.a. | n.a.         | 360.1894 | n.a.       |

## +MS, 3.4min #206

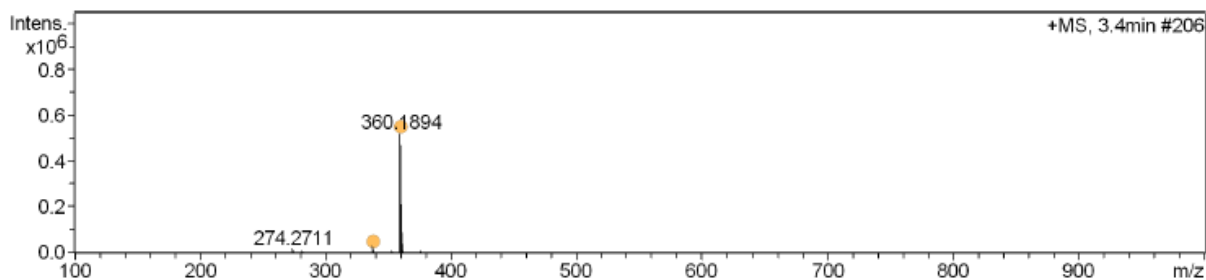

| Meas. m/z | # | Ion Formula  | m/z      | err [ppm] | mSigma | # Sigma | Score  | rdB | e <sup>-</sup> Conf | N-Rule |
|-----------|---|--------------|----------|-----------|--------|---------|--------|-----|---------------------|--------|
| 338.2064  | 1 | C17H28N3O4   | 338.2074 | -3.1      | 16.8   | 1       | 100.00 | 5.5 | even                | ok     |
| 360.1894  | 1 | C17H27N3NaO4 | 360.1894 | -0.1      | 3.5    | 1       | 100.00 | 5.5 | even                | ok     |

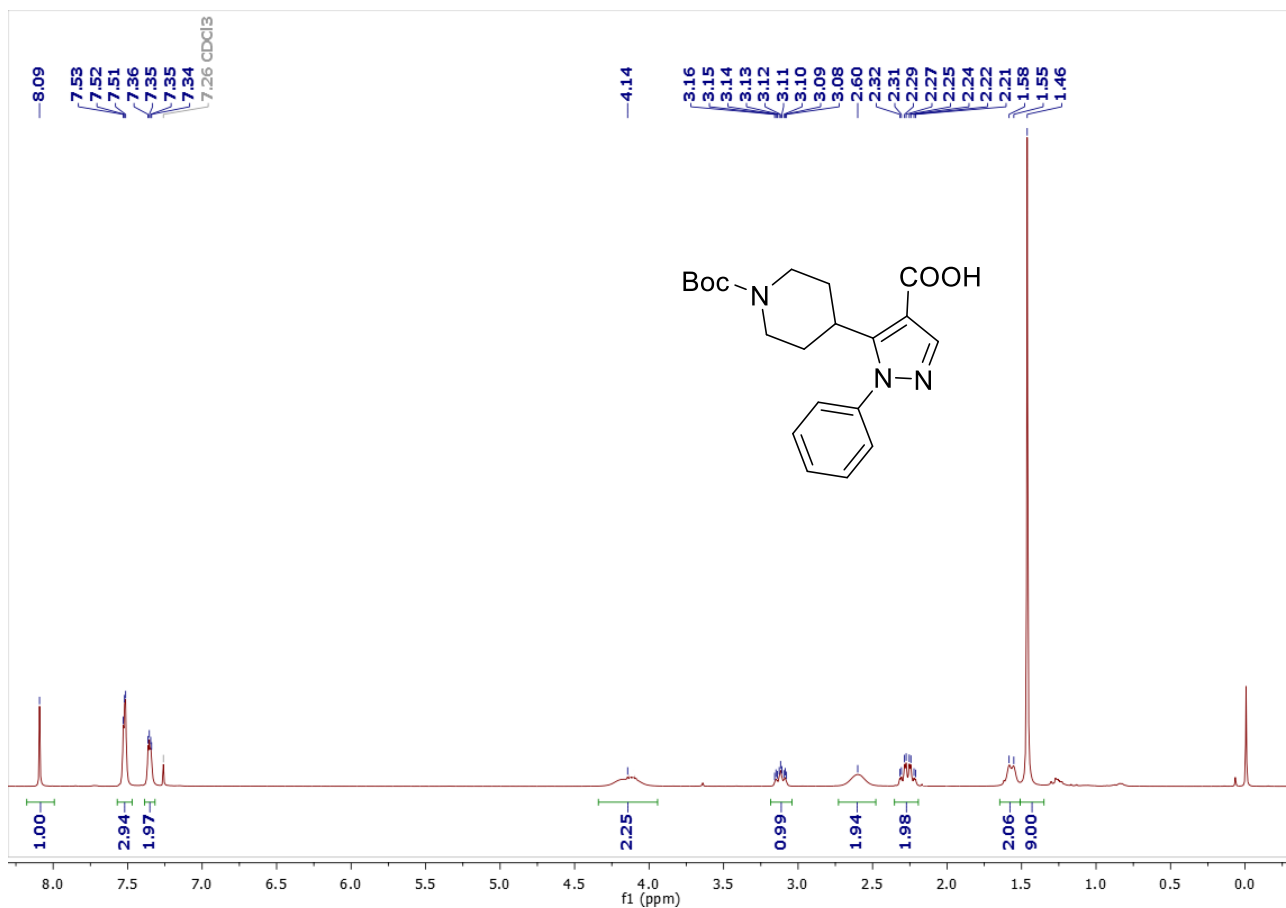

Figure S77. 5-[1-(*tert*-Butoxycarbonyl)piperidin-4-yl]-1-phenyl-1*H*-pyrazole-4-carboxylic acid (9a). <sup>1</sup>H NMR spectrum (400 MHz, CDCl<sub>3</sub>).

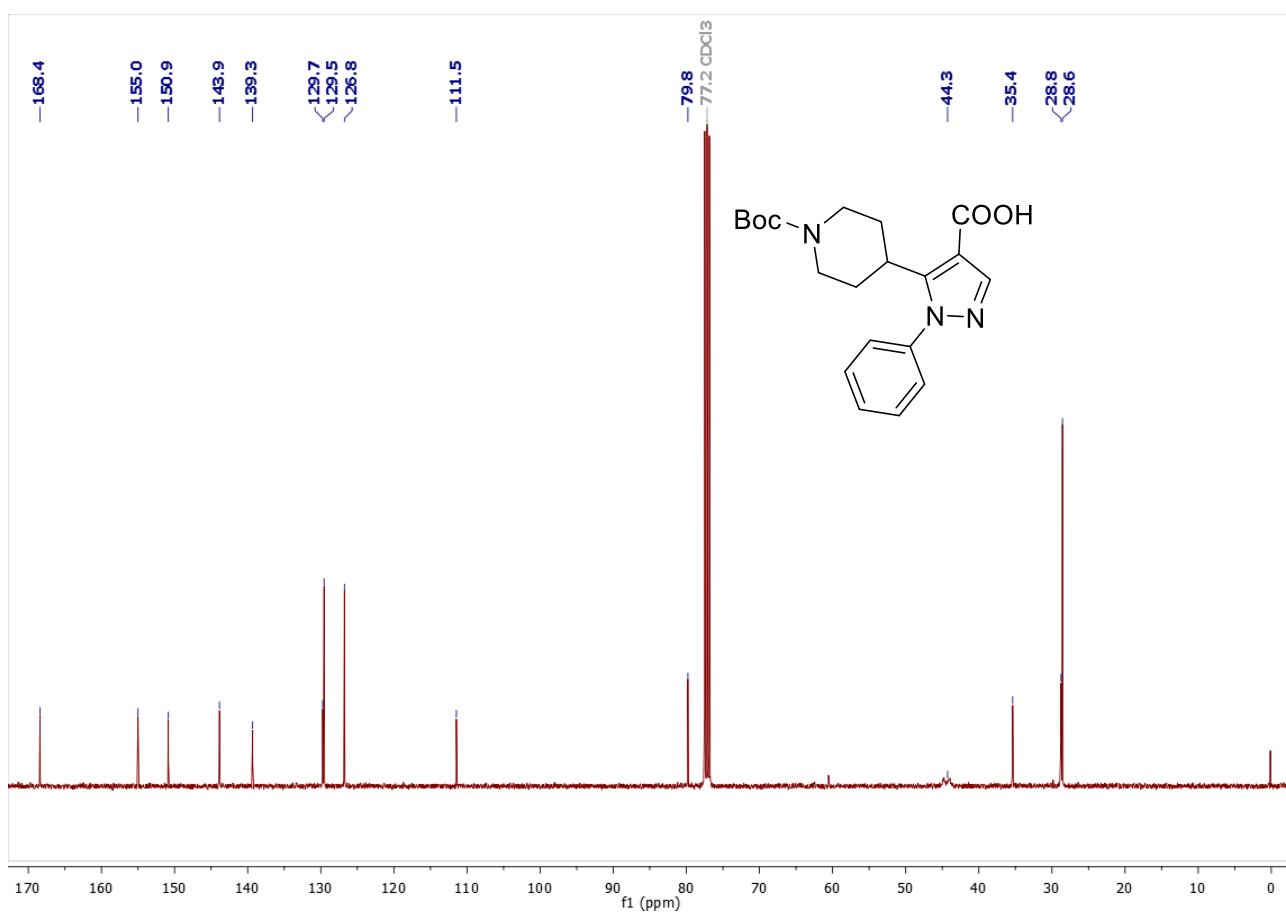

Figure S78. 5-[1-(*tert*-Butoxycarbonyl)piperidin-4-yl]-1-phenyl-1*H*-pyrazole-4-carboxylic acid (9a). <sup>13</sup>C NMR spectrum (101 MHz, CDCl<sub>3</sub>).

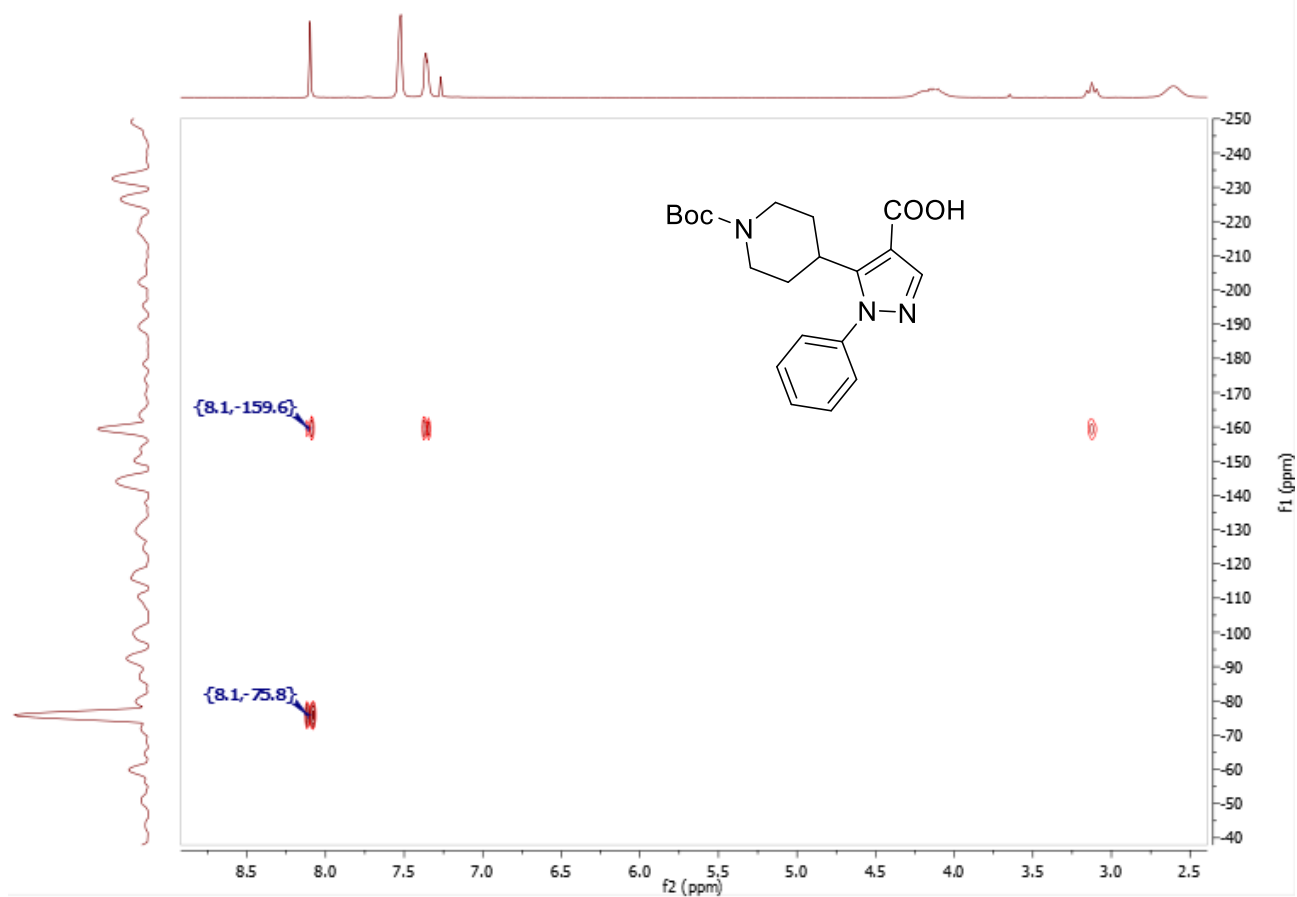

**Figure S79.** 5-[1-(*tert*-Butoxycarbonyl)piperidin-4-yl]-1-phenyl-1*H*-pyrazole-4-carboxylic acid (9a).  $^1\text{H}$ - $^{15}\text{N}$  HMBC spectrum (41 MHz,  $\text{CDCl}_3$ ).

# Compound Spectrum SmartFormula Report

## Analysis Info

Analysis Name D:\Data\GMP-121.d  
 Method DirectInfusion\_TuneLow\_pos.m  
 Sample Name GMP-121  
 Comment AB

Acquisition Date 2/4/2021 9:41:19 PM  
 Operator hplc  
 Instrument microTOF-Q III 8228888.20448

## Acquisition Parameter

|             |            |                       |           |                  |           |
|-------------|------------|-----------------------|-----------|------------------|-----------|
| Source Type | ESI        | Ion Polarity          | Positive  | Set Nebulizer    | 0.4 Bar   |
| Focus       | Not active | Set Capillary         | 4500 V    | Set Dry Heater   | 180 °C    |
| Scan Begin  | 50 m/z     | Set End Plate Offset  | -500 V    | Set Dry Gas      | 4.0 l/min |
| Scan End    | 1000 m/z   | Set Collision Cell RF | 140.0 Vpp | Set Divert Valve | Waste     |

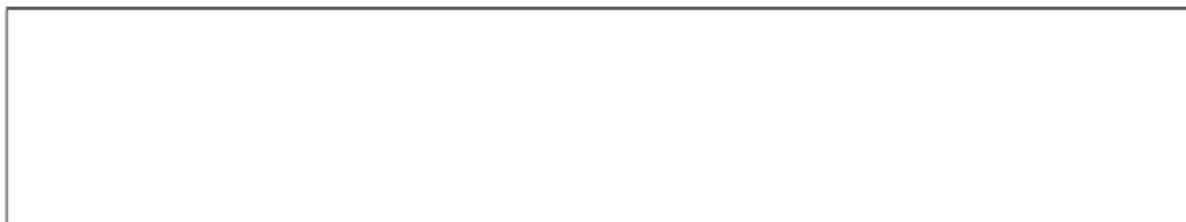

| #    | RT [min] | Area | Int. Type       | I    | S/N  | Chromatogram | Max. m/z | FWHM [min] |
|------|----------|------|-----------------|------|------|--------------|----------|------------|
| n.a. | 3.0      | n.a. | Single spectrum | n.a. | n.a. | n.a.         | 394.1738 | n.a.       |

## +MS, 3.0min #180

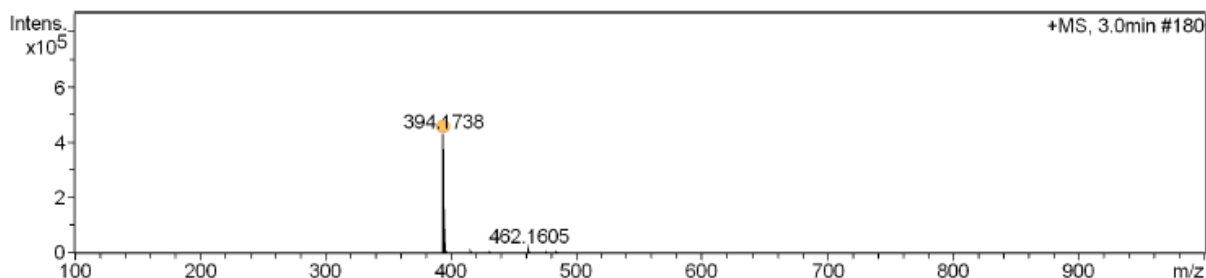

| Meas. m/z | # | Ion Formula  | m/z      | err [ppm] | mSigma | # Sigma | Score  | rdB | e <sup>-</sup> Conf | N-Rule |
|-----------|---|--------------|----------|-----------|--------|---------|--------|-----|---------------------|--------|
| 394.1738  | 1 | C20H25N3NaO4 | 394.1737 | -0.2      | 1.2    | 1       | 100.00 | 9.5 | even                | ok     |

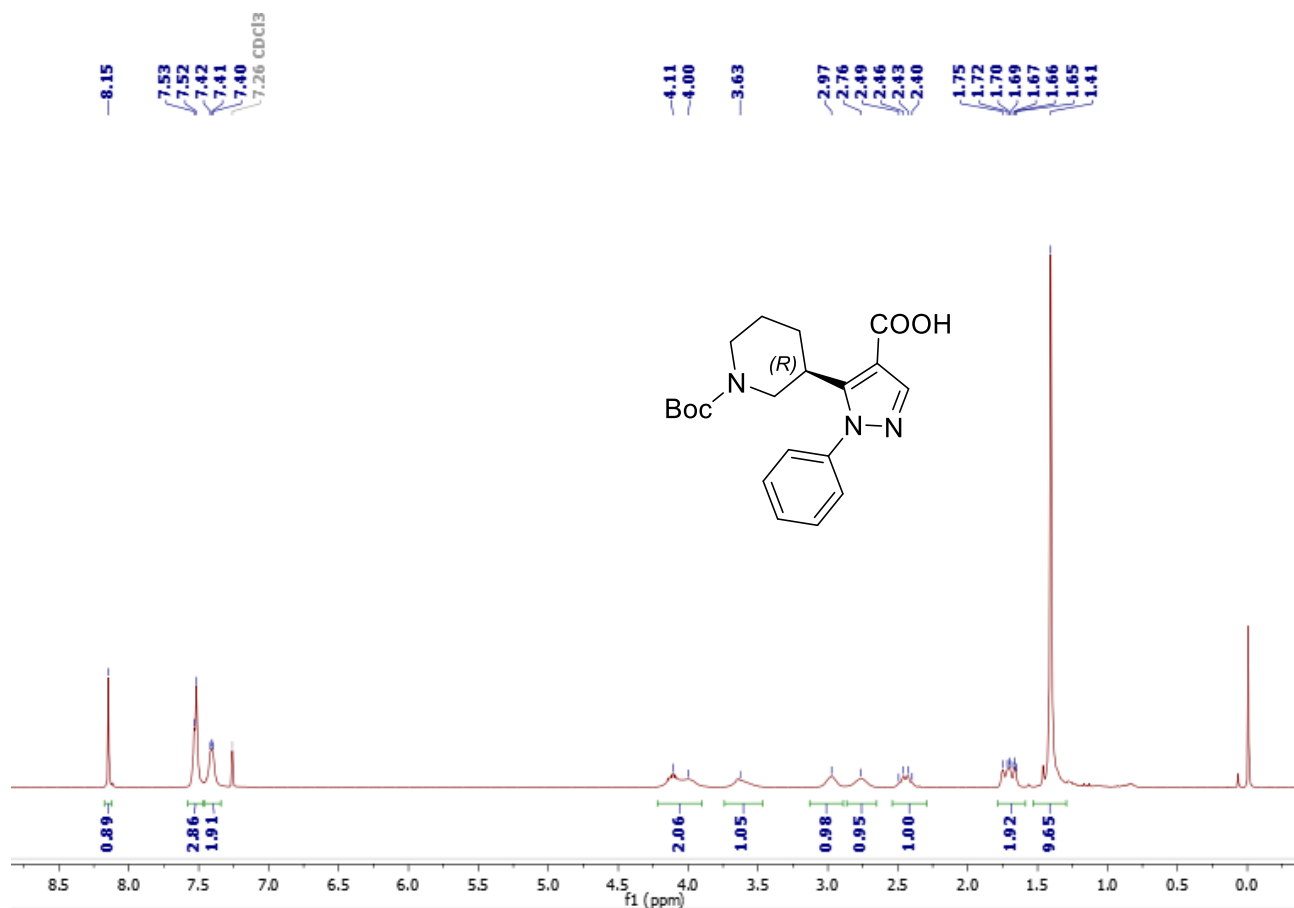

Figure S81. 5-[(3*R*)-1-(*tert*-Butoxycarbonyl)piperidin-3-yl]-1-phenyl-1*H*-pyrazole-4-carboxylic acid (9b). <sup>1</sup>H NMR spectrum (400 MHz, CDCl<sub>3</sub>).

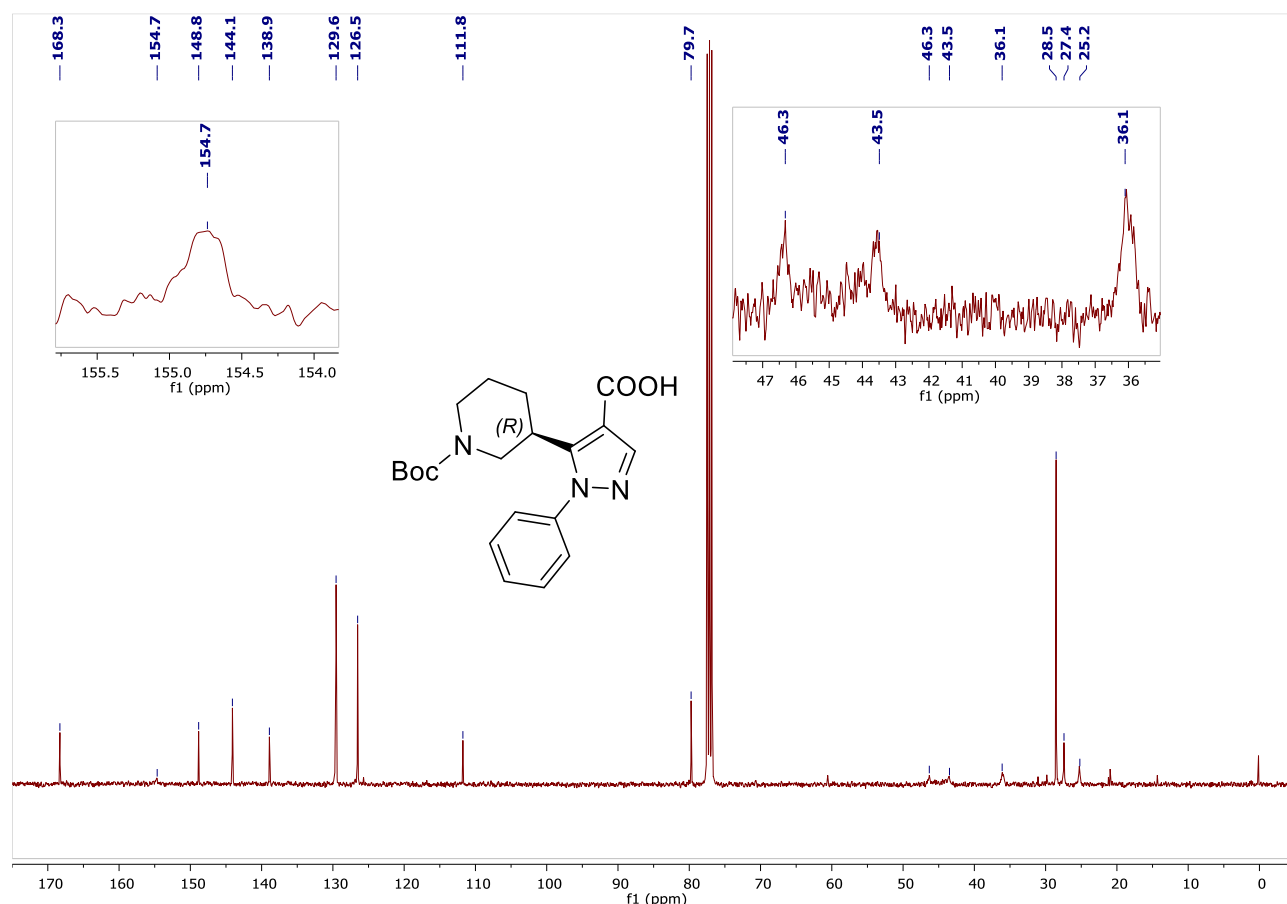

Figure S82. 5-[(3*R*)-1-(*tert*-Butoxycarbonyl)piperidin-3-yl]-1-phenyl-1*H*-pyrazole-4-carboxylic acid (9b). <sup>13</sup>C NMR spectrum (101 MHz, CDCl<sub>3</sub>).

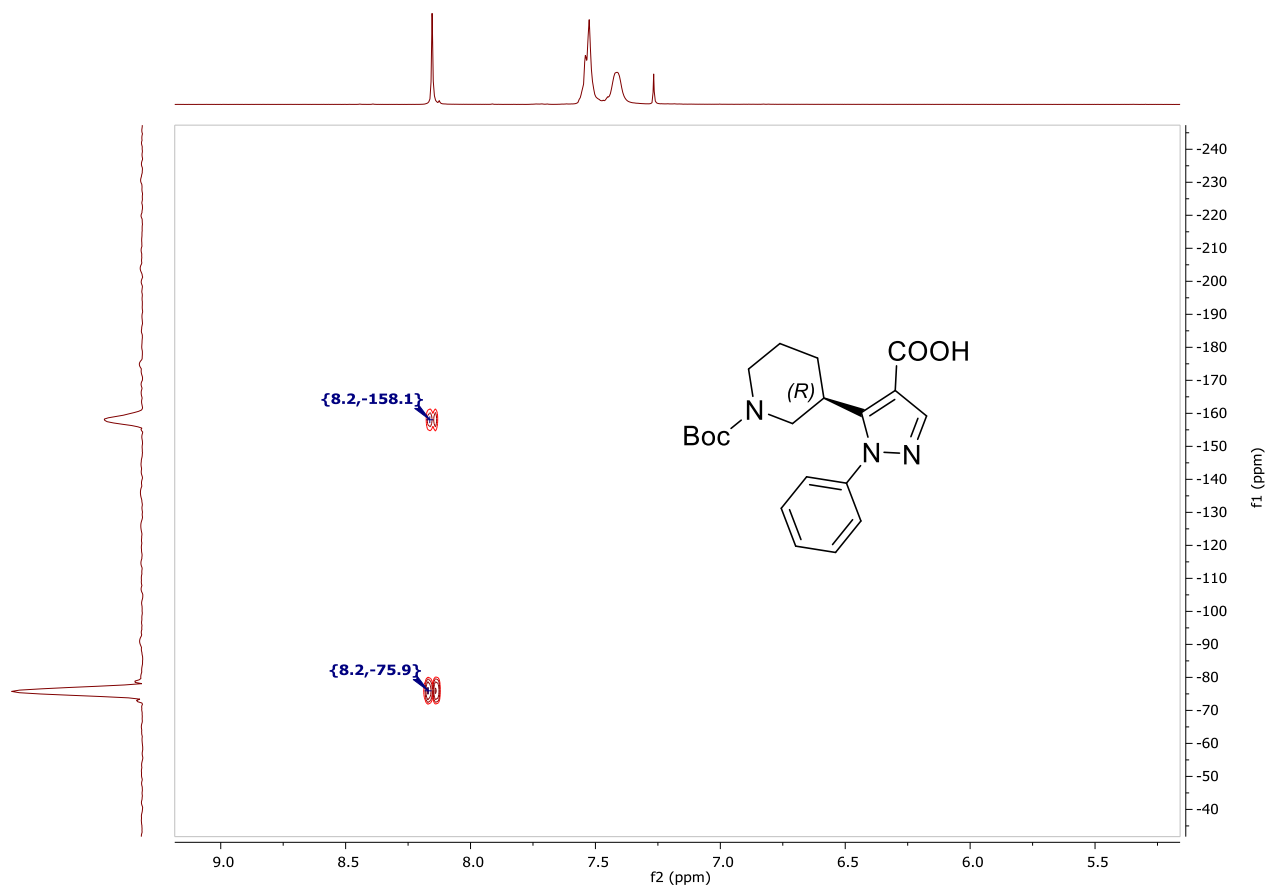

**Figure S83.** 5-[(3R)-1-(*tert*-Butoxycarbonyl)piperidin-3-yl]-1-phenyl-1*H*-pyrazole-4-carboxylic acid (9b).  $^1\text{H}$ - $^{15}\text{N}$  HMBC spectrum (41 MHz,  $\text{CDCl}_3$ ).

## Compound Spectrum SmartFormula Report

### Analysis Info

Analysis Name D:\Data\GMP-124.d  
Method DirectInfusion\_TuneLow\_pos.m  
Sample Name GMP-124  
Comment AB

Acquisition Date 2/4/2021 9:18:32 PM

Operator hplc  
Instrument micrOTOF-Q III 8228888.20448

### Acquisition Parameter

|             |            |                       |           |                  |           |
|-------------|------------|-----------------------|-----------|------------------|-----------|
| Source Type | ESI        | Ion Polarity          | Positive  | Set Nebulizer    | 0.4 Bar   |
| Focus       | Not active | Set Capillary         | 4500 V    | Set Dry Heater   | 180 °C    |
| Scan Begin  | 50 m/z     | Set End Plate Offset  | -500 V    | Set Dry Gas      | 4.0 l/min |
| Scan End    | 1000 m/z   | Set Collision Cell RF | 140.0 Vpp | Set Divert Valve | Waste     |

| #    | RT [min] | Area | Int. Type       | I    | S/N  | Chromatogram | Max. m/z | FWHM [min] |
|------|----------|------|-----------------|------|------|--------------|----------|------------|
| n.a. | 4.0      | n.a. | Single spectrum | n.a. | n.a. | n.a.         | 394.1738 | n.a.       |

### +MS, 4.0min #238

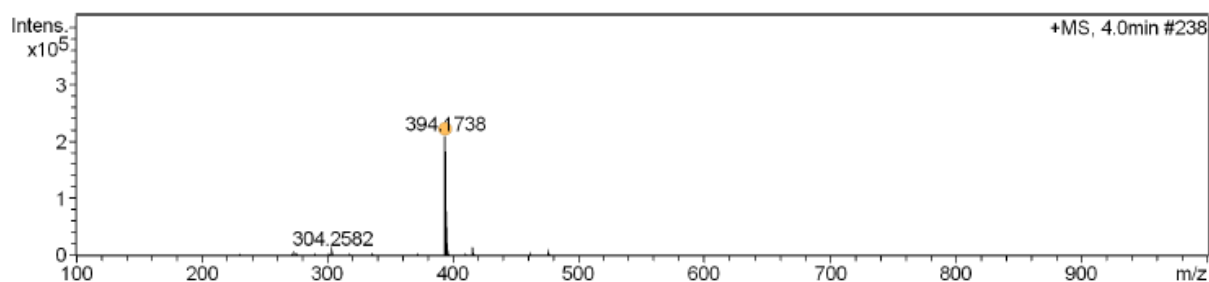

| Meas. m/z | # | Ion Formula  | m/z      | err [ppm] | mSigma | # Sigma | Score  | rdb | e <sup>-</sup> Conf | N-Rule |
|-----------|---|--------------|----------|-----------|--------|---------|--------|-----|---------------------|--------|
| 394.1738  | 1 | C20H25N3NaO4 | 394.1737 | 0.1       | 21.6   | 3       | 100.00 | 9.5 | even                | ok     |

**Figure S84.** 5-[(3*R*)-1-(*tert*-Butoxycarbonyl)piperidin-3-yl]-1-phenyl-1*H*-pyrazole-4-carboxylic acid (9b). HRMS (ESI-TOF).

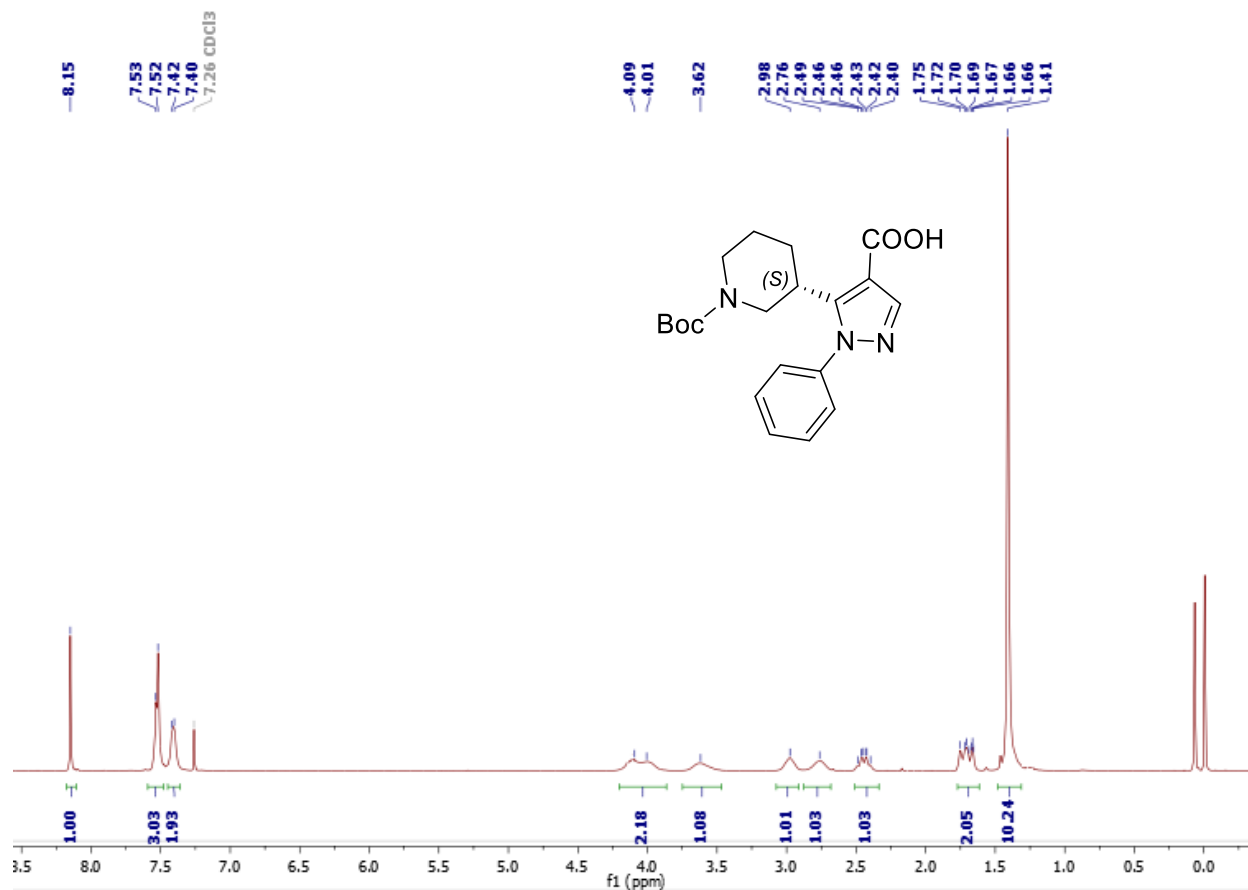

Figure S85. 5-[(3*S*)-1-(*tert*-Butoxycarbonyl)piperidin-3-yl]-1-phenyl-1*H*-pyrazole-4-carboxylic acid (9c). <sup>1</sup>H NMR spectrum (400 MHz, CDCl<sub>3</sub>).

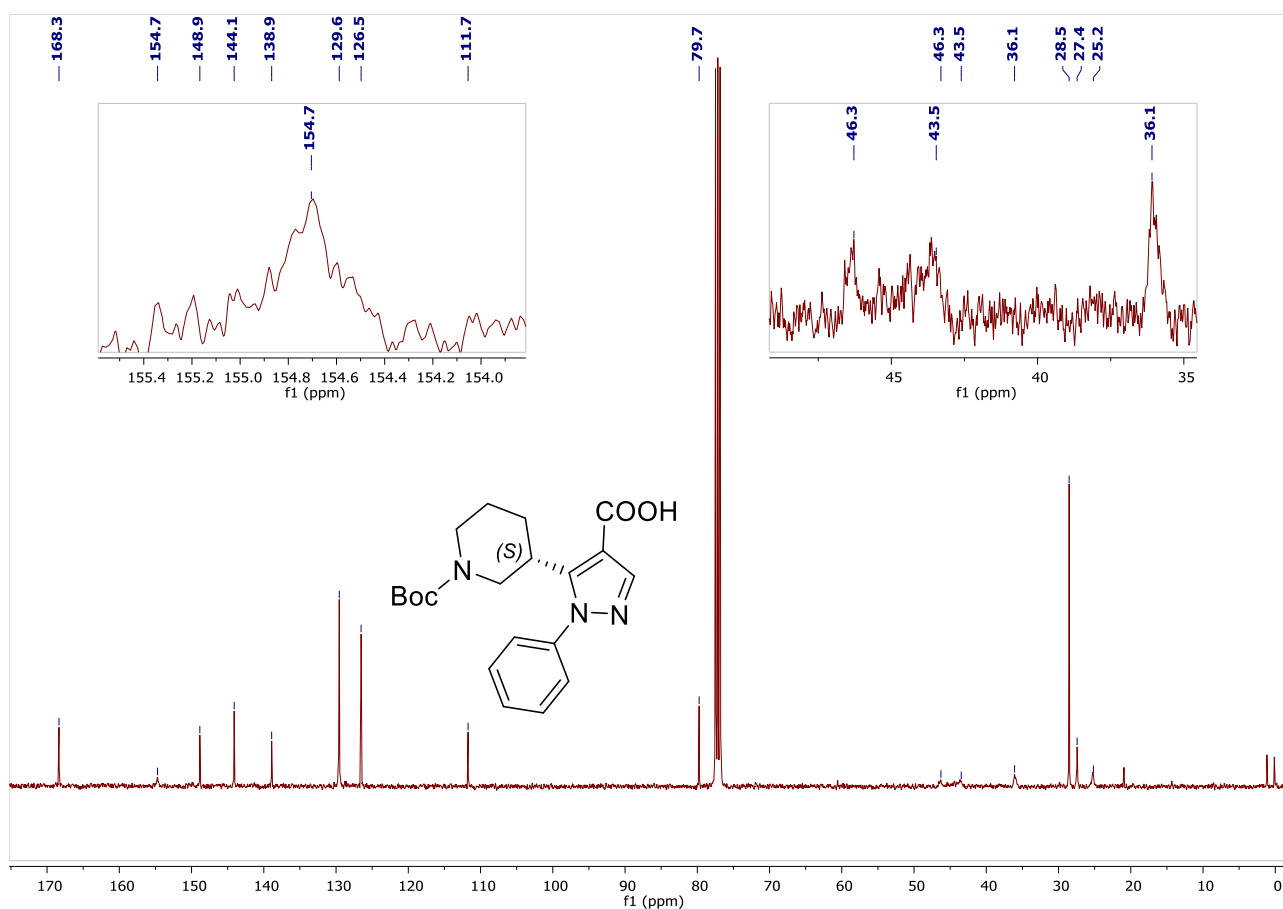

Figure S86. 5-[(3*S*)-1-(*tert*-Butoxycarbonyl)piperidin-3-yl]-1-phenyl-1*H*-pyrazole-4-carboxylic acid (9c). <sup>13</sup>C NMR spectrum (101 MHz, CDCl<sub>3</sub>).



## Compound Spectrum SmartFormula Report

### Analysis Info

Analysis Name D:\Data\GMP-152.d  
Method DirectInfusion\_TuneLow\_pos.m  
Sample Name GMP-152  
Comment AB

Acquisition Date 2/4/2021 2:07:00 PM

Operator hplc  
Instrument micrOTOF-Q III 8228888.20448

### Acquisition Parameter

|             |            |                       |           |                  |           |
|-------------|------------|-----------------------|-----------|------------------|-----------|
| Source Type | ESI        | Ion Polarity          | Positive  | Set Nebulizer    | 0.4 Bar   |
| Focus       | Not active | Set Capillary         | 4500 V    | Set Dry Heater   | 180 °C    |
| Scan Begin  | 50 m/z     | Set End Plate Offset  | -500 V    | Set Dry Gas      | 4.0 l/min |
| Scan End    | 1000 m/z   | Set Collision Cell RF | 140.0 Vpp | Set Divert Valve | Waste     |

| #    | RT [min] | Area | Int. Type       | I    | S/N  | Chromatogram | Max. m/z | FWHM [min] |
|------|----------|------|-----------------|------|------|--------------|----------|------------|
| n.a. | 8.2      | n.a. | Single spectrum | n.a. | n.a. | n.a.         | 394.1739 | n.a.       |

### +MS, 8.2min #491

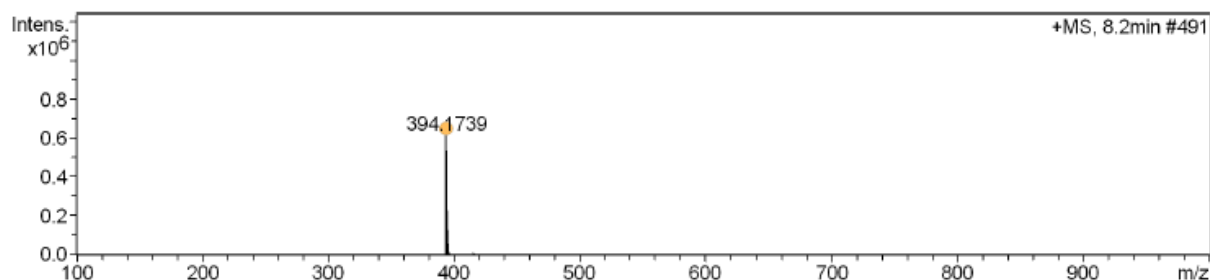

| Meas. m/z | # | Ion Formula  | m/z      | err [ppm] | mSigma | # Sigma | Score  | rdb | e <sup>-</sup> Conf | N-Rule |
|-----------|---|--------------|----------|-----------|--------|---------|--------|-----|---------------------|--------|
| 394.1739  | 1 | C20H25N3NaO4 | 394.1737 | -0.3      | 7.5    | 1       | 100.00 | 9.5 | even                | ok     |

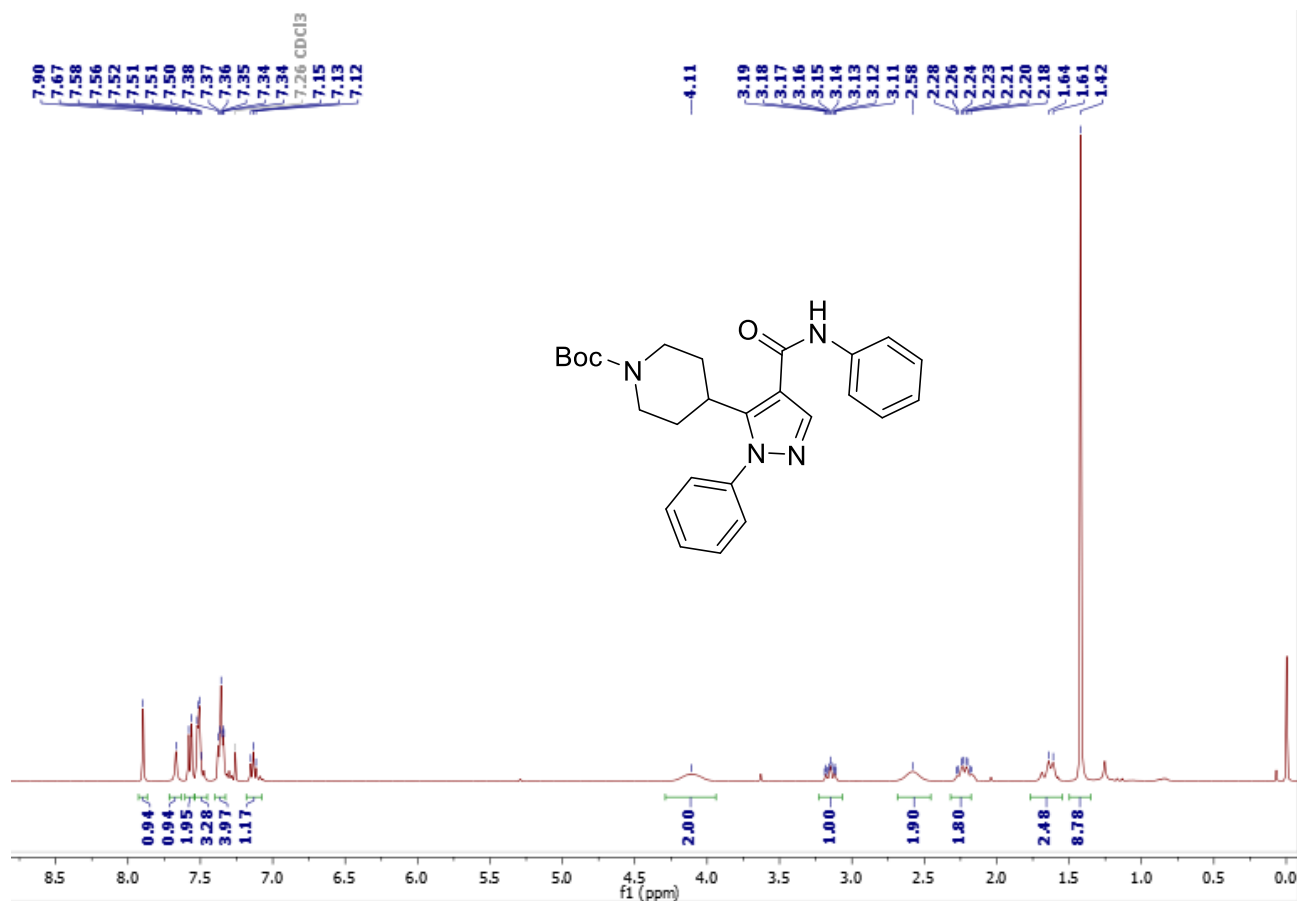

Figure S88. *tert*-Butyl 4-[1-phenyl-4-(phenylcarbamoyl)-1*H*-pyrazol-5-yl]piperidine-1-carboxylate (10a). <sup>1</sup>H NMR spectrum (400 MHz, CDCl<sub>3</sub>).

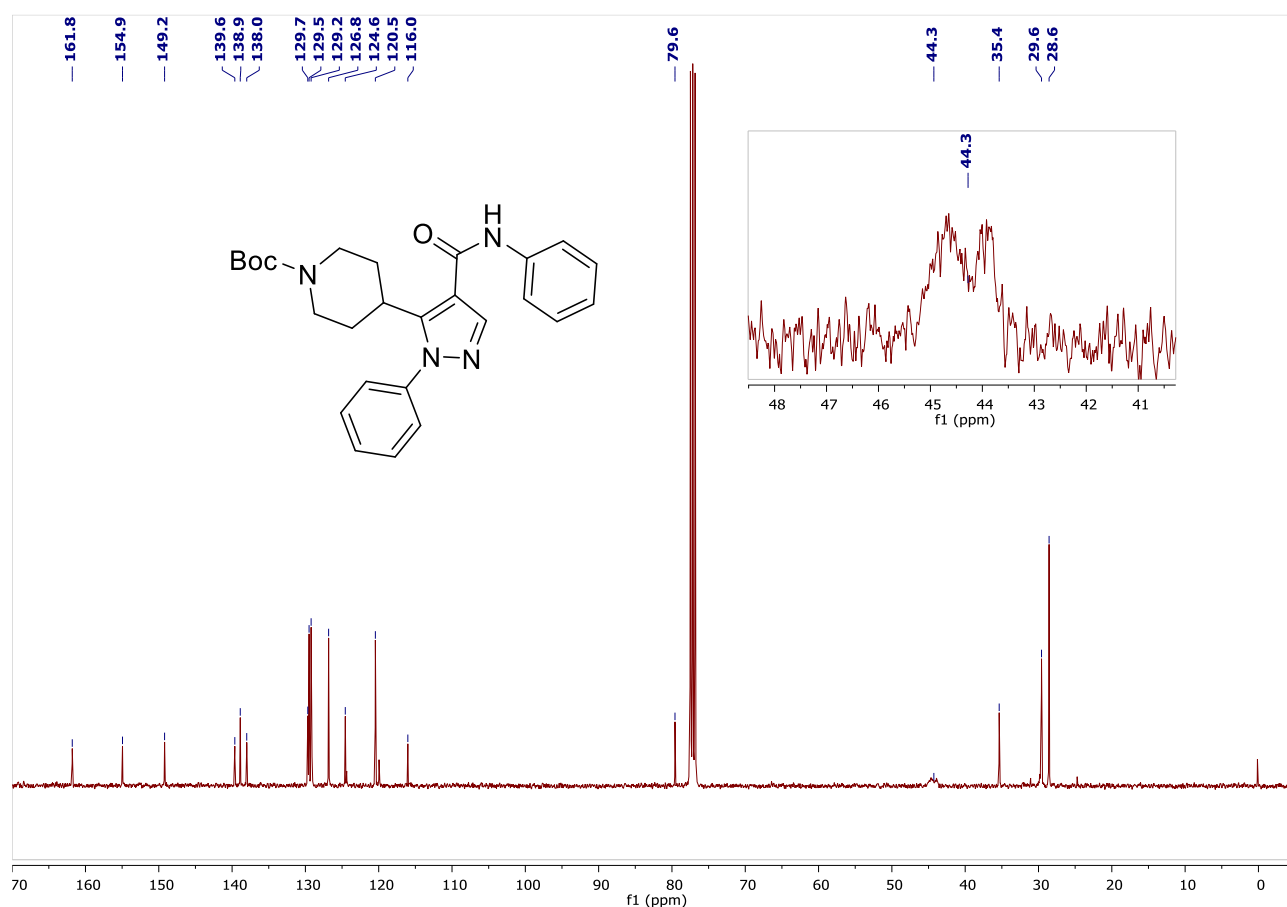

Figure S89. *tert*-Butyl 4-[1-phenyl-4-(phenylcarbamoyl)-1*H*-pyrazol-5-yl]piperidine-1-carboxylate (10a). <sup>13</sup>C NMR spectrum (101 MHz, CDCl<sub>3</sub>).

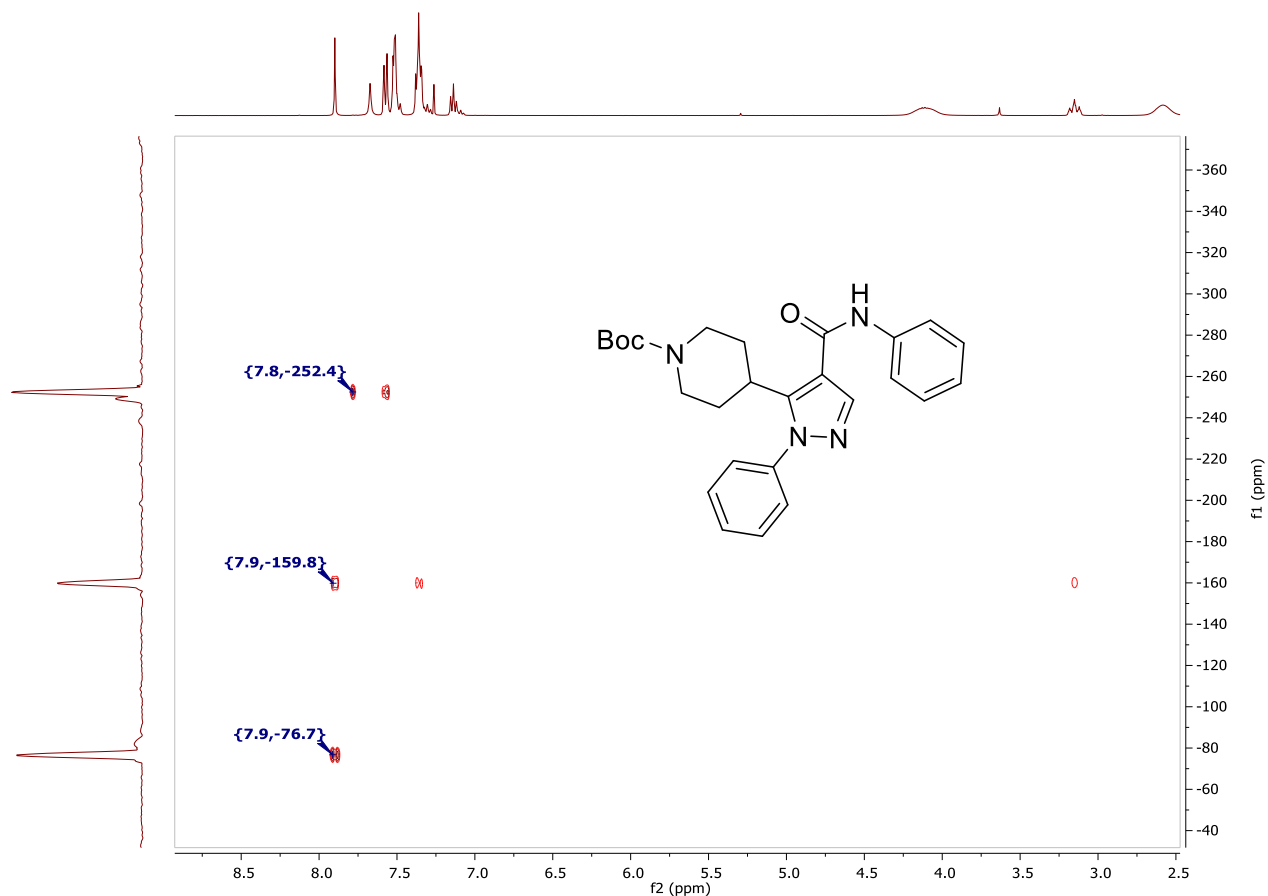

**Figure S90.** *tert*-Butyl 4-[1-phenyl-4-(phenylcarbamoyl)-1*H*-pyrazol-5-yl]piperidine-1-carboxylate (10a). <sup>1</sup>H-<sup>15</sup>N HMBC spectrum (41 MHz, CDCl<sub>3</sub>).

# Compound Spectrum SmartFormula Report

## Analysis Info

Analysis Name D:\Data\GMP-126.d  
Method DirectInfusion\_TuneLow\_pos.m  
Sample Name GMP-126  
Comment AB

Acquisition Date 2/4/2021 9:31:08 PM

Operator hplc  
Instrument micrOTOF-Q III 8228888.20448

## Acquisition Parameter

|             |            |                       |           |                  |           |
|-------------|------------|-----------------------|-----------|------------------|-----------|
| Source Type | ESI        | Ion Polarity          | Positive  | Set Nebulizer    | 0.4 Bar   |
| Focus       | Not active | Set Capillary         | 4500 V    | Set Dry Heater   | 180 °C    |
| Scan Begin  | 50 m/z     | Set End Plate Offset  | -500 V    | Set Dry Gas      | 4.0 l/min |
| Scan End    | 1000 m/z   | Set Collision Cell RF | 140.0 Vpp | Set Divert Valve | Waste     |

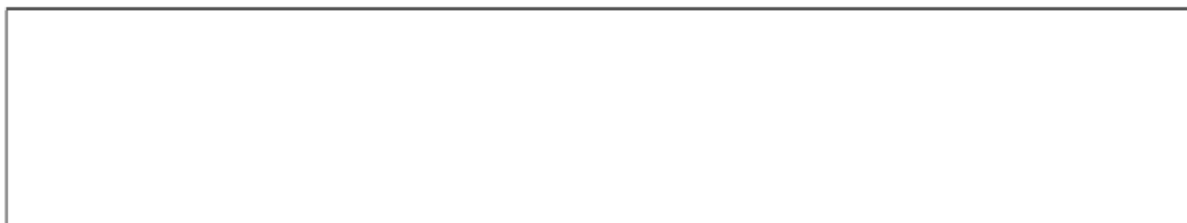

| #    | RT [min] | Area | Int. Type       | I    | S/N  | Chromatogram | Max. m/z | FWHM [min] |
|------|----------|------|-----------------|------|------|--------------|----------|------------|
| n.a. | 2.0      | n.a. | Single spectrum | n.a. | n.a. | n.a.         | 469.2209 | n.a.       |

## +MS, 2.0min #118

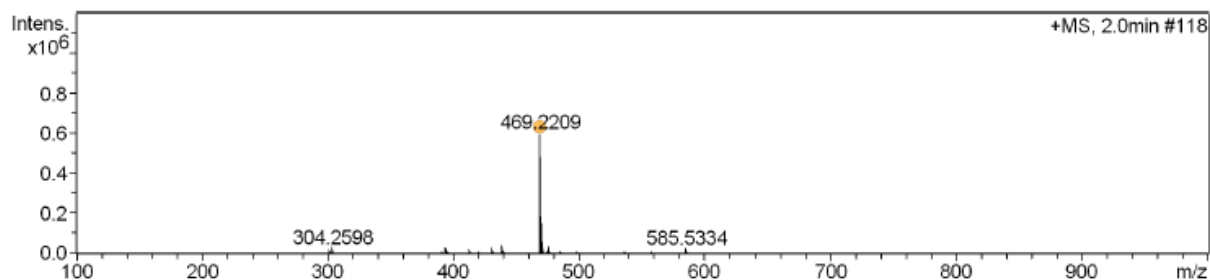

| Meas. m/z | # | Ion Formula                                                     | m/z      | err [ppm] | mSigma | # Sigma | Score  | rdB  | e <sup>-</sup> Conf | N-Rule |
|-----------|---|-----------------------------------------------------------------|----------|-----------|--------|---------|--------|------|---------------------|--------|
| 469.2209  | 1 | C <sub>26</sub> H <sub>30</sub> N <sub>4</sub> NaO <sub>3</sub> | 469.2210 | -0.2      | 3.0    | 1       | 100.00 | 13.5 | even                | ok     |

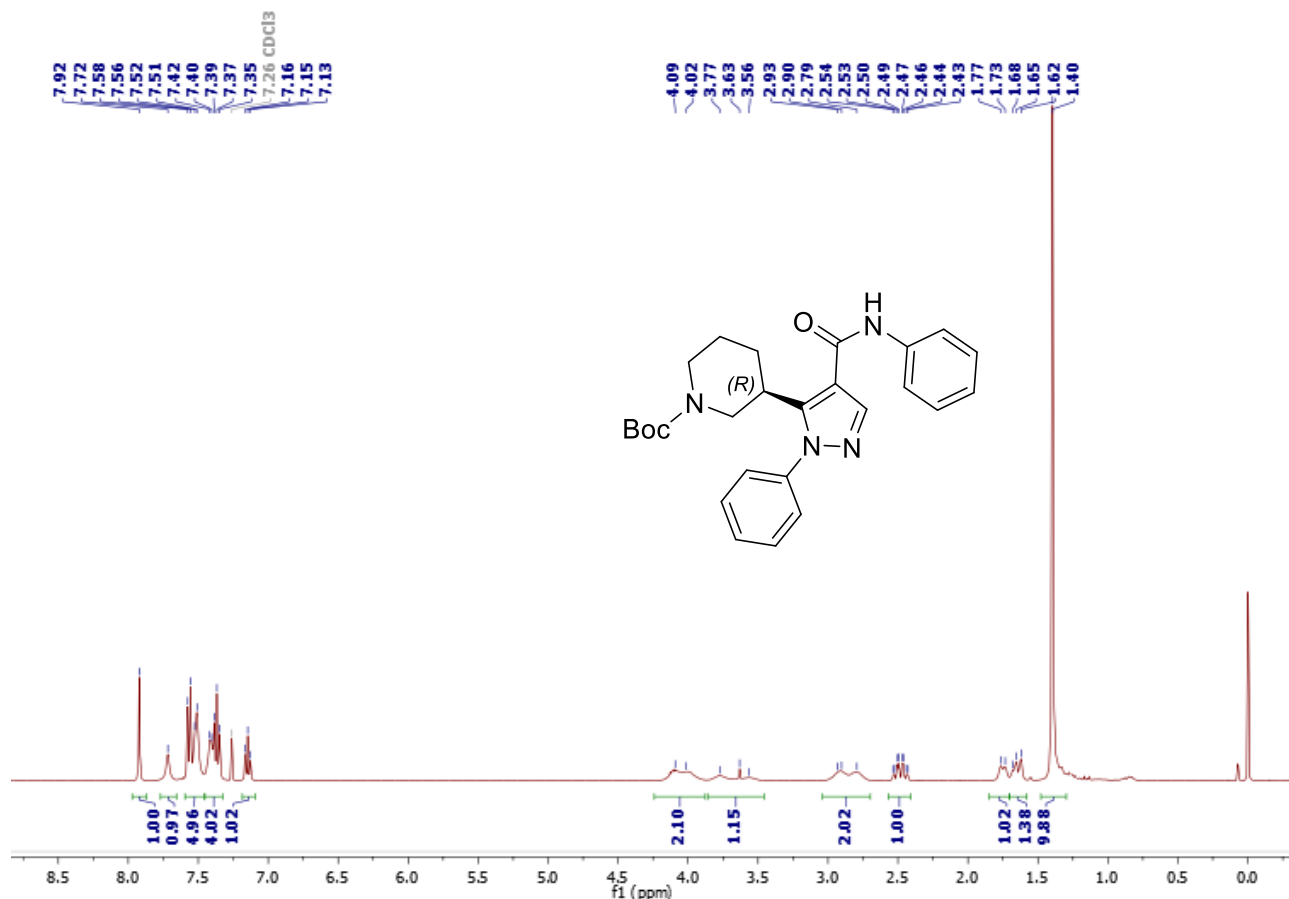

Figure S92. *tert*-Butyl (3*R*)-3-[1-phenyl-4-(phenylcarbamoyl)-1*H*-pyrazol-5-yl]piperidine-1-carboxylate (10b). <sup>1</sup>H NMR spectrum (400 MHz, CDCl<sub>3</sub>).

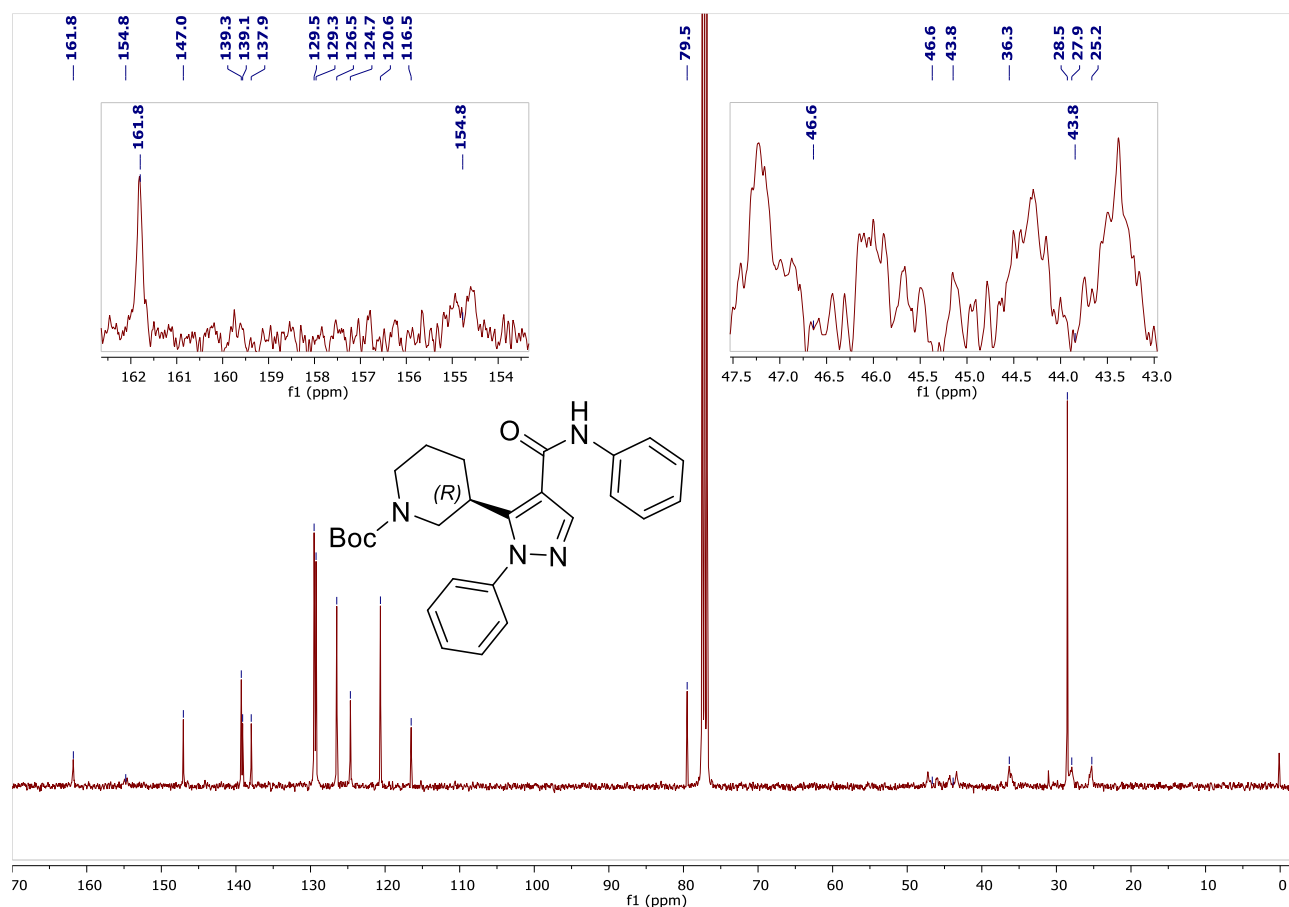

Figure S93. *tert*-Butyl (3*R*)-3-[1-phenyl-4-(phenylcarbamoyl)-1*H*-pyrazol-5-yl]piperidine-1-carboxylate (10b). <sup>13</sup>C NMR spectrum (101 MHz, CDCl<sub>3</sub>).

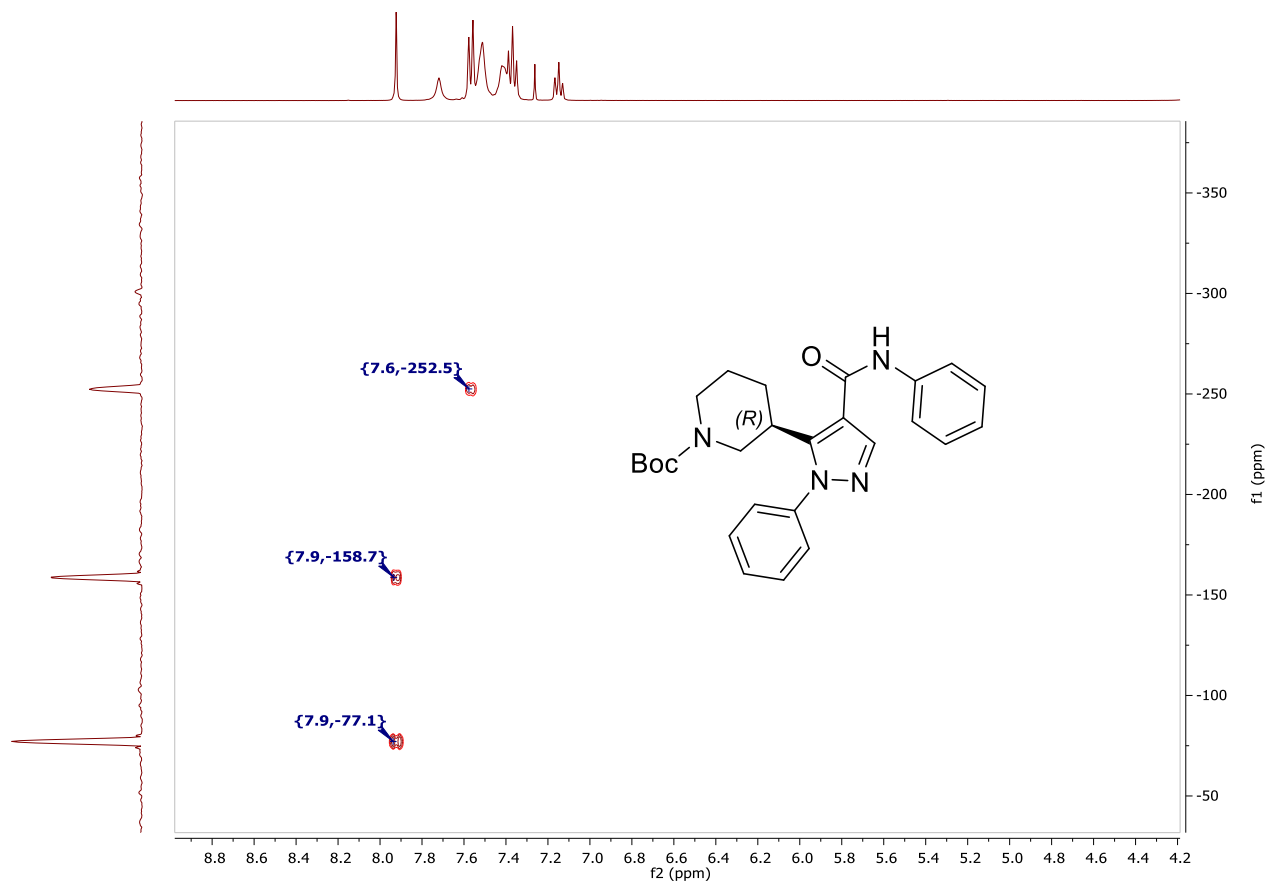

**Figure S94.** *tert*-Butyl (3*R*)-3-[1-phenyl-4-(phenylcarbamoyl)-1*H*-pyrazol-5-yl]piperidine-1-carboxylate (10b).  $^1\text{H}$ - $^{15}\text{N}$  HMBC spectrum (41 MHz,  $\text{CDCl}_3$ ).

# Compound Spectrum SmartFormula Report

## Analysis Info

Analysis Name D:\Data\GMP-129.d  
Method DirectInfusion\_TuneLow\_pos.m  
Sample Name GMP-129  
Comment AB

Acquisition Date 2/4/2021 9:00:51 PM

Operator hplc  
Instrument micrOTOF-Q III 8228888.20448

## Acquisition Parameter

|             |            |                       |           |                  |           |
|-------------|------------|-----------------------|-----------|------------------|-----------|
| Source Type | ESI        | Ion Polarity          | Positive  | Set Nebulizer    | 0.4 Bar   |
| Focus       | Not active | Set Capillary         | 4500 V    | Set Dry Heater   | 180 °C    |
| Scan Begin  | 50 m/z     | Set End Plate Offset  | -500 V    | Set Dry Gas      | 4.0 l/min |
| Scan End    | 1000 m/z   | Set Collision Cell RF | 140.0 Vpp | Set Divert Valve | Waste     |

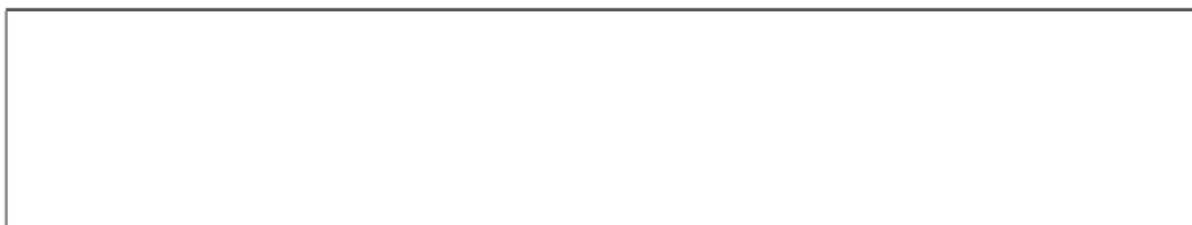

| #    | RT [min] | Area | Int. Type       | I    | S/N  | Chromatogram | Max. m/z | FWHM [min] |
|------|----------|------|-----------------|------|------|--------------|----------|------------|
| n.a. | 3.1      | n.a. | Single spectrum | n.a. | n.a. | n.a.         | 469.2216 | n.a.       |

## +MS, 3.1min #180

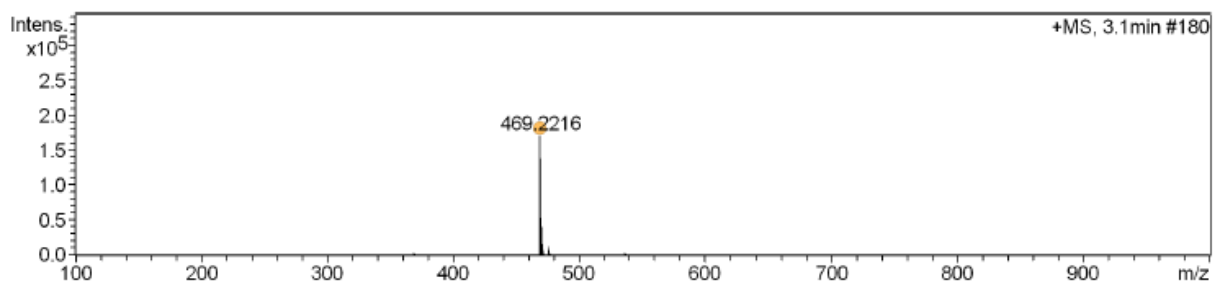

| Meas. m/z | # | Ion Formula  | m/z      | err [ppm] | mSigma | # Sigma | Score  | rdb  | e <sup>-</sup> Conf | N-Rule |
|-----------|---|--------------|----------|-----------|--------|---------|--------|------|---------------------|--------|
| 469.2216  | 1 | C26H30N4NaO3 | 469.2210 | 1.3       | 4.9    | 1       | 100.00 | 13.5 | even                | ok     |

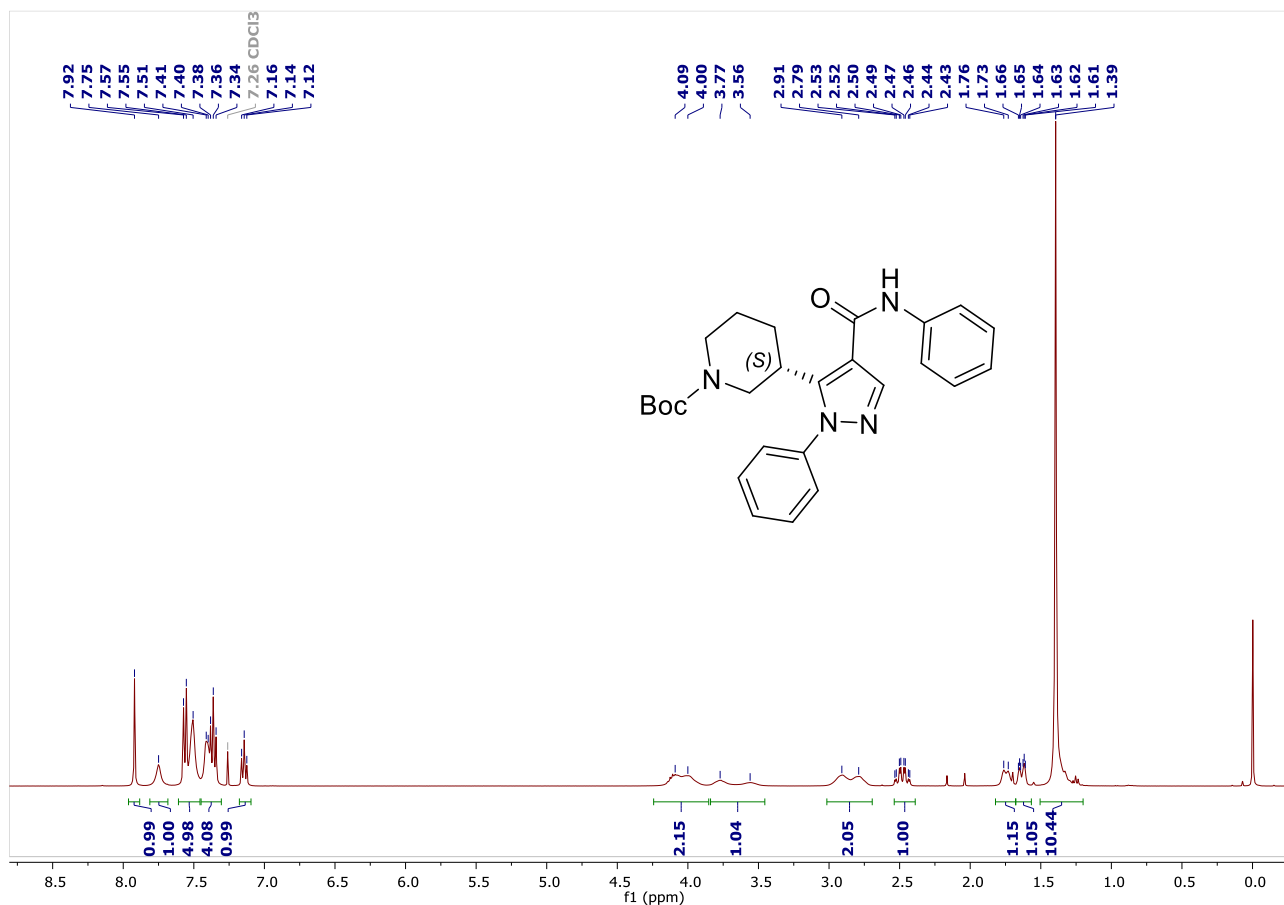

**Figure S96.** *tert*-Butyl (3*S*)-3-[1-phenyl-4-(phenylcarbamoyl)-1*H*-pyrazol-5-yl]piperidine-1-carboxylate (10c). <sup>1</sup>H NMR spectrum (400 MHz, CDCl<sub>3</sub>).

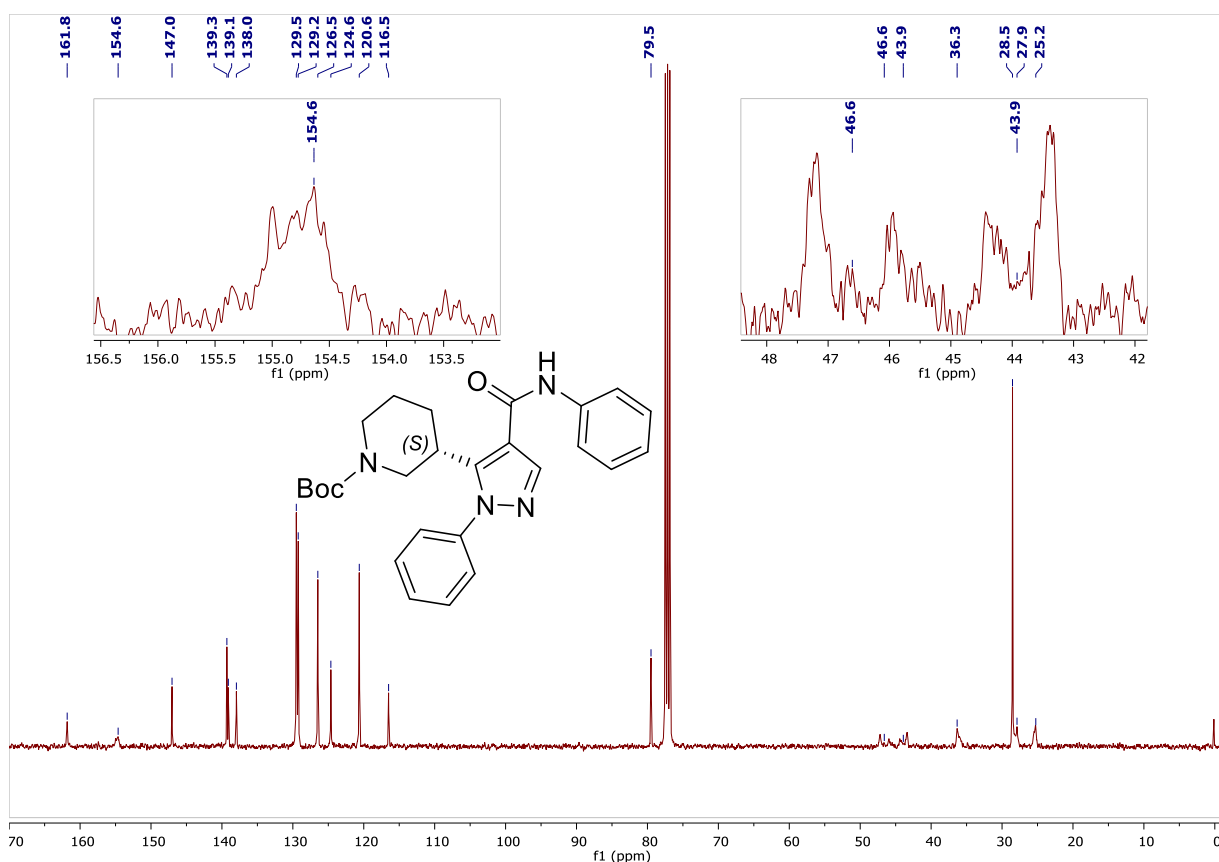

**Figure S97.** *tert*-Butyl (3*S*)-3-[1-phenyl-4-(phenylcarbamoyl)-1*H*-pyrazol-5-yl]piperidine-1-carboxylate (10c). <sup>13</sup>C NMR spectrum (101 MHz, CDCl<sub>3</sub>).



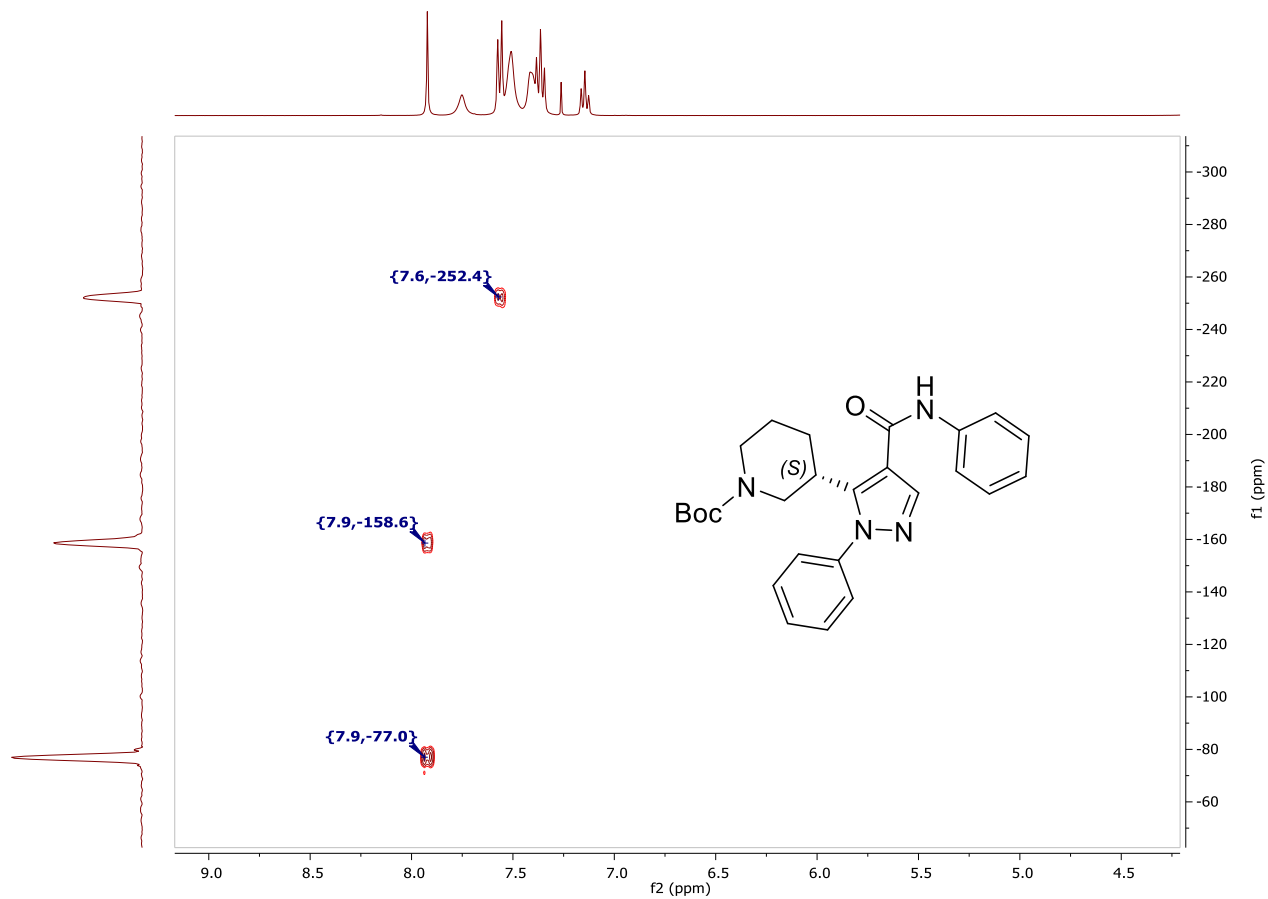

**Figure S98.** *tert*-Butyl (3*S*)-3-[1-phenyl-4-(phenylcarbamoyl)-1*H*-pyrazol-5-yl]piperidine-1-carboxylate (10c).  $^1\text{H}$ - $^{15}\text{N}$  HMBC spectrum (41 MHz,  $\text{CDCl}_3$ ).

## Compound Spectrum SmartFormula Report

### Analysis Info

Analysis Name D:\Data\GMP-155.d  
Method DirectInfusion\_TuneLow\_pos.m  
Sample Name GMP-155  
Comment AB

Acquisition Date 2/4/2021 1:42:18 PM

Operator hplc  
Instrument microTOF-Q III 8228888.20448

### Acquisition Parameter

|             |            |                       |           |                  |           |
|-------------|------------|-----------------------|-----------|------------------|-----------|
| Source Type | ESI        | Ion Polarity          | Positive  | Set Nebulizer    | 0.4 Bar   |
| Focus       | Not active | Set Capillary         | 4500 V    | Set Dry Heater   | 180 °C    |
| Scan Begin  | 50 m/z     | Set End Plate Offset  | -500 V    | Set Dry Gas      | 4.0 l/min |
| Scan End    | 1000 m/z   | Set Collision Cell RF | 140.0 Vpp | Set Divert Valve | Waste     |

| #    | RT [min] | Area | Int. Type       | I    | S/N  | Chromatogram | Max. m/z | FWHM [min] |
|------|----------|------|-----------------|------|------|--------------|----------|------------|
| n.a. | 3.4      | n.a. | Single spectrum | n.a. | n.a. | n.a.         | 469.2210 | n.a.       |

### +MS, 3.4min #200

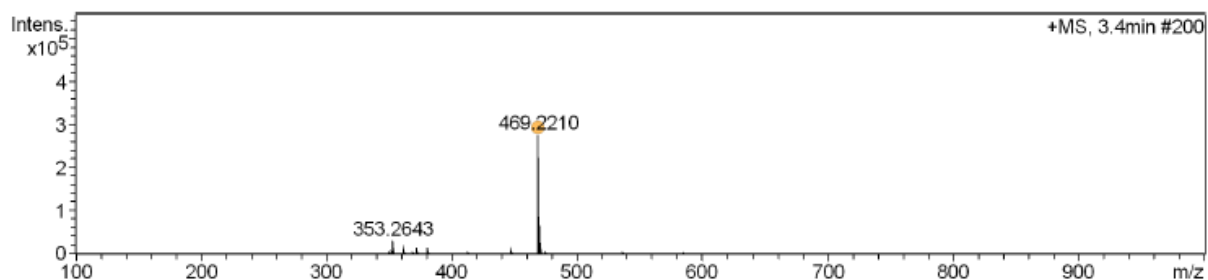

| Meas. m/z | # | Ion Formula                                                     | m/z      | err [ppm] | mSigma | # Sigma | Score  | rdB  | e <sup>-</sup> Conf | N-Rule |
|-----------|---|-----------------------------------------------------------------|----------|-----------|--------|---------|--------|------|---------------------|--------|
| 469.2210  | 1 | C <sub>26</sub> H <sub>30</sub> N <sub>4</sub> NaO <sub>3</sub> | 469.2210 | -0.1      | 5.0    | 1       | 100.00 | 13.5 | even                | ok     |
